# Supplementary material for: HeART of Stroke: randomised controlled, parallel-arm, feasibility study of a community-based arts and health intervention plus usual care compared with usual care to increase psychological well-being in people following a stroke
Source: PubMed Central journal article supplement — BMJ Open. 2019 Mar 8;9(3):e021098. doi: 10.1136/bmjopen-2017-021098 (PMC6429750; doi:10.1136/bmjopen-2017-021098), 2019-03-08
Supplement: bmjopen-2017-021098.draft_revisions.pdf [file bmjopen-2017-021098.draft_revisions.pdf]

# BMJ Open

BMJ Open is committed to open peer review. As part of this commitment we make the peer review history of every article we publish publicly available.

When an article is published we post the peer reviewers' comments and the authors' responses online. We also post the versions of the paper that were used during peer review. These are the versions that the peer review comments apply to.

The versions of the paper that follow are the versions that were submitted during the peer review process. They are not the versions of record or the final published versions. They should not be cited or distributed as the published version of this manuscript.

BMJ Open is an open access journal and the full, final, typeset and author-corrected version of record of the manuscript is available on our site with no access controls, subscription charges or pay-per-view fees (<http://bmjopen.bmj.com>).

If you have any questions on BMJ Open's open peer review process please email [info.bmjopen@bmj.com](mailto:info.bmjopen@bmj.com)

# BMJ Open

## HeART of Stroke: Randomised controlled parallel arm feasibility study of a community-based Arts & Health intervention compared with usual care to increase psychological wellbeing in people following a stroke.

|                               |                                                                                                                                                                                                                                                                                                                                                                                                                                                                                                                                                                                                                                                                                                                                                                                                                                                                                                                                                                                                                                                                                                                                                                                       |
|-------------------------------|---------------------------------------------------------------------------------------------------------------------------------------------------------------------------------------------------------------------------------------------------------------------------------------------------------------------------------------------------------------------------------------------------------------------------------------------------------------------------------------------------------------------------------------------------------------------------------------------------------------------------------------------------------------------------------------------------------------------------------------------------------------------------------------------------------------------------------------------------------------------------------------------------------------------------------------------------------------------------------------------------------------------------------------------------------------------------------------------------------------------------------------------------------------------------------------|
| Journal:                      | <i>BMJ Open</i>                                                                                                                                                                                                                                                                                                                                                                                                                                                                                                                                                                                                                                                                                                                                                                                                                                                                                                                                                                                                                                                                                                                                                                       |
| Manuscript ID                 | bmjopen-2017-021098                                                                                                                                                                                                                                                                                                                                                                                                                                                                                                                                                                                                                                                                                                                                                                                                                                                                                                                                                                                                                                                                                                                                                                   |
| Article Type:                 | Research                                                                                                                                                                                                                                                                                                                                                                                                                                                                                                                                                                                                                                                                                                                                                                                                                                                                                                                                                                                                                                                                                                                                                                              |
| Date Submitted by the Author: | 15-Dec-2017                                                                                                                                                                                                                                                                                                                                                                                                                                                                                                                                                                                                                                                                                                                                                                                                                                                                                                                                                                                                                                                                                                                                                                           |
| Complete List of Authors:     | <p>Ellis-Hill, Caroline; Bournemouth University,<br/> Thomas, Sarah; Bournemouth University, Faculty of Health &amp; Social Sciences<br/> Gracey, Fergus; University of East Anglia, Department of Clinical Psychology<br/> Lamont-Robinson, Catherine; University of Bristol, School of Social and Community Medicine<br/> Cant, Robin; Service User, formerly of Canterbury Christ Church University<br/> Marques, Elsa; University of Bristol, School of Social and Community Medicine<br/> Thomas, Peter; Bournemouth University, Faculty of Health and Social Sciences<br/> Grant, Mary; University of Warwick<br/> Nunn, Samantha; Cambridgeshire Community Services NHS Trust, Oliver Zangwill Centre<br/> Paling, Thomas; University of Bristol School of Social and Community Medicine<br/> Thomas, Charlotte; Bournemouth University, School of Health and Social Sciences<br/> Werson, Alessa; University of East Anglia, Department of Clinical Psychology<br/> Galvin, Kathleen; School of Health Sciences<br/> Reynolds, Frances; Brunel University London, College of Health and Life Sciences<br/> Jenkinson, Damian; Dorset County Hospital NHS Foundation Trust</p> |
| Keywords:                     | Stroke < NEUROLOGY, Arts & Health, Identity, Wellbeing, Feasibility Study                                                                                                                                                                                                                                                                                                                                                                                                                                                                                                                                                                                                                                                                                                                                                                                                                                                                                                                                                                                                                                                                                                             |
|                               |                                                                                                                                                                                                                                                                                                                                                                                                                                                                                                                                                                                                                                                                                                                                                                                                                                                                                                                                                                                                                                                                                                                                                                                       |

SCHOLARONE™  
Manuscripts

1  
2  
3 **Title:** HeART of Stroke: Randomised controlled parallel arm feasibility study of a community-  
4 based Arts & Health intervention compared with usual care to increase psychological  
5 wellbeing in people following a stroke.  
6  
7

8  
9 **Corresponding author:**

10  
11 Caroline Ellis-Hill, Faculty of Health and Social Sciences; Bournemouth University,  
12 Bournemouth, UK  
13  
14  
15 cehill@bournemouth.ac.uk  
16  
17

18  
19 **Co-authors:**

20 Sarah Thomas, Faculty of Health and Social Sciences, Bournemouth University,  
21 Bournemouth, UK  
22

23  
24 Fergus Gracey, Department of Clinical Psychology, University of East Anglia, Norwich, UK  
25

26 Catherine Lamont-Robinson, School of Social and Community Medicine, University of  
27 Bristol, Bristol, UK  
28

29 Robin Cant, Servicer User, (formerly of Canterbury Christ Church University), Canterbury,  
30 UK  
31

32  
33 Elsa Marques, School of Clinical Sciences, University of Bristol, Bristol, UK  
34

35 Peter Thomas, Faculty of Health and Social Sciences, Bournemouth University,  
36 Bournemouth, UK  
37

38  
39 Mary Grant, Warwick Clinical Trials Unit, University of Warwick, Coventry, UK  
40

41 Samantha Nunn, Cambridgeshire Community Services NHS Trust, Oliver Zangwill Centre,  
42 Ely, UK  
43

44 Thomas Paling, School of Clinical Sciences, University of Bristol, Bristol, UK  
45

46 Charlotte Thomas, Faculty of Health and Social Sciences, Bournemouth University,  
47 Bournemouth, UK  
48

49  
50 Alessa Werson Department of Clinical Psychology, University of East Anglia, Norwich, UK  
51

52 Kathleen Galvin, School of Health Sciences, University of Brighton, Brighton, UK  
53

54 Frances Reynolds, formerly College of Health and Life Sciences, Brunel University London,  
55 Uxbridge, UK  
56  
57

1  
2  
3  
4 Damian Jenkinson, Stroke Unit, Dorset County Hospital, Dorchester UK  
5  
6  
7

8 **Keywords: stroke, Arts & Health, identity, wellbeing, feasibility study**  
9

10 **Word count: ~ 6413**  
11  
12  
13  
14  
15  
16  
17  
18  
19  
20  
21  
22  
23  
24  
25  
26  
27  
28  
29  
30  
31  
32  
33  
34  
35  
36  
37  
38  
39  
40  
41  
42  
43  
44  
45  
46  
47  
48  
49  
50  
51  
52  
53  
54  
55  
56  
57  
58  
59  
60

## ABSTRACT

**Objectives:** People often experience distress following stroke due to a fundamental challenge to their identity. We evaluated (i) the acceptability of a community-based Arts & Health group intervention ('HeART of Stroke' [HoS]) to increase psychological wellbeing; (ii) the feasibility of a definitive randomised controlled trial (RCT).

**Design:** Two-centre 24-month parallel arm RCT with qualitative and economic components. Randomisation stratified by centre and stroke severity. Participant blinding was not possible. Outcome assessment blinding attempted.

**Setting:** Community

**Participants:** Community-dwelling adults  $\leq$  2 years post-stroke, recruited via hospital clinical teams/databases or community stroke/rehabilitation teams.

**Interventions:** HoS plus usual care (UC) versus UC. HoS is a 10-session artist-facilitated group intervention held over 14 weeks.

**Outcomes:** Self-reported measures of wellbeing, mood, capability, health-related quality of life, self-esteem and self-concept were administered at baseline and five months post-randomisation. Key feasibility parameters were gathered, data collection methods piloted and participant interviews (n=24) explored acceptability of the intervention/study processes.

**Results:** Despite a low (14%; 95% CI: 11% to 18%) recruitment rate, 88% of the recruitment target was met with 29 participants randomised to HoS and 27 to UC (57% male; mean [SD] age = 70 [12.1] years; time-since-stroke = 9 [6.1] months). Follow-up data were available for 47/56 (84%; 95% CI: 72% to 91%). Resource use questionnaire completion was 79% and 68% (NHS and societal perspectives). Five declined HoS post-randomisation; of the remaining 24, 83% attended  $\geq$ 6 sessions. Preliminary effect sizes for potential primary outcomes were in the direction of benefit for the HoS arm. Participants found study

1  
2  
3 processes acceptable. The intervention cost an estimated £456 per person and was well-  
4  
5 received. No intervention-related serious adverse events were reported.  
6

7  
8 **Conclusions:** Findings from this first community-based study of an Arts & Health  
9  
10 intervention for people following stroke suggest a definitive trial is feasible and warranted.  
11  
12 Recruitment methods will be revised.  
13

14  
15  
16  
17  
18  
19  
20  
21  
22  
23  
24  
25  
26  
27  
28  
29  
30  
31  
32  
33  
34  
35  
36  
37  
38  
39  
40  
41  
42  
43  
44  
45  
46  
47  
48  
49  
50  
51  
52  
53  
54  
55  
56  
57  
58  
59  
60  
ISRCTN 99728983

### ***Strengths and limitations of this study***

- The first feasibility study of a community-based Arts & Health group intervention to support wellbeing following a stroke.
- Participants were recruited via both hospital (Bournemouth centre) and community (Cambridgeshire centre) clinical teams.
- Incorporated mixed methods and a feasibility economic component.
- The study only included short term follow-up.
- Findings will inform a definitive randomised controlled trial of effectiveness and cost-effectiveness.

## INTRODUCTION

Each year over 150,000 people in the UK experience a stroke<sup>1</sup> with one-third left with residual disabilities including paralysis on one side and cognitive and communication impairments.<sup>2</sup> Recent qualitative systematic reviews have highlighted that following a stroke or other types of brain injury people face fundamental existential challenges in terms of uncertainty and loss of their usual everyday world, leading to challenges to their sense of self and identity.<sup>3-5</sup> Emotional health and wellbeing following stroke have been highlighted as national priorities, featuring in the James Lind Alliance 'top ten' research priorities.<sup>6</sup>

Following a stroke people report a need to 'get their lives back'. Failure to do so is associated with depression (with reported accumulative incidence of 39–52% within 5 years of stroke<sup>7</sup>), loss of confidence,<sup>8</sup> people having difficulty in 'feeling part of things'<sup>9</sup> and becoming socially isolated.<sup>10</sup> This creates long-term costs, not only for the stroke survivor, but also for their family members,<sup>11,12</sup> and for government, health and social services through reduced family employment and increased social and primary care needs,<sup>13</sup> and where untreated, depression is associated with poorer functional outcomes<sup>14</sup>

Ellis-Hill et al.<sup>15</sup> and Gracey et al.<sup>16</sup> have independently developed complementary theoretical models based on empirical evidence to understand the processes involved in re-establishing a positive sense of self and confidence in life following a stroke. A key factor is being able to reconstruct a sense of meaning, predictability and coherence in everyday life, when previously taken for granted assumptions often no longer hold true. In order to develop a positive sense of self and self-confidence people need to explore and develop new ways of understanding and 'being in the world'.<sup>17,18</sup>

While there have been great improvements in stroke care, and emotional health and wellbeing have long been seen as nationally important outcomes,<sup>2</sup> the stroke pathway for

1  
2  
3 long-term support is still under-researched and under-developed. A stepped approach to  
4 psychological support has been proposed<sup>19</sup> but this system is still in its infancy.

5  
6 Furthermore, a Cochrane review indicated no evidence for pharmacotherapy in prevention of  
7  
8 post-stroke depression, and only weak evidence for psychotherapeutic approaches.<sup>20</sup>  
9

10  
11  
12  
13 Using interviews and focus groups, Harrison et al.<sup>21</sup> explored stroke patients', health care  
14 professionals' and carers' experiences of care provision in hospital and immediately post-  
15 discharge. They concluded that further research is required to establish the effectiveness of  
16 alternative options to formal psychological support. White et al. identified community non-  
17 participation and stroke-related disability as potentially modifiable risk factors affecting post-  
18 stroke health-related quality of life and that interventions addressing these factors should be  
19 developed and tested.<sup>22</sup> Thus, there is an empirical basis, in addition to a pressing need,  
20 and desire on the part of patients, for investigation of alternative options to promote  
21 wellbeing post-stroke upon return to community life.  
22  
23  
24  
25  
26  
27  
28  
29  
30  
31  
32

33 There is growing recognition of the importance of creative approaches in health provision;<sup>23</sup>  
34 for example, in the United Kingdom we have seen the creation of a national Special Interest  
35 Group for Arts, Health and Wellbeing and the launch of an All-Party Parliamentary Group  
36 (APPG) inquiry into Arts, Health and Wellbeing.<sup>24</sup> Practical creative approaches offer new  
37 ways to explore experiences, especially those difficult to put into words.<sup>25</sup> There is a body of  
38 evidence that arts-based practices are of great benefit in supporting psychological and social  
39 recovery in mental health services<sup>26</sup> and an emerging international agenda and evidence  
40 base for 'Arts for Health' initiatives.<sup>27,28</sup> Concurrently, there is increasing research into the  
41 effect of art on mood and wellbeing following stroke.<sup>29-32</sup> This feasibility study is the first to  
42 test this approach formally in a community setting.  
43  
44  
45  
46  
47  
48  
49  
50  
51  
52  
53  
54  
55  
56  
57  
58  
59  
60



## METHODS

### Ethical approvals

The study was reviewed and given a favourable opinion by the Exeter NHS REC (Ref: 13/SW/0136). Local Research and Development approval was granted by the Royal Bournemouth and Christchurch Hospitals (RBCH) NHS Foundation Trust (the study sponsor) and by Cambridgeshire Community Services NHS Trust.

### Aims and objectives

The aims of the feasibility study were, firstly, to assess the acceptability of a 10-session community Arts & Health group intervention ('HeART of Stroke') for people following stroke and, secondly, to evaluate the feasibility of conducting a definitive randomised controlled trial to test its effectiveness and cost effectiveness when added to usual care. The specific objectives are described in detail in the published protocol<sup>33</sup> but, in brief, they were to:

- i. assess the acceptability of aspects of study design, processes and of the HeART of Stroke (HoS) intervention;
- ii. estimate key parameters such as recruitment, retention, outcome completion rates and intervention attendance;
- iii. collect data on the variability of outcomes and their acceptability, to inform the selection of outcomes for the definitive trial;
- iv. develop and pilot data collection tools to collect resource use and costs in the future trial, and estimate the cost of delivering HoS.

### Study design

A two centre parallel arm randomised controlled feasibility study comparing the HoS group intervention plus usual care versus usual care alone (1:1 allocation ratio), with nested economic and qualitative components.

## Patient and public involvement (PPI)

Patient and public involvement members were involved in the initiation and the design of the study, the development of the funding application, the design of the HoS intervention, the selection of relevant outcome measures and the design of data collection tools. During the research as well as having RC, a grant holder, who attended all steering group and dissemination meetings, we formed PPI groups in each centre. There were five PPI members in Bournemouth (four involved in the study at any one time) and three PPI members in Cambridgeshire.

As planned, patient and public involvement members were involved in three of the five study management group meetings. A newsletter kept PPI members updated with study progress. Members contributed to the study in many ways, including providing feedback about outcome measures, providing opportunities for the researchers to run through/practise aspects of the study protocol, finding a suitable venue for the intervention, providing ideas on how to enhance recruitment, helping with plain English summaries, supporting the exhibition of artwork and other dissemination activities. As part of dissemination activities, one of the study participants delivered a workshop at the UK Stroke Forum alongside CLR and CEH.

## Methods

Details of our methods are published in our protocol paper.<sup>33</sup> We aimed to recruit a sample of 64 people (32 per centre in two blocks of 16). This would have provided an estimate of the recruitment rate with a precision of  $\pm 6\%$  (assuming a recruitment rate of 30%) and a questionnaire return rate with a precision of  $\pm 10\%$  (assuming a questionnaire return rate of 80%).

## Participants

1  
2  
3 Participants were adults living in the community up to two years post-stroke with physical or  
4 cognitive symptoms from stroke at five days post-stroke. Exclusion criteria included severe  
5 receptive aphasia, cognitive levels that would preclude completion of outcome measures  
6 even with support, currently receiving a psychiatric or clinical psychology intervention, living  
7 in a residential or nursing home, requiring assistance with toilet needs (because the Arts &  
8 Health practitioners were not trained to support transfers).  
9  
10  
11  
12  
13  
14  
15

### 16 **Identification, screening and recruitment**

#### 17 ***Bournemouth Centre (Royal Bournemouth and Christchurch Hospitals (RBCH) NHS*** 18 ***Foundation Trust)***

19 Potential participants, identified by clinical research network staff at RBCH NHS Foundation  
20 Trust, were either sent or given an invitation letter, 'Key Facts' page and reply slip and asked  
21 to return a prepaid reply slip if they were interested in participating. The study research  
22 assistant (RA) contacted those who expressed an interest and answered any queries or  
23 questions (via telephone, or face-to-face if the person had a communication disability). If  
24 they were still interested in taking part, they were sent or given a set of Participant  
25 Information Sheets (PIS).  
26  
27  
28  
29  
30  
31  
32  
33  
34  
35  
36  
37

38 In an attempt to improve recruitment we revised the invitation and reminder letters partway  
39 through the study via an approved substantial amendment to the NHS REC. Our PPI  
40 partners and clinical colleagues in the stroke research team at RBCH provided feedback to  
41 enhance the appeal and readability of the information via a more accessible and engaging  
42 style.  
43  
44  
45  
46  
47  
48  
49

#### 50 ***Cambridgeshire Centre (Cambridgeshire Community Services NHS Trust)***

51 Clinical staff from the community stroke and neuro-rehabilitation teams identified potential  
52 participants in the community. In addition to the invitation letter described above, a 'consent  
53  
54  
55  
56  
57  
58  
59  
60

1  
2  
3 to contact' approach was used whereby consent to be contacted by the Cambridgeshire  
4 centre RA was sought. A member of the clinical team obtained this consent during a face-to-  
5 face consultation or verbally over the phone. If the individual remained interested, the RA  
6 gave/sent them a set of PIS.  
7  
8  
9

### 10 11 12 **Informed consent process** 13

14 For individuals interested in taking part, the local RA arranged to visit the person at home  
15 within one month prior to the start of the HoS group. This provided an opportunity to answer  
16 any remaining questions the individual had about the study. If the person still fulfilled the  
17 eligibility criteria (a screening checklist was used) and still wished to take part, they were  
18 asked to complete and sign a consent form and complete the baseline assessment.  
19  
20  
21  
22  
23  
24  
25

### 26 **Randomisation** 27

28 The web-based randomisation system was created by the Peninsula Clinical Trials Unit in  
29 conjunction with the study statistician. Participants were allocated to the HoS intervention  
30 plus usual care or usual care in a 1:1 ratio using minimisation to balance the numbers  
31 allocated to each arm with stratification by recruitment centre and stroke severity (Rivermead  
32 Motor Assessment – Gross Motor Subscale score  $\leq 6$  ('mild') vs.  $\geq 7$  ('moderate/severe')).<sup>34</sup>  
33  
34 The study research assistants in each centre logged onto the system using a unique  
35 username and password. They were able to randomise participants individually or in  
36 batches. Individual randomisation was used to 'top up' the two trial arms if any further  
37 participants were recruited before the HoS intervention groups started.  
38  
39  
40  
41  
42  
43  
44  
45  
46  
47

### 48 **Blinding** 49

50 The nature of the intervention meant that it was not possible to blind participants and artist  
51 facilitators to group allocation. At follow-up, when support was provided/required to complete  
52 outcomes this was provided by assessors blind to group allocation.  
53  
54  
55  
56  
57  
58  
59  
60

### **HeART of Stroke (HoS) group intervention**

The HoS intervention is described in detail in the published protocol.<sup>33</sup> The rationale of HoS is to provide a safe space through the medium of the Arts in which group members have the opportunity to reconnect with their internal selves through their senses and embodied knowing and connect with, and support, others. This was a face-to-face group intervention, with self-directed individual art activity opportunities between meetings. Standardisation was linked with the context and setting rather than with what the practitioners and participants did, as this was expected to vary due to the creative nature of the activity.

#### *HoS group sessions*

The HoS intervention comprised 10 two hour group sessions held over 14 weeks in the mornings (10.30-12.30) with a refreshment break. Sessions 1-3 included introductions and initial exploration. During sessions 4-7 participants were encouraged to develop their own creative practice within the sessions and at home. In sessions 8-10 links with local Arts & Health practitioners were made and potential plans for an exhibition of the participants' work discussed.

At each group, the Arts & Health practitioners encouraged members to a) explore the materials provided and arts techniques shared; b) explore their senses and support others' explorations; b) be non-judgmental of self/others; c) follow and respond to their own interests and e) develop a sense of play/improvisation. The Arts & Health practitioners prepared resources (including paints, drawing materials, clay, textiles and mixed-media) in response to the group members' individual and collective creative interests and skills. The group was offered 'stimulus' pieces such as books, poems, images, music and film and members were encouraged to share their own pieces of interest with the group.

Following each session, the Arts & Health practitioner briefly documented observations and reflected further to inform the selection of materials and activity for the following session.

1  
2  
3 Practitioners also provided participants with sketchbooks and/or paper and other arts  
4 materials to support their emerging interests between sessions.  
5  
6  
7

### 8 *Facilitators and venues*

9  
10 The groups were facilitated by Arts & Health practitioners, with at least 5 years' experience,  
11 who were able to support groups, create and hold a safe space, and who were willing and  
12 able to support arts practice where participants took the lead in their own discovery and  
13 exploration. One Arts & Health practitioner led both groups in Bournemouth (CLR) and two  
14 led one group each in Cambridgeshire. They had access to expertise in stroke (CEH) and  
15 clinical psychology (FG). For the purposes of the project a researcher was also present on  
16 site, if needed. The researcher supported study administration aspects (such as travel  
17 expenses for participants) and participant completion of a scale assessing group  
18 fit/belonging.<sup>35</sup>  
19  
20  
21  
22  
23  
24  
25  
26  
27  
28  
29

30 In Bournemouth the HoS groups (iterations 1 & 2) were held in a church hall and in  
31 Cambridge they were held either in a room in a community hospital site on the edge of  
32 Cambridge city used by Headway Cambridgeshire (a local brain injury charity) (iteration 3) or  
33 a community centre in a very rural north Cambridgeshire town (iteration 4). All venues had  
34 disabled access/toilet facilities, access to water and a sink, tea/coffee-making facilities and  
35 could accommodate up to eight participants (potentially with wheelchairs) around a table.  
36 There were storage facilities (albeit limited) in Cambridgeshire but none in the Bournemouth  
37 venue. Transport was provided for those unable to make their own way to the venue.  
38  
39  
40  
41  
42  
43  
44  
45  
46  
47

### 48 *Usual Care*

49  
50 In Bournemouth, support is provided by the Early Supported Discharge multidisciplinary  
51 team for 2–6 weeks after leaving hospital and then medical care via the General Practitioner  
52 (GP), with a referral to the Stroke Coordinator. People with complex medical conditions are  
53 seen by Stroke Consultants as hospital outpatients. Ongoing rehabilitation needs are met by  
54  
55  
56  
57  
58  
59  
60

1  
2  
3 rehabilitation teams and day hospital service provision in some areas. In Cambridgeshire,  
4 medical care is delivered via the GP and people with complex medical conditions are seen  
5 by Stroke Consultants as hospital outpatients. All can access support from the Stroke  
6 Association 'Information, Advice and Support Coordinator' and may receive additional  
7 therapy or support via one of three locality neurorehabilitation teams. Participants in both  
8 arms of the trial received usual care, and usual care was not affected by involvement in the  
9 trial.  
10  
11  
12  
13  
14  
15  
16  
17

## 18 **Descriptors and proposed outcome measures**

### 19 *Demographic/descriptor variables and stroke related information*

20  
21 At baseline the local RA collected information during a home visit about age, gender, marital  
22 status, educational qualifications, ethnicity, household composition, employment situation,  
23 comorbidities, medication, type of stroke, stroke side, time-since-stroke, mobility (Rivermead  
24 Assessment - Gross Motor subscale),<sup>34</sup> upper limb impairment (Motricity Index),<sup>36</sup>  
25 communication ability,<sup>37</sup> cognitive ability (Addenbrookes Cognitive Exam – Revised; ACE-  
26 R).<sup>38</sup>  
27  
28  
29  
30  
31  
32  
33  
34  
35

### 36 *Outcome measures*

37  
38 These were self-reported and presented in a booklet in a large font (pt. 14). At baseline,  
39 outcome measures were administered face-to-face by an RA in participants' homes. At  
40 approximately 5 months post-randomisation (1 month post - HoS intervention) outcome  
41 measures were administered by post, or if needed, with face-to-face or telephone support  
42 from a blinded assessor (one in each centre). At the end of the questionnaire booklet there  
43 was a question that asked whether participants had received any support from others to  
44 complete the questionnaire with the following response options possible: none, researcher  
45 on phone, researcher at house, family member/friend. Participants were asked not to  
46 disclose their allocation arm to the blinded assessors. In each centre the blinded assessors  
47 were asked to guess participants' treatment allocation.  
48  
49  
50  
51  
52  
53  
54  
55  
56  
57  
58  
59  
60

1  
2  
3  
4  
5  
6  
7  
8  
9  
10  
11  
12  
13  
14  
15  
16  
17  
18  
19  
20  
21  
22  
23  
24  
25  
26  
27  
28  
29  
30  
31  
32  
33  
34  
35  
36  
37  
38  
39  
40  
41  
42  
43  
44  
45  
46  
47  
48  
49  
50  
51  
52  
53  
54  
55  
56  
57  
58  
59  
60

*Proposed primary outcome measures for future trial*

These included the (i) Warwick and Edinburgh Mental Wellbeing Scale (WEMWBS);<sup>39</sup> (ii) Hospital Anxiety and Depression Scale (HADS);<sup>40</sup> (iii) ICEpop CAPability measure for adults (ICECAP-A).<sup>41</sup>

*Proposed secondary measures for future trial*

These included the (i) Rosenberg Self-Esteem Scale (RSES);<sup>42</sup> (ii) Medical Outcomes Short Form-36 (SF-36 V.1);<sup>43</sup> (iii) Head Injury Semantic Differential Scale (HISDS-III).<sup>44</sup>

*Serious adverse events and adverse events*

Serious adverse events (SAEs) and adverse events (AEs) were closely monitored, documented and reported as described in the study protocol.<sup>33</sup>

*Process measures*

The Doojse scale<sup>35</sup> was used to measure 'sense of belonging' by participants in the HoS group at the end of the first, fifth and final session.

*Identifying, measuring and valuing resource use*

Resources required to deliver the HoS intervention were recorded for each session on forms completed by the artist facilitators. These included artists' preparation time, travel time to and from the venue, time spent delivering the intervention, equipment and materials used, number of participants attending the sessions, venue and venue hire costs. Resources were valued using local estimates provided by the experienced artists delivering HoS. Artist facilitators' time was valued at the fixed fee of £120 per session (to cover travel, preparation and delivery costs) with an additional £25 fee for materials and £8 for refreshments. Venue hire costs in Bournemouth (iterations 1 & 2) were £40 per session, and in Cambridgeshire, £100 per session (iteration 3) and £25 per session (iteration 4). We envisage the roll-out of



1  
2  
3 the HoS intervention would follow a similar model whereby the health care provider would  
4 pay the artist facilitators a fixed delivery fee. Participant travel costs to attend sessions were  
5 recorded and are reported.  
6  
7  
8  
9

10 Resources required to deliver usual care in both arms were collected via a bespoke resource  
11 use telephone-administered questionnaire that asked about resources used in the 4 months  
12 following randomisation. Participants were posted the questionnaire in advance of the  
13 telephone interview and were offered face-to-face support to complete it, if required. The  
14 questionnaire included hospital visits and admissions, use of community and social services,  
15 time off work and social activities, informal care, other sources of support, expenses incurred  
16 and medications. As service users advised us that it would be difficult to distinguish between  
17 stroke-related resource use and resource use related to co-morbidities, the questionnaire  
18 asked respondents to report resources related to all their health care needs. We assume  
19 that, in a definitive RCT, any differences between arms would result from the HoS  
20 intervention effect. To improve completion rates,<sup>45</sup> participants were provided with a  
21 resource use log to record health care visits prospectively, if they wished. Resources were  
22 valued using Curtis and Burns' Unit Costs of Health and Social Care<sup>46</sup> and the 2015  
23 Department of Health NHS reference costs.<sup>47</sup> Private expenses were self-reported. Hours of  
24 informal care and time off work and social activities were valued using the Office for National  
25 Statistics (2015) average weekly earnings.<sup>48</sup>  
26  
27  
28  
29  
30  
31  
32  
33  
34  
35  
36  
37  
38  
39  
40  
41  
42  
43

#### 44 *Interviews*

45  
46 Face-to-face interviews with twelve people (8 intervention; 4 usual care) were undertaken in  
47 people's homes across both centres by CEH on two occasions: i. post-randomisation but  
48 before the HoS intervention was delivered; and ii. at study end after all outcome measures  
49 had been completed. CEH selected participants from those who had already agreed to be  
50 approached to take part in an additional qualitative study. Purposive sampling was used to  
51 capture variations that might influence perceptions including age, gender, communication  
52  
53  
54  
55  
56  
57  
58  
59  
60

1  
2  
3 disability and severity of stroke. The pre-intervention topics included why the person decided  
4 to take part in the overall study, their views on the recruitment and initial assessment  
5 process, and for the intervention group, what they were expecting in terms of the HoS group  
6 intervention. The post-intervention topics included views on the study and outcome  
7 assessment processes and the acceptability of completing outcomes at one year follow-up in  
8 the context of a hypothetical future trial. Intervention participants were also asked about  
9 their experiences of the group, the venues, and their ability/willingness to pay their own  
10 transport costs to attend HoS.  
11  
12  
13  
14  
15  
16  
17  
18  
19

## 20 **Analysis**

21 The analysis undertaken followed that described in the protocol unless otherwise stated.<sup>33</sup>  
22  
23  
24  
25

### 26 *Quantitative analysis*

27 Quantitative analysis was carried out using IBM SPSS V23.0 and STATA V14. The person  
28 undertaking the analysis was blind to allocation and group assignment was coded using 0  
29 and 1. As this is a feasibility study, analyses are primarily descriptive and focus on baseline  
30 participant characteristics and the estimation of key feasibility parameters.<sup>49</sup> Estimates of  
31 recruitment, retention and questionnaire completion rates are presented with 95%  
32 confidence intervals (CIs). Intervention attendance rates are described.  
33  
34  
35  
36  
37  
38  
39  
40

41 Preliminary estimates of effect size with 95% CIs are presented for the four potential primary  
42 outcomes to inform the plausibility of the effect sizes used in future sample size calculations.  
43 Participants were analysed in the group they were randomised to and we attempted to  
44 collect outcome measure data from everyone randomised. Missing data were assumed to be  
45 missing completely at random (MCAR) and no imputation methods were used. Analysis of  
46 covariance was used to estimate effect size for each outcome variable at follow-up, adjusting  
47 for centre and the respective baseline values. Although stroke severity was a stratification  
48 variable in the randomisation we have not adjusted for it in the analysis because of the very  
49  
50  
51  
52  
53  
54  
55  
56  
57  
58  
59  
60

1  
2  
3 small number with a severe stroke. In the future trial we would also take into account  
4 clustering effects resulting from the group-based nature of the HoS intervention.<sup>50</sup> We have  
5 not taken into account clustering in the analysis presented here because (a) this is a  
6 feasibility study where the aim is not to obtain precise estimates of effect size and (b) there  
7 were just 56 participants (29 receiving the HoS intervention) and only a small number of  
8 clusters (n = 4) making it difficult to adjust for clustering. A consequence is that widths of the  
9 95% confidence intervals are likely to be underestimated. Standardised effect sizes (Cohen's  
10 d) were obtained by dividing effect sizes by pooled baseline standard deviation.  
11  
12  
13  
14  
15  
16  
17  
18  
19

### 20 *Economic analysis*

21  
22 We report completion rates for the resource use categories. A preliminary estimate of the  
23 cost of delivering the HoS intervention was derived using macro-level costings. We also  
24 report artist facilitator time to deliver the intervention at the micro-level and patient travel  
25 expenses to the sessions.  
26  
27  
28  
29

30  
31  
32 We further report resource use units and costs per category per trial arm, for an indication of  
33 cost-drivers for the intervention for the health and social care perspective. We derived  
34 capability index scores for the ICECAP-A<sup>51</sup> and applied UK preference-based tariffs to the  
35 SF-6D to derive quality-adjusted life-years.<sup>52</sup>  
36  
37  
38  
39  
40

### 41 *Qualitative analysis*

42  
43 The interviews were transcribed verbatim. The responses related to the research processes  
44 such as recruitment, screening and the administration of outcome measures as well as the  
45 acceptability of the venue, the intervention, and potential willingness to pay for the  
46 intervention (latter three, intervention group only) were analysed using content analysis.<sup>53</sup>  
47  
48  
49  
50  
51  
52 The accounts of the expectations and experiences of the intervention were analysed  
53 separately using thematic analysis.<sup>54</sup> These findings will be reported elsewhere.  
54  
55  
56  
57  
58  
59  
60

## RESULTS

### *Study procedures, recruitment and retention rates*

Fifty-six people were randomised (88% of our original target of 64) (see Figure 1). Nearly two-thirds of the sample was male and the mean age of the sample was 70 (SD 12.1) years and mean time-since-stroke was 9 (SD 6.1) months. Approximately 80% of participants had had ischaemic strokes. Seventy percent of the sample was retired (see Table 1). One participant who had had their stroke outside the 2 year post-stroke inclusion time window (32 months post-stroke) was erroneously recruited into the study. We included this participant's data in the analysis.

*INSERT FIG 1 ABOUT HERE*

*INSERT TABLE 1 ABOUT HERE*

Participants were enrolled into the study between August 2014 and April 2015 and the final follow-up occurred in December 2015. The recruitment rate across both centres was 14% [95% CI: 11% to 17%]. In Bournemouth, an acute hospital setting, the recruitment rate was 11% [95% CI: 8% to 14%] and in Cambridgeshire, a community setting, it was 28% [95% CI: 19% to 38%].

In total, information about the study was given or sent to 396 people (313 in Bournemouth and 83 in Cambridgeshire). Of these, 198 people declined participation, 112 did not return the reply slip, four did not meet the inclusion criteria, 26 were excluded for 'other reasons' (see Figure 1).

Six participants (11%) withdrew from both the study and follow-up data collection and three participants (5%) did not return the main outcome measures at follow-up. For two of the three proposed potential primary outcomes (HADS and ICECAP-A), 47/56 (84% (95% CI

1  
2  
3 73%, 92%)) of randomised participants had complete baseline and follow-up data and 46/56  
4 (82% (95% CI: 70%, 91%)) had complete baseline and follow-up data for the WEMWBS.  
5  
6  
7

### 8 *Reasons for non-participation*

9  
10 Of 198 people declining participation, 89 gave reasons, the most common ones related to  
11 not being interested/feeling the intervention 'wasn't right for them' (n=27) and health reasons  
12 (n=14).  
13  
14  
15

### 16 *Delivery, attendance rates and group size*

17  
18 Five participants allocated to the HoS arm declined the intervention post-randomisation (see  
19 CONSORT diagram for reasons). Of the 29 participants randomised to HoS sessions 20  
21 (69%, 95% CI; 51% to 84%) attended six or more of the 10 sessions.  
22  
23  
24  
25  
26  
27

28 Two HoS groups were delivered in Bournemouth (iterations 1 & 2) and two in  
29 Cambridgeshire (iterations 3 & 4). The timing of the HoS sessions deviated slightly from that  
30 specified in the original protocol (first 7 sessions held weekly, sessions 8-9 fortnightly, and  
31 session 10 held three weeks later) in three of the four iterations due to venue availability and  
32 the timing of public holidays. In Bournemouth, breaks occurred in weeks 6, 8, 9 and 13  
33 (iteration 1) and in weeks 5, 8, 9 and 12 (iteration 2). In the Cambridgeshire centre, breaks  
34 occurred in weeks 2, 6, 10 and 13 (iteration 3). The second iteration (iteration 4) in  
35 Cambridgeshire followed the protocol.  
36  
37  
38  
39  
40  
41  
42  
43  
44  
45

46 The planned group size was 6-8 participants and this target was mostly met in iterations 1-3  
47 with 70% (21/30) of the delivered sessions including six or more people. However, due to  
48 time pressures, and because the grant was coming to end, iteration 4 commenced before  
49 iteration 3 had finished and only six people were allocated to the intervention arm for this  
50 final iteration. Two of these subsequently declined attending the intervention and one person  
51  
52  
53  
54  
55  
56  
57  
58  
59  
60

1  
2  
3 withdrew from the intervention after attending the first session, with the result that in iteration  
4  
5 4, six of the 10 sessions included only two people.  
6  
7

8 Ratings on the domains of the Doojse Scale (measuring 'sense of belonging')<sup>44</sup> increased  
9  
10 across sessions and remained high in the final session (see Table S1 in data supplement).  
11  
12  
13

#### 14 *Support requirements for HoS group members*

15  
16 At the Cambridgeshire centre one of the artist facilitators discussed a HoS group member's  
17  
18 cognitive needs with FG (clinical psychology). Subsequently, several adaptations were  
19  
20 identified and implemented such as providing a small sketchpad when needing to wait for  
21  
22 additional support and providing instructions one step at a time.  
23  
24  
25

#### 26 *Suitability of the outcome measures and feasibility of the assessment strategy*

27  
28 The ACE-R, originally designed as a screening tool for dementia, provides a single overall  
29  
30 functioning standardised score, and relies heavily on language abilities. It did not prove  
31  
32 suitable for our sample, of whom nearly half (46%) had some degree of language difficulty.  
33  
34 We have not presented the baseline descriptive data for the ACE-R as we do not feel they  
35  
36 provide an accurate summary of the sample's cognitive abilities.  
37  
38  
39

40 Overall, participants found the self-reported outcome measures acceptable and were able to  
41  
42 complete them, sometimes requiring support. However, in the qualitative interviews several  
43  
44 participants reported finding the HISDS-III<sup>42</sup> difficult to complete likely due to its relatively  
45  
46 complex language demands and the way in which the bipolar adjective pairs comprising the  
47  
48 scale vary in direction. These difficulties were reflected in some of the response patterns  
49  
50 obtained and corroborated by the blinded assessors' experiences. For these reasons we  
51  
52 have not presented these data.  
53  
54  
55  
56  
57  
58  
59  
60

1  
2  
3 Missing questionnaire data were followed-up via telephone by an RA (baseline) or blinded  
4 assessor (follow-up) at each centre. Levels of missing data were very low - overall, 99.8% of  
5 the questionnaire items comprising the four identified potential primary outcomes were  
6 completed (1809/1815 items at baseline and 1550/1551 items at follow-up) by those who  
7 provided outcomes (at baseline n= 55 and follow up n = 47).  
8  
9  
10  
11  
12  
13

#### 14 *Support requirements to complete outcomes*

15  
16 At follow-up, the self-report questionnaire booklets were administered postally by default but  
17 face-to-face support was provided if required/requested. Fifty-eight percent of those with  
18 outcomes at follow-up (26/45, data for 2 cases missing) reported that they completed the  
19 questionnaire booklet with no support, 8 (18%) received support from the researcher in the  
20 home, 10 (22%) received support from family and friends and 1 (2%) received telephone  
21 support from the blinded assessor.  
22  
23  
24  
25  
26  
27  
28  
29

#### 30 *Possible primary outcomes*

31  
32 In Table 2 we present descriptives for the four possible primary outcomes (WEMWBS,  
33 HADS-A, HADS-D, ICECAP-A) and descriptives for all other outcomes gathered are  
34 presented in Web Supplement Table S2.  
35  
36  
37  
38  
39

40 *INSERT TABLE 2 ABOUT HERE*  
41  
42  
43

#### 44 *Completion of resource use questionnaire*

45  
46 The resource use questionnaire was completed by 50/56 of participants (89%), 25/29 of  
47 patients in the HoS arm and 25/27 of patients in the usual care arm. Of these 33 (66%) were  
48 administered over the telephone, 16 (32%) face-to-face at home and 1 (2%) via the post.  
49 Although not included in the original study protocol, in the Bournemouth centre duration data  
50 were logged with the 19 telephone interviews lasting 23 minutes (SD=10) on average and  
51 the 8 face-to-face administrations in the home an average of 38 minutes (SD=13).  
52  
53  
54  
55  
56  
57  
58  
59  
60

1  
2  
3  
4  
5 Completion rates of resource use categories were high and similar between the arms of the  
6 trial (Table 3). The least completed category was community based services such as primary  
7 care visits (see Table 3) with 90% complete data for this category (both trial arms  
8 combined). Seventy-nine percent complete data (out of the full sample) is available for an  
9 economic analysis from the health and social care perspective.  
10  
11  
12  
13  
14  
15

16  
17 *INSERT TABLE 3 ABOUT HERE*  
18  
19

#### 20 *Assessor allocation guesses*

21  
22 At the Cambridgeshire centre, due to a delay in receiving approval for patient access for the  
23 blinded assessor, the unblinded RA administered outcomes to six participants. Overall 50/56  
24 participants (Cambridgeshire = 23; Bournemouth = 27) completed questionnaire outcomes  
25 and/or telephone health use questionnaires at follow-up. In Cambridgeshire, the blinded  
26 assessor correctly guessed allocation on 9/17 (53%) occasions ( $p = 1.00$  using the exact  
27 binomial test to compare with expected percentage of 50%) (NB. the six outcome  
28 assessment occasions in Cambridgeshire that were not undertaken by a blinded assessor  
29 are excluded). In Bournemouth, the blinded assessor correctly guessed allocation on 24/27  
30 (89%) occasions ( $p < .001$ ). Thus overall the blinded assessors correctly guessed allocation  
31 on 33/44 (75%; 95% CI 61% to 85%) occasions,  $p = 0.001$ .  
32  
33  
34  
35  
36  
37  
38  
39  
40  
41  
42  
43

#### 44 *Serious adverse events and adverse events*

45  
46 Five serious adverse events were reported during the study period. None was deemed  
47 related to the intervention. These included admissions to hospital for bunion removal, facial  
48 weakness and vomiting, atrial fibrillation, pneumonia, and a transient ischaemic attack.  
49  
50  
51  
52  
53  
54  
55  
56  
57  
58  
59  
60



1  
2  
3 Five adverse events were noted. None was deemed related to the intervention. Four people  
4 attended the Emergency Department but were not admitted (water retention, fall at home,  
5 fall in the road, anxiety). One person sustained a minor injury to their arm at home.  
6  
7  
8  
9

#### 10 *Cost of delivering the HoS intervention*

11  
12 The cost of delivering the HoS intervention was £1,960 in Bournemouth and £2,530 in  
13 Cambridgeshire, reflecting higher venue hire costs in Cambridgeshire (see Table 4). On  
14 average, six participants attended the two HoS iterations held in Bournemouth and four  
15 attended the two HoS iterations held in Cambridgeshire. The HoS intervention would cost  
16 the health care payer, on average, £327 per participant in Bournemouth and £657 in  
17 Cambridgeshire. The cost could be as low as £245 per participant at full capacity of 8  
18 people.  
19  
20  
21  
22  
23  
24  
25  
26  
27

28 *INSERT TABLE 4 ABOUT HERE*  
29  
30  
31

#### 32 *Health-related quality of life gain, resource use and costs*

33  
34 Table 5 reports the quality adjusted life year (QALY) gains from baseline and resource use  
35 and costs for the HoS and usual care arms. Potential cost drivers for the intervention are  
36 inpatient and outpatient appointments and contacts with a social worker.  
37  
38  
39  
40  
41

42 *INSERT TABLE 5 ABOUT HERE*  
43  
44

#### 45 *Qualitative*

46 All 12 people who were purposively sampled for interview (8 intervention, 4 usual care) were  
47 interviewed on two occasions (male =7, female = 5; mean age = 70 years (range 51-83  
48 years); mean time-since-stroke = 7 months (range 4-12 months)). Most had had a mild, and  
49 one a moderately disabling, stroke. Nine had an affected arm and five had speech  
50 difficulties. All participants found the research processes acceptable and the screening and  
51 outcome measures easy to complete with the support provided. One person commented  
52  
53  
54  
55  
56  
57  
58  
59  
60

1  
2  
3 negatively on the cognitive assessment as her husband who lived with dementia had had to  
4 complete it in the past. One person noted they would have liked more opportunities for open  
5 answers on the questionnaires so they could provide some explanations about their  
6 responses. All interviewees would have been happy to complete outcome measures at 4  
7 and 12 months follow up, if asked. They valued receiving the economic checklist which some  
8 completed over the specified time period and others used to supplement the telephone  
9 interviews.

10  
11  
12  
13  
14  
15  
16  
17  
18 Timing of sessions (held in the morning) and session duration (2 hours) were acceptable.  
19 While the venues were found to be acceptable, a few people mentioned that they would  
20 have liked access to a café where they could meet following the HoS sessions. Participants  
21 in Bournemouth were willing to pay up to £10 per session for transport if required. As all but  
22 one interviewee in Cambridgeshire drove to sessions (it was a much more rural setting than  
23 Bournemouth) and were happy to do so, transport costs were not discussed during the  
24 interviews. The one interviewee who used transport in Cambridgeshire only attended one  
25 session due to health issues (unrelated to stroke). Findings related to expectations and  
26 experiences of taking part in the groups will be reported elsewhere.

## 37 38 **DISCUSSION**

39  
40  
41 This is the first study to formally test the feasibility of an Arts & Health intervention for people  
42 post-stroke in the community. The HoS intervention was highly valued by the majority of  
43 people who took part in the HoS groups, with many reporting increased confidence both  
44 within and outside the groups. Some people reported that it was life changing. Study  
45 retention was good, data completion rates high and loss to follow-up low. While only short-  
46 term follow-up was included in this feasibility study, a future definitive study would include  
47 longer term 12 month follow-up. The main outcome measures were acceptable and mostly  
48 completed (sometimes with support). While administering the resource use questionnaire by  
49  
50  
51  
52  
53  
54  
55  
56  
57  
58  
59  
60

1  
2  
3 telephone resulted in high levels of data completeness, maintaining assessor blinding at  
4 follow-up proved challenging, particularly in the Bournemouth centre. To try to improve  
5 assessor blinding success rates, we will add instructions on the printed versions of the  
6 outcome measures that emphasise the importance of not disclosing allocation group and will  
7 reword the question in the resource use questionnaire that asks about contacts with  
8 charities, social or activity groups. We will also seek PPI advice about how we can best  
9 convey the message not to disclose allocation at the start of the telephone resource use  
10 interview and, based on this, will create a standard script. We will provide training for the  
11 blinded assessors.  
12  
13  
14  
15  
16  
17  
18  
19  
20  
21

22 We have used novel dissemination methods such as making a short film involving people  
23 who had attended the HoS groups in Bournemouth, holding an art exhibition in both  
24 Bournemouth and Cambridgeshire to showcase the creations of the HoS group members.  
25 While we did not quite reach our original recruitment target, the overall recruitment rate  
26 (14%) was not unlike that achieved in other similar studies.<sup>55</sup> In the current study, the  
27 recruitment rate in the community setting (28%) was higher than that via hospitals (11%).  
28 This might be because in Cambridgeshire recruitment was undertaken by clinicians working  
29 in the community who often had a long-term relationship with their clients. In contrast, at  
30 Bournemouth and Christchurch hospitals, while some potential participants were known and  
31 approached directly by the research nurses, others were identified from clinical databases  
32 and sent study information in the post.  
33  
34  
35  
36  
37  
38  
39  
40  
41  
42  
43  
44  
45

46 One of the reasons that some people declined participation in the study was because they  
47 felt they were 'not artistic enough' or that 'art was not for them'. However, the HoS  
48 intervention supports people to create a new way of looking at, and develop confidence in, a  
49 new world following stroke; it is about that process of exploration rather than art per se.  
50 Modifying the name of the intervention and the way it is described to participants might be  
51 one way to increase recruitment. Additionally, we could extend the eligibility criteria by  
52  
53  
54  
55  
56  
57  
58  
59  
60

1  
2  
3 providing additional support so that people who require support with toileting needs could  
4 attend, though this would have cost implications. Finally, we could also expand the  
5 recruitment strategy to include primary care. We will continue to consult with service users  
6 and stakeholders to seek their advice on ways of increasing recruitment rates and how best  
7 to convey the essence of the intervention to people.  
8  
9  
10  
11  
12

13  
14 The breaks structured between the HoS sessions were potentially instrumental in  
15 encouraging participants to continue art work outside the group and the links created with  
16 local arts and health practitioners led to some continuing more independent creative practice  
17 after the research ended. Other important practical considerations include ensuring that  
18 venues are on public or community transport routes, have free and disabled car parking  
19 facilities, heating/air conditioning and drink-making facilities. In the full multi-centre trial to  
20 maximise recruitment, and to be as inclusive as possible, transport will be provided, if  
21 required.  
22  
23  
24  
25  
26  
27  
28  
29  
30

31  
32 Some participants reported finding the HISDS-III difficult to complete. For these reasons we  
33 would not include this outcome in a future trial. The ACE-R also proved problematic due to  
34 its heavy reliance on language abilities. It will be important to identify a more appropriate  
35 way to evaluate specific domains of cognitive functioning for the future trial. One possibility is  
36 the recently developed Oxford Cognitive Screen<sup>56</sup> which has been designed specifically with  
37 a stroke population in mind and is purportedly inclusive for individuals with aphasia and  
38 neglect.  
39  
40  
41  
42  
43  
44  
45  
46  
47

48 All four of the possible primary outcome measures for the future trial (WEMWBS, HADS-D,  
49 HADS-A, ICECAP-O) demonstrated change in the direction of benefit for the HoS arm. The  
50 HADS-D is the main contender for the primary outcome in a subsequent definitive trial and  
51 with medium standardised effect sizes it is likely that such a trial would be feasibly sized.  
52  
53  
54  
55  
56  
57  
58  
59  
60

1  
2  
3 The idea for the HoS intervention originated from a stroke survivor (and co-author) (RC) who  
4 had identified a gap in service provision. Since then, Arts & Health approaches are  
5 beginning to be recognised by policy makers as a useful way to support the health and  
6 wellbeing of communities.<sup>24</sup> With NHS pressures and difficulties of accessing formal  
7 services<sup>57</sup> our relatively low cost intervention (which could be as low as £245 per person if  
8 delivered at full capacity) offers potential to form part of a comprehensive long term support  
9 pathway to reduce depression following a stroke and increase community access and  
10 participation. As we look ahead to a future definitive trial it will be important to draw upon  
11 implementation science expertise and to consult with key stakeholders. This will help us to  
12 ensure that the HoS intervention, if found to be effective and cost-effective, can be rolled out  
13 within existing health service and social care structures and is designed in such a way so as  
14 to facilitate its rapid adoption and implementation into practice.  
15  
16  
17  
18  
19  
20  
21  
22  
23  
24  
25  
26  
27

### 28 **Acknowledgements**

29  
30 We would like to thank the Study Sponsor, the Royal Bournemouth and Christchurch  
31 Hospitals (RBCH) NHS Foundation Trust. We would like to acknowledge the Stroke  
32 Research Network Rehabilitation Clinical Subgroup for supporting our initial  
33 development work and the Research Design Service (South West) for providing  
34 invaluable advice on study design, methodology, and grantsmanship. We would like  
35 to thank Elliot Carter from the Peninsula Clinical Trials Unit (PenCTU) at Plymouth University  
36 for designing and implementing a bespoke web-based randomisation system. We would  
37 like to thank the PPI group and Dr Catherine Ford for providing key input into  
38 aspects of study design, outcome measures and study materials. We would also like  
39 to thank Dr Susan Hunter, Professor Fiona Jones and Catherine Ovington for  
40 agreeing to be members of the Study Steering group. We would like to thank the Stroke  
41 Research team at RBCH and the Community Neuro-rehabilitation teams in Cambridgeshire  
42 for their invaluable help with recruitment. We would like to thank all the participants who took  
43 part and for their contributions to dissemination activities including a video, press releases  
44  
45  
46  
47  
48  
49  
50  
51  
52  
53  
54  
55  
56  
57  
58  
59  
60

1  
2  
3 and interviews, art exhibitions held in each centre and a workshop at the UK National Stroke  
4 Forum and to FB and MDBD for the images of their work. Finally we would like to  
5  
6 acknowledge and extend our thanks to the National Institute for Health Research who  
7  
8 funded this study through the Research for Patient Benefit programme.  
9

### 10 11 12 **Contributors**

13  
14 CEH (Chief Investigator), FG (Principal Investigator, Cambridge Centre), CLR and RC were  
15  
16 involved in the conception of the study and CEH, ST and FG led the design. CEH with ST  
17  
18 and FG led the writing of initial grant application and protocol. DJ and FG advised on clinical  
19  
20 aspects related to the grant application, PT led the statistical component of the study, EM led  
21  
22 the economic evaluation, supported by TP and KG and FR advised on the qualitative  
23  
24 aspects. MG and SN refined aspects of the draft protocol. MG coordinated the study on a  
25  
26 day-to-day basis. CT and AW organised and administered the blinded assessments. ST and  
27  
28 CEH drafted the manuscript, FG, MG, PT and EM provided detailed feedback and all other  
29  
30 authors critically reviewed and approved the final version.  
31  
32  
33

### 34 **Competing interests**

35  
36 None  
37  
38  
39

### 40 **Funding**

41  
42 This paper presents independent research funded by the National Institute for Health  
43  
44 Research (NIHR) under its Research for Patient Benefit (RfPB) Programme (Grant  
45  
46 Reference Number PB-PG-0212-27054). The views expressed are those of the  
47  
48 author(s) and not necessarily those of the NHS, the NIHR or the Department of  
49  
50 Health. This study is included in the National Institute of Health Research Clinical  
51  
52 Network (NIHR CRN) portfolio.  
53  
54  
55  
56  
57  
58  
59  
60

We were awarded funding from the National NIHR-SRN Rehabilitation Clinical Subgroup to bring the research team together and prepare the grant application. FG was supported by NIHR Flexibility and Sustainability Funding via Cambridgeshire Primary Care Trust R&D Department.

### Ethics approval

Ethics approval was granted by the Exeter NRES Committee (REC Ref 13/SW/0136) on 30/07/13. Local Research and Development approval was granted by the Royal Bournemouth and Christchurch Hospital NHS Foundation Trust on 06/05/14. This Trust is the study sponsor. Local Research and Development approval was granted by Cambridgeshire Community Services NHS Trust on 29/05/14.

### Provenance and peer review

Not commissioned; peer reviewed for ethical and funding approval prior to submission.

### Data Sharing Statement:

Requests for de-identified data should be directed to the corresponding author.

**Table 1: Baseline clinical and demographic descriptives for the sample**

| Descriptor                         | Usual Care (UC)<br>(n=27) | HeART of Stroke (HoS)<br>(n=29) | Entire cohort<br>(n=56) |
|------------------------------------|---------------------------|---------------------------------|-------------------------|
| <b>Gender [n (%)]</b>              |                           |                                 |                         |
| ▪ Female; Male                     | 7 (26%); 20 (74%)         | 17 (59%); 12 (41%)              | 24 (43%); 32 (57%)      |
| <b>Age (years) Mean (SD) range</b> | 67.4 (12.83) 39-88        | 72.0 (11.22) 27-87              | 69.8 (12.1) 27-88       |
| <b>Ethnicity</b>                   |                           |                                 |                         |
| ▪ White English                    | 25 (93%)                  | 23 (79%)                        | 48 (86%)                |

| Descriptor                                                        | Usual Care (UC)<br>(n=27) | HeART of Stroke (HoS)<br>(n=29) | Entire cohort<br>(n=56) |
|-------------------------------------------------------------------|---------------------------|---------------------------------|-------------------------|
| ▪ White other British                                             | 1 (4%)                    | 5 (17%)                         | 6 (11%)                 |
| ▪ Mixed- white and Asian                                          | 1 (4%)                    | -                               | 1 (2%)                  |
| ▪ Black or Black British – African                                | -                         | 1 (3%)                          | 1 (2%)                  |
| <b>Time since stroke (months) Median (IQR) range*</b>             | 7 (5) 2-19                | 7 (7) 1-32                      | 7 (5) 1-32              |
| <b>Stroke type [n (%)]</b>                                        |                           |                                 |                         |
| ▪ Ischaemic/thrombotic                                            | 6 (22%)                   | 5 (17%)                         | 11 (20%)                |
| ▪ Ischaemic/embolic                                               | 1 (4%)                    | 1 (3%)                          | 2 (4%)                  |
| ▪ Haemorrhagic/Intracerebral                                      | 2 (7%)                    | 2 (7%)                          | 4 (7%)                  |
| ▪ Haemorrhagic subarachnoid                                       | -                         | 1 (3%)                          | 1 (2%)                  |
| ▪ Ischaemic/type unknown                                          | 13 (48%)                  | 16 (55%)                        | 29 (52%)                |
| ▪ Haemorrhagic/type unknown                                       | 4 (15%)                   | 3 (10%)                         | 7 (13%)                 |
| ▪ Type unknown                                                    | 1 (4%)                    | 1 (3%)                          | 2 (4%)                  |
| <b>Stroke severity (Rivermead Gross motor assessment) [n (%)]</b> |                           |                                 |                         |
| Total Score ≤ 6                                                   | 1 (4%)                    | 2 (7%)                          | 3 (5%)                  |
| Total Score ≥ 7                                                   | 26 (96%)                  | 27 (93%)                        | 53 (95%)                |
| <b>Stroke side [n (%)]</b>                                        |                           |                                 |                         |
| ▪ Left CVA                                                        | 11 (42%)                  | 15 (52%)                        | 26 (47%)                |
| ▪ Right CVA                                                       | 13 (50%)                  | 11 (38%)                        | 24 (44%)                |
| ▪ Both sides                                                      | 1 (4%)                    | 3 (10%)                         | 4 (7%)                  |
| ▪ Not applicable                                                  | 1 (4%)                    | -                               | 1 (2%)                  |
| ▪ System missing                                                  | 1                         | -                               | 1                       |
| <b>Centre [n (%)]</b>                                             |                           |                                 |                         |
| ▪ Bournemouth                                                     | 16 (59%)                  | 17 (59%)                        | 33 (59%)                |
| ▪ Cambridgeshire                                                  | 11 (41%)                  | 12 (41%)                        | 23 (41%)                |
| <b>Level of education [n (%)]</b>                                 |                           |                                 |                         |
| Highest qualification achieved:                                   |                           |                                 |                         |
| ▪ No qualifications                                               | 3 (12%)                   | 8 (30%)                         | 11 (20%)                |
| ▪ One or more GCSE                                                | 4 (16%)                   | 4 (15%)                         | 8 (14%)                 |
| ▪ One or more A level                                             | 5 (20%)                   | 1 (4%)                          | 6 (11%)                 |
| ▪ First degree or higher                                          | 1 (4%)                    | 5 (19%)                         | 6 (11%)                 |
| ▪ Other                                                           | 12 (48%)                  | 9 (33%)                         | 21 (38%)                |
| ▪ System missing                                                  | 2                         | 2                               | 4 (7%)                  |
| <b>Pre-stroke employment status</b>                               |                           |                                 |                         |
| ▪ Retired                                                         | 14 (52%)                  | 25 (86%)                        | 39 (70%)                |
| ▪ Full-time employment                                            | 3 (11%)                   | 1 (3%)                          | 4 (7%)                  |
| ▪ Part-time employment                                            | 3 (11%)                   | 1 (3%)                          | 4 (7%)                  |
| ▪ Self-employed                                                   | 2 (7%)                    | 1 (3%)                          | 3 (5%)                  |
| ▪ Other (unemployed; homemaker)                                   | 5 (19%)                   | 1 (3%)                          | 6 (11%)                 |
| <b>Marital status [n (%)]</b>                                     |                           |                                 |                         |
| ▪ Single                                                          | 4 (15%)                   | 3 (10%)                         | 7 (13%)                 |
| ▪ Married/cohabiting                                              | 17 (63%)                  | 13 (45%)                        | 30 (54%)                |
| ▪ Separated/divorced                                              | 3 (11%)                   | 3 (10%)                         | 6 (11%)                 |
| ▪ Widowed                                                         | 3 (11%)                   | 10 (34%)                        | 13 (23%)                |
| <b>Household composition</b>                                      |                           |                                 |                         |
| ▪ Living alone                                                    | 9 (33%)                   | 13 (45%)                        | 23 (41%)                |
| ▪ Living with others                                              | 18 (67%)                  | 15 (52%)                        | 32 (57%)                |
| ▪ Sheltered housing                                               | -                         | 1 (3%)                          | 1 (2%)                  |
| <b>Taking medication for mood</b>                                 |                           |                                 |                         |
| ▪ No                                                              | 21 (78%)                  | 24 (86%)                        | 10 (18%)                |
| ▪ Yes                                                             | 6 (22%)                   | 4 (14%)                         | 45 (82%)                |
| ▪ System missing                                                  | -                         | 1                               | 1                       |
| <b>Communication difficulties†</b>                                |                           |                                 |                         |
| ▪ No                                                              | 18 (67%)                  | 12 (59%)                        | 30 (54%)                |
| ▪ Yes                                                             | 9 (33%)                   | 17 (41%)                        | 26 (46%)                |
| <b>Motricity Index Total Score*</b>                               |                           |                                 |                         |
| Median (IQR) N                                                    | 86.3 (27) 12-100, 27      | 81.0 (29) 1-100, 29             | 83.6 (27) 56            |

\*NB for one case one item was missing and



1  
2  
3  
4  
5  
6  
7  
8  
9  
10  
11  
12  
13  
14  
15  
16  
17  
18  
19  
20  
21  
22  
23  
24  
25  
26  
27  
28  
29  
30  
31  
32  
33  
34  
35  
36  
37  
38  
39  
40  
41  
42  
43  
44  
45  
46  
47  
48  
49  
50  
51  
52  
53  
54  
55  
56  
57  
58  
59  
60

| Descriptor | Usual Care (UC) | HeART of Stroke (HoS) | Entire cohort |
|------------|-----------------|-----------------------|---------------|
|            | (n=27)          | (n=29)                | (n=56)        |

*was replaced by the mean*

\*Although the inclusion criterion for the study was  $\leq 24$  months post stroke we erroneously recruited one participant at 32 months post stroke and this participant's data are included in the analysis.

For peer review only

**Table 2: Descriptives and preliminary estimates of effect size for potential primary outcomes**

| Outcome measure                                                                                                                                | Baseline<br>N=56 | Mean<br>difference<br>(95% CI) | Post<br>N=47    | Standardised<br>Effect Size<br>(Cohen's <i>d</i> ) |
|------------------------------------------------------------------------------------------------------------------------------------------------|------------------|--------------------------------|-----------------|----------------------------------------------------|
| <b>Warwick and Edinburgh Mental Well Being Scale (WEMWBS)</b> (potential range 14-70, higher scores greater wellbeing)                         |                  |                                |                 |                                                    |
| UC mean (SD) N                                                                                                                                 | 48.8 (10.64) 26  |                                | 48.0 (8.40) 21  |                                                    |
| HoS mean (SD) N                                                                                                                                | 46.9 (8.94) 29   |                                | 48.4 (10.28) 25 |                                                    |
| Mean diff [95% CI] in change from baseline (unadjusted)                                                                                        |                  | 2.25 [-2.83, 7.32]             |                 | 0.23                                               |
| Mean diff [95% CI] in change from baseline (adjusted for centre & baseline score)                                                              |                  | 1.14 [-3.42, 5.70]             |                 | 0.12                                               |
| <b>Hospital Anxiety and Depression Scale (HADS) Anxiety subscale</b> (potential range 0-21 each subscale, higher scores greater anxiety)       |                  |                                |                 |                                                    |
| UC mean (SD) N                                                                                                                                 | 7.4 (3.72) 27    |                                | 7.0 (4.13) 22   |                                                    |
| HoS mean (SD) N                                                                                                                                | 7.2 (4.29) 29    |                                | 6.3 (3.74) 25   |                                                    |
| Mean diff [95% CI] in change from baseline (unadjusted)                                                                                        |                  | -0.47 [-2.48, 1.54]            |                 | -0.12                                              |
| Mean diff [95% CI] in change from baseline (adjusted for centre & baseline score)                                                              |                  | -0.55 [-2.39, 1.28]            |                 | -0.14                                              |
| <b>Hospital Anxiety and Depression Scale (HADS) Depression subscale</b> (potential range 0-21 each subscale, higher scores greater depression) |                  |                                |                 |                                                    |
| UC mean (SD) N                                                                                                                                 | 4.8 (2.68) 27    |                                | 6.1 (3.33) 22   |                                                    |
| HoS mean (SD) N                                                                                                                                | 6.6 (3.76) 29    |                                | 6.0 (4.18) 25   |                                                    |
| Mean diff [95% CI] in change from baseline (unadjusted)                                                                                        |                  | -1.82 [-3.42, -0.22]           |                 | -0.56                                              |
| Mean diff [95% CI] in change from baseline (adjusted for centre & baseline score)                                                              |                  | -1.46 [-3.12, 0.21]            |                 | -0.45                                              |
| <b>ICECAP-A tariff</b> (potential range 0-1, higher scores greater capability)                                                                 |                  |                                |                 |                                                    |
| UC mean (SD) N                                                                                                                                 | 0.81 (0.14) 26   |                                | 0.78 (0.15) 21  |                                                    |
| HoS mean (SD) N                                                                                                                                | 0.75 (0.16) 29   |                                | 0.76 (0.22) 25  |                                                    |
| Mean diff [95% CI] in change from baseline (unadjusted)                                                                                        |                  | 0.05 [-0.03, 0.13]             |                 | 0.33                                               |
| Mean diff [95% CI] in change from baseline (adjusted for centre & baseline score)                                                              |                  | 0.04 [-0.05, 0.12]             |                 | 0.26                                               |

Where high scores indicate better outcomes, positive effect sizes suggest benefit for the HoS arm.

Where low scores indicate better outcomes, negative effect sizes suggest benefit for the HoS arm.

**Table 3: Completeness of resource use data**

|                                       | <b>N<br/>complete<br/>data</b> | <b>% of<br/>questionnaires<br/>filled in<br/>(n=25)</b> | <b>% of<br/>sample<br/>(n=29)</b> | <b>N<br/>complete<br/>data</b> | <b>% of<br/>questionnaires<br/>filled in<br/>(n=25)</b> | <b>% of<br/>sample<br/>(n=27)</b> |
|---------------------------------------|--------------------------------|---------------------------------------------------------|-----------------------------------|--------------------------------|---------------------------------------------------------|-----------------------------------|
|                                       | <b>Intervention</b>            |                                                         |                                   | <b>Usual Care</b>              |                                                         |                                   |
| <b>Health and social care</b>         |                                |                                                         |                                   |                                |                                                         |                                   |
| Outpatient visits                     | 25                             | 100%                                                    | 86%                               | 25                             | 100%                                                    | 93%                               |
| Inpatient visits                      | 25                             | 100%                                                    | 86%                               | 25                             | 100%                                                    | 93%                               |
| Community based services              | 21                             | 84%                                                     | 72%                               | 24                             | 96%                                                     | 89%                               |
| Personal social services              | 25                             | 100%                                                    | 86%                               | 24                             | 96%                                                     | 89%                               |
| Total health and social care          | 21                             | 84%                                                     | 72%                               | 23                             | 92%                                                     | 85%                               |
| <b>Further resource use collected</b> |                                |                                                         |                                   |                                |                                                         |                                   |
| Time off work                         | 25                             | 100%                                                    | 86%                               | 23                             | 92%                                                     | 85%                               |
| Time off normal activities            | 25                             | 100%                                                    | 86%                               | 25                             | 100%                                                    | 93%                               |
| Hours of help per week                | 21                             | 84%                                                     | 72%                               | 24                             | 96%                                                     | 89%                               |
| Private therapies used                | 25                             | 100%                                                    | 86%                               | 25                             | 100%                                                    | 93%                               |
| Charity/support group contacts        | 25                             | 100%                                                    | 86%                               | 25                             | 100%                                                    | 93%                               |

**Table 4: HoS delivery costs**

| <b>Cost of delivering HoS</b>                            | <b>Bournemouth</b> | <b>Cambridgeshire</b> |
|----------------------------------------------------------|--------------------|-----------------------|
| <i>Costs for 10 sessions</i>                             |                    |                       |
| Artist fee                                               | £1,200             | £1,200                |
| Venue cost                                               | £430               | £1,000                |
| Materials cost                                           | £330               | £330                  |
| <b>Total</b>                                             | <b>£1,960</b>      | <b>£2,530</b>         |
| Mean no. of participants per session                     | 6.0                | 3.85                  |
| Cost of HoS per participant (based on mean attendance)   | £327               | £657                  |
| Cost of HoS per participant at capacity (8 attendees)    | £245               | £316                  |
| <b>Reporting micro-level resource use to deliver HoS</b> |                    |                       |
| <i>Artist time (in mean hours):</i>                      |                    |                       |
| Session duration                                         | 20.0               | 20.5                  |
| Preparation time                                         | 20.0               | 10.6                  |
| Travel time                                              | 15.0               | 15.6                  |
| <b>Total intervention time</b>                           | <b>55.0</b>        | <b>46.7</b>           |
| Participant travel costs                                 | £1,021             | £658                  |

**Table 5: Outcomes resource use and cost of delivering care in both arms**

|                                    | HoS Intervention |         |          |      |           |      | Usual care |         |          |      |           |      |
|------------------------------------|------------------|---------|----------|------|-----------|------|------------|---------|----------|------|-----------|------|
|                                    | N                | N users | Mean use | SD   | Mean cost | SD   | N          | N users | Mean use | SD   | Mean cost | SD   |
| <b>Outcomes</b>                    |                  |         |          |      |           |      |            |         |          |      |           |      |
| QALYs gained (SF6D)                | 22               | -       | 0.18     | 0.03 | -         | -    | 21         | -       | 0.17     | 0.02 | -         | -    |
| <b>Inpatient and A &amp; E</b>     |                  |         |          |      |           |      |            |         |          |      |           |      |
| Inpatient admissions               | 25               | 3       | 0.9      | 3.0  | £49       | £136 | 25         | 3       | 0.7      | 2.8  | £96       | £308 |
| A & E or hospital admissions       | 25               | 4       | 0.2      | 0.4  | £22       | £53  | 25         | 6       | 0.2      | 0.4  | £34       | £61  |
| <b>Outpatient appointments</b>     |                  |         |          |      |           |      |            |         |          |      |           |      |
| Stroke rehabilitation              | 25               | 1       | 0.0      | 0.2  | £10       | £50  | 25         | 2       | 0.1      | 0.3  | £20       | £69  |
| Physiotherapy                      | 25               | 3       | 0.3      | 1.2  | £6        | £23  | 25         | 4       | 1.0      | 2.9  | £20       | £56  |
| Occupational therapy               | 25               | 1       | 0.0      | 0.2  | £1        | £4   | 25         | 3       | 0.2      | 0.5  | £3        | £9   |
| Speech and language therapy        | 25               | 2       | 0.2      | 0.8  | £4        | £16  | 25         | 2       | 0.4      | 1.6  | £7        | £30  |
| Psychologist                       | 25               | 0       | 0.0      | 0.0  | £0        | £0   | 25         | 0       | 0.0      | 0.0  | £0        | £0   |
| Dietician                          | 25               | 0       | 0.0      | 0.0  | £0        | £0   | 25         | 0       | 0.0      | 0.0  | £0        | £0   |
| Other outpatient appointments      | 25               | 14      | 1.2      | 1.5  | £140      | £210 | 25         | 13      | 2.0      | 3.2  | £196      | £393 |
| <b>Community-based services</b>    |                  |         |          |      |           |      |            |         |          |      |           |      |
| GP contacts                        | 24               | 17      | 1.9      | 1.5  | £92       | £79  | 25         | 18      | 1.6      | 2.0  | £72       | £83  |
| GP nurse contacts                  | 25               | 11      | 1.6      | 3.0  | £22       | £44  | 25         | 16      | 2.0      | 3.1  | £26       | £40  |
| Physiotherapy contacts             | 25               | 3       | 0.3      | 1.2  | £6        | £23  | 25         | 2       | 0.9      | 3.7  | £19       | £78  |
| SALT contacts                      | 24               | 3       | 0.4      | 1.3  | £25       | £82  | 25         | 3       | 1.1      | 3.5  | £94       | £308 |
| Occupational therapy at home       | 25               | 1       | 0.2      | 0.8  | £5        | £25  | 25         | 2       | 0.2      | 0.9  | £7        | £27  |
| Repeat prescriptions from GP       | 23               | 16      | 4.0      | 5.6  | £5        | £7   | 24         | 18      | 4.0      | 4.3  | £5        | £5   |
| Other community-based appointments | 21               | 2       | 0.4      | 1.4  | £25       | £77  | 24         | 1       | 0.3      | 1.6  | £28       | £143 |
| <b>Personal social services</b>    |                  |         |          |      |           |      |            |         |          |      |           |      |
| Home care worker contacts          | 25               | 0       | 0.0      | 0.0  | £0        | £0   | 24         | 2       | 0.9      | 3.4  | £11       | £41  |
| Social worker contacts (hours)     | 25               | 2       | 0.4      | 1.6  | £28       | £127 | 25         | 3       | 0.3      | 0.9  | £24       | £72  |
| Food at home services (meals)      | 25               | 0       | 0.0      | 0.0  | £0        | £0   | 25         | 1       | 0.6      | 3.2  | £4        | £21  |

## References

1. Townsend N, Wickramasinghe K, Bhatnagar P, et al. Coronary heart disease statistics. A compendium of health statistics. 2012 Edn. London: British Heart Foundation, 2012.
2. Department of Health. National stroke strategy. London: Department of Health, 2007.
3. Salter K, Hellings C, Foley N, et al. The experience of living with stroke: a qualitative meta-synthesis. *J Rehabil Med* 2008;40:595–602.
4. Hole E, Stubbs B, Roskell C, Soundy A. The patient's experience of the psychosocial process that influences identity following stroke rehabilitation: a metaethnography. *Scientific World Journal* 2014;2014:349151
5. Levack WMM, Kayes NM, Fadyl JK. Experience of recovery and outcome following traumatic brain injury: a metasynthesis of qualitative research. *Disabil Rehabil* 2010;32:986–99.
6. Pollock A, St George B, Fenton M, Firkins L. Top ten research priorities relating to life after stroke. *Lancet Neurol* 2012;11:209. doi: 10.1016/S1474-4422(12)70029-7.
7. Ayerbe L, Salma A, Wolfe CD, Rudd AD. Natural history, predictors and outcomes of depression after stroke: Systematic review and meta-analysis. *The Br J Psychiatry* 2013; 202:14-21.
8. Cant R. Rehabilitation following a stroke: a participant perspective. *Disabil Rehabil* 1997;19:297–304.

- 1  
2  
3 9. Gracey F, Palmer S, Rous B, et al. "Feeling part of things": personal construction of self  
4 after brain injury. *Neuropsychol Rehabil* 2008;18:627–50.  
5  
6  
7  
8  
9 10. Haslam C, Holme A, Haslam SA, et al. Maintaining group memberships: social identity  
10 continuity predicts well-being after stroke. *Neuropsychol Rehabil* 2008;18:671–91.  
11  
12  
13  
14  
15 11. Bulley C, Shiels J, Wilkie K, et al. Carer experiences of life after stroke—a qualitative  
16 analysis. *Disabil Rehabil* 2010;32:1406–13.  
17  
18  
19  
20  
21 12. Rigby H, Gubitz G, Eskes G, et al. Caring for stroke survivors: baseline and 1-year  
22 determinants of caregiver burden. *Int J Stroke* 2009;4:152–8.  
23  
24  
25  
26  
27 13. Saka O, MCGuire A, Wolfe C. Cost of stroke in the United Kingdom. *Age Ageing*  
28 2009;38:27–32.  
29  
30  
31  
32  
33 14. Gainotti, G, Antonucci G, Marra C, & Paolucci S. Relation between depression after  
34 stroke, antidepressant therapy, and functional recovery. *J Neurol Neurosurg Psychiatry*  
35 2001; 71: 258-261.  
36  
37  
38  
39  
40 15. Ellis-Hill C, Payne S, Ward C. Using stroke to explore the life thread model: an  
41 alternative approach to rehabilitation. *Disabil Rehabil* 2008;30:150–9.  
42  
43  
44  
45  
46 16. Gracey F, Evans JJ and Malley D. Capturing process and outcome in complex  
47 rehabilitation interventions: a 'Y-shaped' model. *Neuropsychol Rehabil* 2009; 19: 867-890.  
48  
49  
50  
51  
52  
53  
54  
55  
56  
57  
58  
59

- 1  
2  
3 17. Todres L. Being with that: the relevance of embodied understanding for practice. *Qual*  
4 *Health Res* 2008;18:1566–73.  
5  
6  
7  
8  
9 18. Eilertsen G, Kirkevold M, Bjork IT. Recovering from a stroke:a longitudinal, qualitative  
10 study of older Norwegian women. *J Clin Nurs* 2010;19:2004–13.  
11  
12  
13  
14  
15 19. Kneebone I. Stepped psychological care after stroke. *Disabil Rehabil* 2016; 38:1836-  
16 1843.  
17  
18  
19  
20  
21 20. Hackett ML, Anderson CS, House A, Halteh C. Interventions for preventing depression  
22 after stroke. *Cochrane Database of Systematic Reviews* 2008, Issue 3. Art. No.: CD003689.  
23 DOI: 10.1002/14651858.CD003689.pub3.  
24  
25  
26  
27  
28 21. Harrison MA, Ryan A, Gardiner C. et al. Psychological and emotional needs,  
29 assessment and support post-stroke: a multi-perspective qualitative study. *Top Stroke*  
30 *Rehabil* 2017; 24:.119-125.  
31  
32  
33  
34  
35  
36 22. White J, Magin P, Attia J. et al. Predictors of health-related quality of life in community-  
37 dwelling stroke survivors: a cohort study. *Fam Pract*. 2016 33:382-7. doi:  
38 10.1093/fampra/cmw011. Epub 2016 Mar 15.  
39  
40  
41  
42  
43 23. Stickley T, Parr H, Atkinson S, Daykin N, Clift S, De Nora T, Hacking S, Camic PM, Joss  
44 T, White M, Hogan SJ Arts, health & wellbeing: reflections on a national seminar series and  
45 building a UK research network *Arts & Health* 2017, 9:1, 14-25, DOI:  
46 10.1080/17533015.2016.1166142.  
47  
48  
49  
50  
51  
52 24. All-Party Parliamentary Group on Arts, Health and Wellbeing. (2017). *Creative Health:*  
53 *The Arts for Health and Wellbeing*. Available at:  
54 <http://www.artshealthandwellbeing.org.uk/appg-inquiry>  
55  
56  
57  
58  
59  
60



- 1  
2  
3  
4  
5 25. Murray M, Gray R. Health psychology and the arts: a conversation. *J Health Psychol*  
6 2008;13:147–53.  
7  
8  
9  
10  
11 26. Van Lith T, Schofield MJ, Fenner P. Identifying the evidence-base for art-based practices  
12 and their potential benefit for mental health recovery: A critical review. *Disabil Rehabil* 2013;  
13 35(16): 1309-1323.  
14  
15  
16  
17  
18 27. Roe, B. Arts for health initiatives: an emerging international agenda and evidence base  
19 for older populations. *J Adv Nurs* 2014, 70: 1–3. doi:10.1111/jan.12216.  
20  
21  
22  
23  
24 28. Davies CR, Knuiman M, Wright P, et al. The art of being healthy: a qualitative study to  
25 develop a thematic framework for understanding the relationship between health and the  
26 arts. *BMJ Open* 2014;4:e004790. doi:10.1136/bmjopen-2014-004790  
27  
28  
29  
30  
31  
32 29. Baumann M, Peck S, Collins C, et al. The meaning and value of taking part in a person  
33 centred arts programme to hospital-based stroke patients: findings from a qualitative study.  
34 *Disabil Rehabil* 2012;35:244–56.  
35  
36  
37  
38  
39 30. Ali K, Gammidge T and Waller D. Fight like a ferret: A novel approach of using art  
40 therapy to reduce anxiety in stroke patients undergoing hospital rehabilitation *Med Humanit*  
41 2014; 40: 56-60.  
42  
43  
44  
45  
46  
47 31. Kongkasauwan R, Voraakhom K, Pisolayabutra P., et al. Creative art therapy to enhance  
48 rehabilitation for stroke patients: a randomized controlled trial. *Clin Rehabil.* 2016 Oct;  
49 30(10):1016-1023. Epub 2015 Sep 22.  
50  
51  
52  
53  
54 32. Morris J, Kelly C, Toma M., et al. Feasibility study of the effects of art as a creative  
55 engagement intervention during stroke rehabilitation on improvement of psychosocial  
56  
57  
58  
59  
60

1  
2  
3 outcomes: study protocol for a single blind randomized controlled trial: the ACES study.  
4 Trials 2014.15:380 DOI: 10.1186/1745-6215-15-380.  
5  
6  
7

8  
9 33. Ellis-Hill C, Gracey F, Thomas S, Lamont-Robinson C, Thomas PW, Marques EMR,  
10 Grant M, Nunn, S, Cant RI, Galvin KT, Reynolds F, Jenkinson D. HeART of Stroke (HoS)', a  
11 community-based Arts for Health group intervention to support self-confidence and  
12 psychological well-being following a stroke: protocol for a randomised controlled feasibility  
13 study BMJ Open 2015;5:8 e008888 doi:10.1136/bmjopen-2015-008888.  
14  
15  
16

17  
18  
19 34. Lincoln N, Leadbitter D. Assessment of motor function in stroke patients. *Physiotherapy*  
20 1979;65:48–51.  
21  
22

23  
24  
25 35. Doosje B, Ellemers N, Spears R. Perceived intragroup variability as a function of group  
26 status and identification. *J Exp Soc Psychol* 1995;31:410–36.  
27  
28

29  
30  
31 36. Demeurisse G, Demol O, Robaye E. Motor evaluation in vascular hemiplegia. *Eur Neurol*  
32 1980;19:382–9.  
33  
34

35  
36  
37 37. Goodglass H, Kaplan E, Barresi B. *The Boston Diagnostic Aphasia Examination (BDAE)*.  
38 3rd edn. Baltimore: Lippincott Williams & Wilkins, 2001.  
39  
40

41  
42  
43 38. Mioshi E, Dawson K, Mitchell J, et al. The Addenbrooke's Cognitive Examination  
44 Revised: a brief cognitive test battery for dementia screening. *Int J Geriatr Psychiatry*  
45 2006;21:1078–85.  
46  
47  
48

49  
50  
51 39. Tennant R, Hiller L, Fishwick R, et al. The Warwick-Edinburgh Mental Well-being Scale  
52 (WEMWBS): development and UK validation. *Health Qual Life Out* 2007;16:606–13.  
53  
54  
55

1  
2  
3 40. Zigmond AS, Snaith RP. The Hospital Anxiety and Depression Scale. *Acta Psychiat*  
4 *Scand* 1983;67:361–70.  
5

6  
7  
8  
9 41. Al-Janabi H, Flynn TN, Coast J. Development of a self-report measure of capability  
10 wellbeing for adults: the ICECAP-A. *Qual Life Res* 2012;21:167–76.  
11

12  
13  
14 42. Rosenberg M. *Society and the adolescent self-image*. Princeton, NJ: Princeton  
15 University Press, 1965.  
16

17  
18  
19  
20  
21 43. Ware JE, Sherbourne CD. The MOS 36-item Short-Form health survey (SF-36): I.  
22 Conceptual framework and item selection. *Med Care* 1992;30:473–83.  
23

24  
25  
26  
27 44. Tyerman A, Humphrey M. Changes in self-concept following severe head injury. *Int J*  
28 *Rehabil Res* 1984;7:11–23.  
29

30  
31  
32  
33 45. Marques, EMR, Johnson EC, Goberman-Hill R, Blom AW & Noble SM. Resource Use  
34 Logs to Reduce the Amount of Missing Data in Economic Evaluations Alongside Trials.  
35 *Value Health* 2013;16:195-201.  
36

37  
38  
39  
40 46. Curtis L, Burns A. *Unit Costs of Health and Social Care 2015*, Personal Social Services  
41 Research Unit, University of Kent, Canterbury. 2015.  
42

43  
44  
45  
46 47. Department of Health. *NHS Reference Costs 2014–2015*. National Schedule of  
47 Reference Costs. London: Department of Health; 2015.  
48

49  
50  
51  
52 48. Office for National statistics. *Average weekly earnings dataset*. 2015.  
53  
54  
55  
56  
57  
58  
59  
60

1  
2  
3 49. Lancaster GA, Dodd S, Williamson PR. Design and analysis of pilot studies:  
4 recommendations for good practice. *J Eval Clin Pract* 2004;10:307–12.  
5  
6  
7

8  
9 50. Lee KI, Thompson SG. The use of random effects models to allow for clustering in  
10 individually randomized trials. *Clin Trials* 2005; 2: 163-173.  
11  
12

13  
14 51. Flynn TN, Huynh E, Peters TJ, Al-Janabi H, Moody A, Clemens S, Coast J. Scoring the  
15 ICECAP-A capability instrument. Estimation of a UK general population tariff. *Health*  
16 *Economics*.  
17  
18

19  
20 52. John Brazier, Jennifer Roberts, Mark Deverill, The estimation of a preference-based  
21 measure of health from the SF-36, In *Journal of Health Economics* 2002; 21(2): 271-292.  
22  
23  
24

25  
26 53. Hsieh H-F, Shannon SE. Three Approaches to Qualitative Content Analysis. *Qual Health*  
27 *Res* 2005;15:1277-1288.  
28  
29  
30

31  
32 54. Braun V, Clarke V. Using thematic analysis in psychology. *Qual Res Psychol* 2006; 3:77-  
33 101.  
34  
35  
36

37  
38 55. McKenna S, Jones F, Glenfield P, et al. Bridges self-management programme for people  
39 with stroke in the community: a feasibility randomised controlled trial. *Int J Stroke*  
40 *2015;10:697–704*.  
41  
42  
43  
44

45  
46 56. Demeyere N, Riddoch MJ, Slavkova ED, Bickerton WL2, Humphreys GW. The Oxford  
47 Cognitive Screen (OCS): validation of a stroke-specific short cognitive screening tool.  
48 *Psychol Assess*. 2015;27:883-94. doi: 10.1037/pas0000082. Epub 2015 Mar 2.  
49  
50  
51  
52

1  
2  
3 57. Stroke Association New Era for Stroke report. Available: [https://www.stroke.org.uk/take-](https://www.stroke.org.uk/take-action/our-campaigns/new-era-stroke)  
4 action/our-campaigns/new-era-stroke 2016 Last accessed 13 June 2017.  
5  
6  
7

8  
9 **Figure Legends:**

10 Figure 1: Consolidated Standards of Reporting Trials (CONSORT) diagram

11  
12  
13 Figure 2: Painting by MDBD

14  
15 Figure 3: Drawing by FB  
16  
17  
18  
19  
20  
21  
22  
23  
24  
25  
26  
27  
28  
29  
30  
31  
32  
33  
34  
35  
36  
37  
38  
39  
40  
41  
42  
43  
44  
45  
46  
47  
48  
49  
50  
51  
52  
53  
54  
55  
56  
57  
58  
59  
60

1  
2  
3  
4  
5  
6  
7  
8  
9  
10  
11  
12  
13  
14  
15  
16  
17  
18  
19  
20  
21  
22  
23  
24  
25  
26  
27  
28  
29  
30  
31  
32  
33  
34  
35  
36  
37  
38  
39  
40  
41  
42  
43  
44  
45  
46  
47  
48  
49  
50  
51  
52  
53  
54  
55  
56  
57  
58  
59  
60

Figure 1: Consolidated Standards of Reporting Trials (CONSORT) diagram

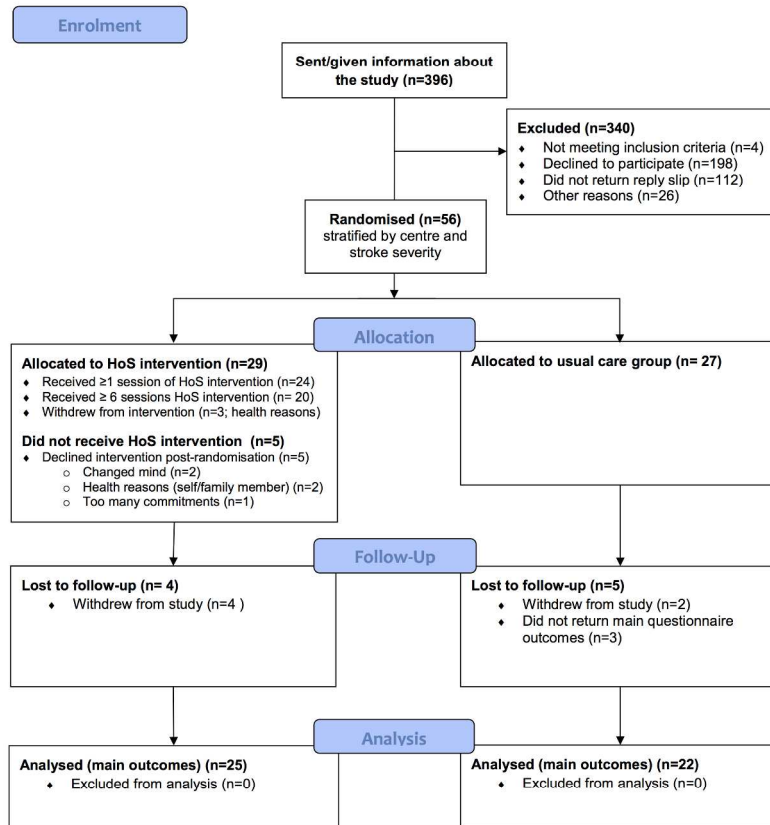

Figure 1: Consolidated Standards of Reporting Trials (CONSORT) diagram

209x297mm (300 x 300 DPI)

1  
2  
3  
4  
5  
6  
7  
8  
9  
10  
11  
12  
13  
14  
15  
16  
17  
18  
19  
20  
21  
22  
23  
24  
25  
26  
27  
28  
29  
30  
31  
32  
33  
34  
35  
36  
37  
38  
39  
40  
41  
42  
43  
44  
45  
46  
47  
48  
49  
50  
51  
52  
53  
54  
55  
56  
57  
58  
59  
60

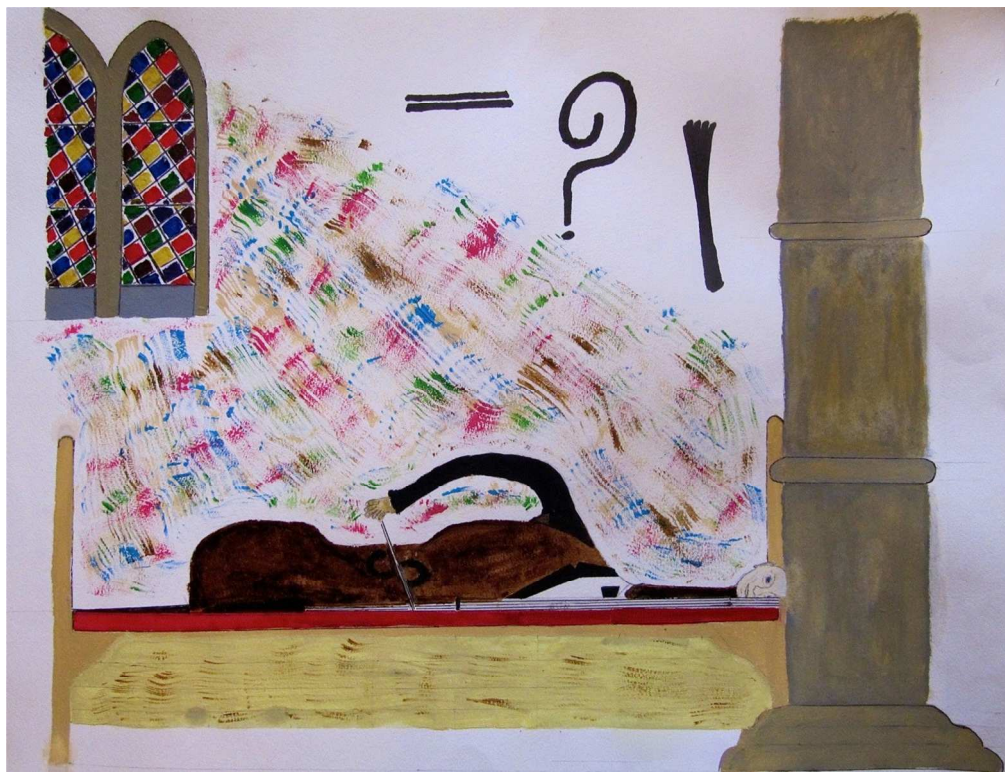

Painting by MDBD

159x121mm (220 x 220 DPI)

Peer review only

1  
2  
3  
4  
5  
6  
7  
8  
9  
10  
11  
12  
13  
14  
15  
16  
17  
18  
19  
20  
21  
22  
23  
24  
25  
26  
27  
28  
29  
30  
31  
32  
33  
34  
35  
36  
37  
38  
39  
40  
41  
42  
43  
44  
45  
46  
47  
48  
49  
50  
51  
52  
53  
54  
55  
56  
57  
58  
59  
60

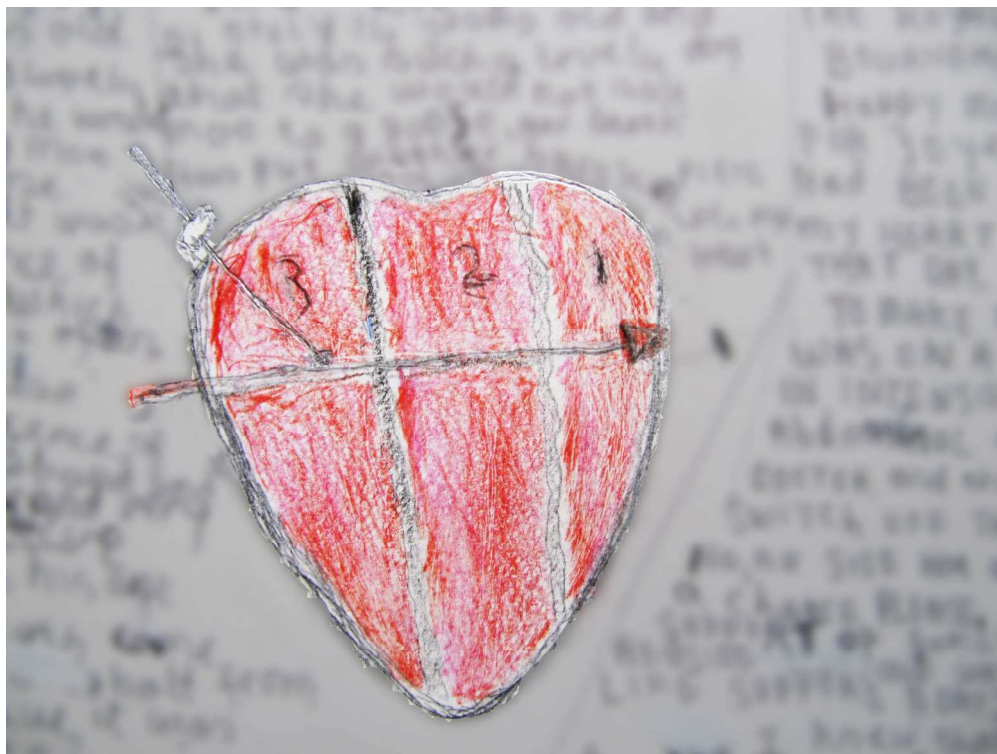

Drawing by FB

1411x1058mm (72 x 72 DPI)

For peer review only



1  
2  
3 **Supplementary Web tables**

4  
5 **Table S1: Descriptives for Sense of Belonging**

6  
7

| Sense of Belonging statement                                                         | Median (IQR) range  |                     |                      |
|--------------------------------------------------------------------------------------|---------------------|---------------------|----------------------|
| <i>(potential score range 1-7, higher scores indicate higher sense of belonging)</i> | Session 1<br>(n=24) | Session 5<br>(n=20) | Session 10<br>(n=21) |
| 1. I see myself as a member of the HoS group                                         | 6 (2) 1-7           | 7 (1) 4-7           | 7 (0) 6-7            |
| 2. I am pleased to be a member of the HoS group                                      | 7 (2) 1-7           | 7 (1) 4-7           | 7 (0) 4-7            |
| 3. I feel strong ties with members of the HoS group                                  | 4 (5) 1-7           | 5 (3) 4-7           | 6 (2) 3-7            |
| 4. I identify with other members of the HoS group                                    | 5 (3) 1-7           | 6 (2) 4-7           | 7 (1) 4-7            |

8  
9  
10  
11  
12  
13  
14  
15  
16  
17  
18  
19  
20  
21  
22  
23  
24  
25  
26  
27  
28  
29  
30  
31  
32  
33  
34  
35  
36  
37  
38  
39  
40  
41  
42  
43  
44  
45  
46  
47  
48  
49  
50  
51  
52  
53  
54  
55  
56  
57  
58  
59  
60

**Table S2: Descriptives for potential secondary outcomes**

| Outcome measure                                                                     | Baseline<br>N=56 | Post<br>N=47     |
|-------------------------------------------------------------------------------------|------------------|------------------|
| <b>Rosenberg Self-Esteem Scale (RSES)</b>                                           |                  |                  |
| <i>(potential score range 0-30 , higher scores indicate higher self-esteem)</i>     |                  |                  |
| UC mean (SD) N                                                                      | 20.8 (6.23) 27   | 20.1 (5.21) 22   |
| HoS mean (SD) N                                                                     | 20.4 (5.81) 29   | 21.1 (5.67) 25   |
| <b>Medical Outcomes Short Form-36 (SF-36) - Physical functioning subscale</b>       |                  |                  |
| <i>(potential range 0-100, higher scores more favourable health)</i>                |                  |                  |
| UC mean (SD) N                                                                      | 43.4 (24.51) 27  | 42.7 (23.94) 22  |
| HoS mean (SD) N                                                                     | 48.3 (25.16) 27  | 55.3 (23.23) 23  |
| <b>SF-36 Role limitations - Physical subscale</b>                                   |                  |                  |
| <i>(potential range 0-100, higher scores more favourable health)</i>                |                  |                  |
| UC mean, SD (95% CI)                                                                | 23.9 (29.36) 27  | 17.0 (26.03) 22  |
| HoS mean (SD) N                                                                     | 35.0 (34.61) 28  | 27.0 (38.13) 25  |
| <b>SF-36 Role limitations - Emotional</b>                                           |                  |                  |
| <i>(potential range 0-100, higher scores more favourable health state)</i>          |                  |                  |
| UC mean (SD) N                                                                      | 42.4 (45.05) 27  | 50.0 (42.10) 22  |
| HoS mean (SD) N                                                                     | 45.3 (41.81) 28  | 49.3 (45.26) 25  |
| <b>SF-36 Energy/Fatigue subscale</b>                                                |                  |                  |
| <i>(potential range 0-100, higher scores more favourable health)</i>                |                  |                  |
| UC mean (SD) N                                                                      | 48.6 (18.01) 27  | 42.05 (20.45) 22 |
| HoS mean (SD) N                                                                     | 45.2 (25.5) 27   | 43.3 (25.40) 24  |
| <b>SF-36 Emotional wellbeing subscale</b>                                           |                  |                  |
| <i>(potential range 0-100, higher scores more favourable health)</i>                |                  |                  |
| UC mean SD (N)                                                                      | 68.91 (17.19) 27 | 69.81 (19.51) 22 |
| HoS mean SD (N)                                                                     | 67.33 (17.16) 27 | 68.83 (20.43) 24 |
| <b>SF-36 Social functioning subscale</b>                                            |                  |                  |
| <i>(potential range 0-100, higher scores more favourable health)</i>                |                  |                  |
| UC mean (SD) N                                                                      | 69.3 (26.65) 27  | 64.2 (29.70) 22  |
| HoS mean (SD) N                                                                     | 66.5 (26.45) 28  | 72.00 (28.25) 25 |
| <b>SF-36 Pain subscale</b>                                                          |                  |                  |
| <i>(potential range 0-100, higher scores more favourable health)</i>                |                  |                  |
| UC mean (SD) N                                                                      | 66.8 (24.45) 27  | 71.2 (28.32) 22  |
| HoS mean (SD) N                                                                     | 61.9 (24.97) 27  | 69.5 (27.63) 25  |
| <b>SF-36 General Health subscale</b>                                                |                  |                  |
| <i>(potential range 0-100, higher scores more favourable health)</i>                |                  |                  |
| UC mean SD N                                                                        | 55.2 (23.68) 27  | 55.5 (21.49) 22  |
| HoS mean (SD) N                                                                     | 51.4 (20.09) 27  | 57.3 (19.67) 24  |
| <b>SF-6D Derived health state value</b>                                             |                  |                  |
| <i>(potential range -0.296 to 1.00 with higher scores indicating better health)</i> |                  |                  |
| UC mean (SD) N                                                                      | 0.63 (0.09) 27   | 0.64 (0.08) 21   |
| HoS mean, SD N                                                                      | 0.64 (0.12) 26   | 0.68 (0.12) 24   |

UC = Usual Care

HoS = HeART of Stroke

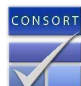

## CONSORT 2010 checklist of information to include when reporting a pilot or feasibility trial\*

| Section/Topic                    | Item No | Checklist item                                                                                                                                                                              | Reported on page No |
|----------------------------------|---------|---------------------------------------------------------------------------------------------------------------------------------------------------------------------------------------------|---------------------|
| <b>Title and abstract</b>        |         |                                                                                                                                                                                             |                     |
|                                  | 1a      | Identification as a pilot or feasibility randomised trial in the title                                                                                                                      | 2                   |
|                                  | 1b      | Structured summary of pilot trial design, methods, results, and conclusions (for specific guidance see CONSORT abstract extension for pilot trials)                                         | 4-5                 |
| <b>Introduction</b>              |         |                                                                                                                                                                                             |                     |
| Background and objectives        | 2a      | Scientific background and explanation of rationale for future definitive trial, and reasons for randomised pilot trial                                                                      | 6-7                 |
|                                  | 2b      | Specific objectives or research questions for pilot trial                                                                                                                                   | 8                   |
| <b>Methods</b>                   |         |                                                                                                                                                                                             |                     |
| Trial design                     | 3a      | Description of pilot trial design (such as parallel, factorial) including allocation ratio                                                                                                  | 8                   |
|                                  | 3b      | Important changes to methods after pilot trial commencement (such as eligibility criteria), with reasons                                                                                    | 10, 20              |
| Participants                     | 4a      | Eligibility criteria for participants                                                                                                                                                       | 10                  |
|                                  | 4b      | Settings and locations where the data were collected                                                                                                                                        | 10, 13              |
|                                  | 4c      | How participants were identified and consented                                                                                                                                              | 10-11               |
| Interventions                    | 5       | The interventions for each group with sufficient details to allow replication, including how and when they were actually administered                                                       | 12-14               |
| Outcomes                         | 6a      | Completely defined prespecified assessments or measurements to address each pilot trial objective specified in 2b, including how and when they were assessed                                | 14-17               |
|                                  | 6b      | Any changes to pilot trial assessments or measurements after the pilot trial commenced, with reasons                                                                                        | 10, 20              |
|                                  | 6c      | If applicable, prespecified criteria used to judge whether, or how, to proceed with future definitive trial                                                                                 | -                   |
| Sample size                      | 7a      | Rationale for numbers in the pilot trial                                                                                                                                                    | 9                   |
|                                  | 7b      | When applicable, explanation of any interim analyses and stopping guidelines                                                                                                                | -                   |
| Randomisation:                   |         |                                                                                                                                                                                             |                     |
| Sequence generation              | 8a      | Method used to generate the random allocation sequence                                                                                                                                      | 11                  |
|                                  | 8b      | Type of randomisation(s); details of any restriction (such as blocking and block size)                                                                                                      | 11                  |
| Allocation concealment mechanism | 9       | Mechanism used to implement the random allocation sequence (such as sequentially numbered containers), describing any steps taken to conceal the sequence until interventions were assigned | 11                  |
| Implementation                   | 10      | Who generated the random allocation sequence, who enrolled participants, and who assigned participants to                                                                                   | 11                  |

|                                                      |     |                                                                                                                                                                                       |               |
|------------------------------------------------------|-----|---------------------------------------------------------------------------------------------------------------------------------------------------------------------------------------|---------------|
|                                                      |     | interventions                                                                                                                                                                         |               |
| Blinding                                             | 11a | If done, who was blinded after assignment to interventions (for example, participants, care providers, those assessing outcomes) and how                                              | 11,14,23      |
|                                                      | 11b | If relevant, description of the similarity of interventions                                                                                                                           | -             |
| Statistical methods                                  | 12  | Methods used to address each pilot trial objective whether qualitative or quantitative                                                                                                | 17-18         |
| <b>Results</b>                                       |     |                                                                                                                                                                                       |               |
| Participant flow (a diagram is strongly recommended) | 13a | For each group, the numbers of participants who were approached and/or assessed for eligibility, randomly assigned, received intended treatment, and were assessed for each objective | 19 + Figure 1 |
|                                                      | 13b | For each group, losses and exclusions after randomisation, together with reasons                                                                                                      | Figure 1      |
| Recruitment                                          | 14a | Dates defining the periods of recruitment and follow-up                                                                                                                               | 19            |
|                                                      | 14b | Why the pilot trial ended or was stopped                                                                                                                                              | -             |
| Baseline data                                        | 15  | A table showing baseline demographic and clinical characteristics for each group                                                                                                      | 32            |
| Numbers analysed                                     | 16  | For each objective, number of participants (denominator) included in each analysis. If relevant, these numbers should be by randomised group                                          | 34            |
| Outcomes and estimation                              | 17  | For each objective, results including expressions of uncertainty (such as 95% confidence interval) for any estimates. If relevant, these results should be by randomised group        | 34            |
| Ancillary analyses                                   | 18  | Results of any other analyses performed that could be used to inform the future definitive trial                                                                                      | 35-39         |
| Harms                                                | 19  | All important harms or unintended effects in each group (for specific guidance see CONSORT for harms)                                                                                 | 23            |
|                                                      | 19a | If relevant, other important unintended consequences                                                                                                                                  | -             |
| <b>Discussion</b>                                    |     |                                                                                                                                                                                       |               |
| Limitations                                          | 20  | Pilot trial limitations, addressing sources of potential bias and remaining uncertainty about feasibility                                                                             | 25-28         |
| Generalisability                                     | 21  | Generalisability (applicability) of pilot trial methods and findings to future definitive trial and other studies                                                                     | 25-28         |
| Interpretation                                       | 22  | Interpretation consistent with pilot trial objectives and findings, balancing potential benefits and harms, and considering other relevant evidence                                   | 25-28         |
|                                                      | 22a | Implications for progression from pilot to future definitive trial, including any proposed amendments                                                                                 | 25-28         |
| <b>Other information</b>                             |     |                                                                                                                                                                                       |               |
| Registration                                         | 23  | Registration number for pilot trial and name of trial registry                                                                                                                        | 5             |
| Protocol                                             | 24  | Where the pilot trial protocol can be accessed, if available                                                                                                                          | Referenced    |
| Funding                                              | 25  | Sources of funding and other support (such as supply of drugs), role of funders                                                                                                       | 29            |
|                                                      | 26  | Ethical approval or approval by research review committee, confirmed with reference number                                                                                            |               |

Citation: Eldridge SM, Chan CL, Campbell MJ, Bond CM, Hopewell S, Thabane L, et al. CONSORT 2010 statement: extension to randomised pilot and feasibility trials. *BMJ*. 2016;355.\*

# BMJ Open

## HeART of Stroke: Randomised controlled parallel arm feasibility study of a community-based Arts & Health intervention plus usual care compared with usual care to increase psychological wellbeing in people following a stroke.

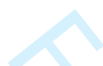

|                                 |                                                                                                                                                                                                                                                                                                                                                                                                                                                                                                                                                                                                                                                                                                                                                                                                                                                                                                                                                                                                                                                                                                                                                                                       |
|---------------------------------|---------------------------------------------------------------------------------------------------------------------------------------------------------------------------------------------------------------------------------------------------------------------------------------------------------------------------------------------------------------------------------------------------------------------------------------------------------------------------------------------------------------------------------------------------------------------------------------------------------------------------------------------------------------------------------------------------------------------------------------------------------------------------------------------------------------------------------------------------------------------------------------------------------------------------------------------------------------------------------------------------------------------------------------------------------------------------------------------------------------------------------------------------------------------------------------|
| Journal:                        | <i>BMJ Open</i>                                                                                                                                                                                                                                                                                                                                                                                                                                                                                                                                                                                                                                                                                                                                                                                                                                                                                                                                                                                                                                                                                                                                                                       |
| Manuscript ID                   | bmjopen-2017-021098.R1                                                                                                                                                                                                                                                                                                                                                                                                                                                                                                                                                                                                                                                                                                                                                                                                                                                                                                                                                                                                                                                                                                                                                                |
| Article Type:                   | Research                                                                                                                                                                                                                                                                                                                                                                                                                                                                                                                                                                                                                                                                                                                                                                                                                                                                                                                                                                                                                                                                                                                                                                              |
| Date Submitted by the Author:   | 09-Apr-2018                                                                                                                                                                                                                                                                                                                                                                                                                                                                                                                                                                                                                                                                                                                                                                                                                                                                                                                                                                                                                                                                                                                                                                           |
| Complete List of Authors:       | <p>Ellis-Hill, Caroline; Bournemouth University,<br/> Thomas, Sarah; Bournemouth University, Faculty of Health &amp; Social Sciences<br/> Gracey, Fergus; University of East Anglia, Department of Clinical Psychology<br/> Lamont-Robinson, Catherine; University of Bristol, School of Social and Community Medicine<br/> Cant, Robin; Service User, formerly of Canterbury Christ Church University<br/> Marques, Elsa; University of Bristol, School of Social and Community Medicine<br/> Thomas, Peter; Bournemouth University, Faculty of Health and Social Sciences<br/> Grant, Mary; University of Warwick<br/> Nunn, Samantha; Cambridgeshire Community Services NHS Trust, Oliver Zangwill Centre<br/> Paling, Thomas; University of Bristol School of Social and Community Medicine<br/> Thomas, Charlotte; Bournemouth University, School of Health and Social Sciences<br/> Werson, Alessa; University of East Anglia, Department of Clinical Psychology<br/> Galvin, Kathleen; School of Health Sciences<br/> Reynolds, Frances; Brunel University London, College of Health and Life Sciences<br/> Jenkinson, Damian; Dorset County Hospital NHS Foundation Trust</p> |
| <b>Primary Subject Heading</b>: | Health services research                                                                                                                                                                                                                                                                                                                                                                                                                                                                                                                                                                                                                                                                                                                                                                                                                                                                                                                                                                                                                                                                                                                                                              |
| Secondary Subject Heading:      | Neurology                                                                                                                                                                                                                                                                                                                                                                                                                                                                                                                                                                                                                                                                                                                                                                                                                                                                                                                                                                                                                                                                                                                                                                             |
| Keywords:                       | Stroke < NEUROLOGY, Arts & Health, Identity, Wellbeing, Feasibility Study                                                                                                                                                                                                                                                                                                                                                                                                                                                                                                                                                                                                                                                                                                                                                                                                                                                                                                                                                                                                                                                                                                             |
|                                 |                                                                                                                                                                                                                                                                                                                                                                                                                                                                                                                                                                                                                                                                                                                                                                                                                                                                                                                                                                                                                                                                                                                                                                                       |

1  
2  
3  
4  
5  
6  
7  
8  
9  
10  
11  
12  
13  
14  
15  
16  
17  
18  
19  
20  
21  
22  
23  
24  
25  
26  
27  
28  
29  
30  
31  
32  
33  
34  
35  
36  
37  
38  
39  
40  
41  
42  
43  
44  
45  
46  
47  
48  
49  
50  
51  
52  
53  
54  
55  
56  
57  
58  
59  
60

SCHOLARONE™  
Manuscripts

For peer review only

1  
2  
3 **Title:** HeART of Stroke: Randomised controlled parallel arm feasibility study of a community-  
4 based Arts & Health intervention plus usual care compared with usual care to increase  
5 psychological wellbeing in people following a stroke.  
6  
7

8  
9  
10 **Corresponding author:**

11 Caroline Ellis-Hill,\* Faculty of Health and Social Sciences; Bournemouth University,  
12 Bournemouth, UK  
13  
14  
15 cehill@bournemouth.ac.uk  
16  
17

18  
19 **Co-authors:**

20 Sarah Thomas,\* Faculty of Health and Social Sciences, Bournemouth University,  
21 Bournemouth, UK  
22

23  
24 Fergus Gracey, Department of Clinical Psychology, University of East Anglia, Norwich, UK  
25

26 Catherine Lamont-Robinson, School of Social and Community Medicine, University of  
27 Bristol, Bristol, UK  
28

29 Robin Cant, Servicer User, (formerly of Canterbury Christ Church University), Canterbury,  
30 UK  
31

32  
33 Elsa Marques, School of Clinical Sciences, University of Bristol, Bristol, UK  
34

35 Peter Thomas, Faculty of Health and Social Sciences, Bournemouth University,  
36 Bournemouth, UK  
37

38  
39 Mary Grant, Warwick Clinical Trials Unit, University of Warwick, Coventry, UK  
40

41 Samantha Nunn, Cambridgeshire Community Services NHS Trust, Oliver Zangwill Centre,  
42 Ely, UK  
43

44 Thomas Paling, School of Clinical Sciences, University of Bristol, Bristol, UK  
45

46 Charlotte Thomas, Faculty of Health and Social Sciences, Bournemouth University,  
47 Bournemouth, UK  
48

49  
50 Alessa Werson Department of Clinical Psychology, University of East Anglia, Norwich, UK  
51

52 Kathleen Galvin, School of Health Sciences, University of Brighton, Brighton, UK  
53

54 Frances Reynolds, formerly College of Health and Life Sciences, Brunel University London,  
55 Uxbridge, UK  
56  
57

1  
2  
3  
4  
5  
6  
7  
8  
9  
10  
11  
12  
13  
14  
15  
16  
17  
18  
19  
20  
21  
22  
23  
24  
25  
26  
27  
28  
29  
30  
31  
32  
33  
34  
35  
36  
37  
38  
39  
40  
41  
42  
43  
44  
45  
46  
47  
48  
49  
50  
51  
52  
53  
54  
55  
56  
57  
58  
59  
60

Damian Jenkinson, Stroke Unit, Dorset County Hospital, Dorchester UK

\*Joint first authors

**Keywords: stroke, Arts & Health, identity, wellbeing, feasibility study**

**Word count: ~ 7500**



## ABSTRACT

**Introduction** People often experience distress following stroke due to fundamental challenges to their identity.

**Objectives** Evaluate: (i) the acceptability of 'HeART of Stroke' (HoS), a community-based Arts & Health group intervention to increase psychological wellbeing; (ii) the feasibility of a definitive randomised controlled trial (RCT).

**Design** Two-centre 24-month parallel arm RCT with qualitative and economic components. Randomisation stratified by centre and stroke severity. Participant blinding was not possible. Outcome assessment blinding attempted.

**Setting** Community

**Participants** Community-dwelling adults  $\leq$  2 years post-stroke, recruited via hospital clinical teams/databases or community stroke/rehabilitation teams.

**Interventions** Artist-facilitated Arts & Health group intervention (HoS) (ten 2-hour sessions over 14 weeks) plus usual care (UC) versus UC.

**Outcomes** Self-reported measures of wellbeing, mood, capability, health-related quality of life, self-esteem and self-concept (baseline and five months post-randomisation). Key feasibility parameters were gathered, data collection methods piloted and participant interviews (n=24) explored acceptability of the intervention/study processes.

**Results** Despite a low recruitment rate (14%; 95% CI: 11% to 18%), 88% of the recruitment target was met with 29 participants randomised to HoS and 27 to UC (57% male; mean [SD] age = 70 [12.1] years; time-since-stroke = 9 [6.1] months). Follow-up data were available for 47/56 (84%; 95% CI: 72% to 91%). Completion rates for a study-specific resource use questionnaire were 79% and 68% (NHS and societal perspectives). Five people declined HoS post-randomisation; of the remaining 24 who attended, 83% attended  $\geq$ 6 sessions.

1  
2  
3 Preliminary effect sizes for candidate primary outcomes were in the direction of benefit for  
4 the HoS arm. Participants found study processes acceptable. The intervention cost an  
5 estimated £456 per person and was well-received (no intervention-related serious adverse  
6 events reported).  
7  
8  
9

10  
11 **Conclusions** Findings from this first community-based study of an Arts & Health intervention  
12 for people post-stroke suggest a definitive RCT is feasible. Recruitment methods will be  
13 revised.  
14  
15

16  
17  
18 ISRCTN 99728983  
19  
20

### 21 ***Strengths and limitations of this study***

- 22 • This is the first feasibility study of a community-based Arts & Health group  
23 intervention to support wellbeing following a stroke.
- 24 • Participants were recruited via both hospital and community clinical teams enabling  
25 recruitment rate estimates for two different recruitment approaches.
- 26 • The study incorporated mixed methods and a feasibility economic component.
- 27 • The study only included short term follow-up.
- 28 • Findings will inform a definitive randomised controlled trial of effectiveness and cost-  
29 effectiveness.  
30  
31  
32  
33  
34  
35  
36  
37  
38  
39  
40  
41  
42  
43  
44  
45  
46  
47  
48  
49  
50  
51  
52  
53  
54  
55  
56  
57  
58  
59  
60

## INTRODUCTION

Each year over 150,000 people in the UK experience a stroke<sup>1</sup> with one-third left with residual disabilities including paralysis on one side and cognitive and communication impairments.<sup>2</sup> Qualitative meta-syntheses have highlighted that following a stroke, or other types of brain injury, people face fundamental emotional and existential challenges. They experience challenges to their sense of self and identity and their current and future lives are filled with uncertainty.<sup>3,4</sup> Emotional health and wellbeing following stroke have been highlighted as national priorities, featuring in the James Lind Alliance 'top ten' research priorities.<sup>5</sup>

Following a stroke people report a need to 'get their lives back'. Failure to do so is associated with depression<sup>6,7</sup> (with reported accumulative incidence of 39–52% within 5 years of stroke<sup>7</sup>), loss of confidence,<sup>8</sup> people having difficulty in 'feeling part of things',<sup>9</sup> loss of sense of self<sup>10</sup> and becoming socially isolated.<sup>11</sup> This creates long-term costs, not only for the stroke survivor, but also for their family members,<sup>12,13</sup> and for government, health and social services through reduced family employment and increased social and primary care needs.<sup>14</sup> Where untreated, depression is associated with poorer functional outcomes<sup>15</sup> and higher mortality.<sup>16,17</sup>

While there have been great improvements in stroke care, the stroke pathway for long-term support is still under-researched and under-developed. A Cochrane review indicated no evidence for pharmacotherapy in the prevention of post-stroke depression, and only weak evidence for psychotherapeutic approaches.<sup>18</sup> A more recent systematic review<sup>19</sup> that limited inclusion to participants without a diagnosis of depression at baseline concluded that antidepressants may reduce the likelihood of depression developing post-stroke but that the optimum timing and duration of treatment was not clear. There is also evidence to suggest that pharmacological treatments can have modest benefits in the treatment of depression

1  
2  
3 post-stroke.<sup>20-23</sup> However, anti-depressants have side effects and may have undesirable  
4 interactions with other medications and comorbidities.<sup>20-23</sup>  
5  
6  
7

8  
9 While the evidence for the effectiveness of psychotherapeutic interventions for post-stroke  
10 depression is inconclusive,<sup>20</sup> two recent RCTs (motivational interviewing<sup>24,25</sup> and a brief  
11 psychosocial behavioural intervention plus anti-depressant<sup>26</sup>) demonstrated reductions in  
12 post-stroke depression. However, these trials involved people early after stroke and  
13 excluded those with severe communication or cognitive problems. The CALM trial<sup>27</sup> of  
14 behavioural therapy demonstrated improved mood in stroke patients with aphasia and a  
15 feasibility study of behavioural activation is now underway using a broader sample of people  
16 with depression 3-60 months post-stroke.<sup>28</sup> A study of cognitive behavioural therapy for  
17 post-stroke depression demonstrated no benefits over usual care or an attention control;  
18 however, the sample size was small.<sup>29</sup>  
19  
20  
21  
22  
23  
24  
25  
26  
27  
28  
29  
30

31 Around 20% of people experience clinical levels of anxiety following stroke.<sup>30</sup> A recent  
32 Cochrane review highlighted the need for further rigorously conducted RCTs to assess  
33 pharmacological and psychological treatments for anxiety following stroke.<sup>30</sup>  
34  
35  
36  
37  
38

39 A stepped approach to psychological support following stroke has been proposed in the UK  
40  
41 <sup>31</sup> (Step 1: awareness, watching; Step 2: low intensity services, such as guided self-help;  
42 Step 3: high intensity services, such as cognitive behavioural therapy (CBT)) but this system  
43 is still in its infancy.  
44  
45  
46  
47  
48

49 Harrison et al. (2017)<sup>32</sup> concluded from qualitative research with service users that research  
50 is needed to test alternative options to formal psychological support. Ellis-Hill et al.<sup>33</sup> and  
51 Gracey et al.<sup>34</sup> have independently developed complementary theoretical models based on  
52 empirical evidence to understand the processes involved in re-establishing a positive sense  
53  
54  
55  
56  
57  
58  
59  
60

1  
2  
3 of self and confidence in life following a stroke. The current research draws upon two  
4 specific and related theoretical frameworks; namely, the Life Thread Model<sup>33</sup> and Self-  
5 discrepancy theory.<sup>9,34</sup> These highlight that following an acquired brain injury people often  
6 lose a sense of coherence of self and a sense of predictability in life. These existential  
7 losses can cause considerable anxiety and can lead to depression. Within  
8 neuropsychological rehabilitation, it is hypothesised that establishing a safe place where  
9 clients feel understood and supported can facilitate self-development.<sup>34,35</sup> When carrying out  
10 embodied creative activities (such as art), people can reconnect their past, present and  
11 future selves, recreating meaningful narratives in their lives, and new ways of 'being in the  
12 world',<sup>36,37</sup> leading to improvements in mood and self-confidence.

23  
24 There is growing recognition of the importance of creative approaches in health provision;  
25 for example, in the UK we have seen the launch of a national Special Interest Group for Arts,  
26 Health and Wellbeing supported by the Royal Society for Public Health<sup>38</sup> and the All-Party  
27 Parliamentary Group (APPG) inquiry into Arts, Health and Well-being in the UK.<sup>39</sup> Practical  
28 creative approaches offer new ways to explore experiences, especially those which are  
29 difficult to put into words.<sup>40</sup> There is a growing body of evidence that art-based practices are  
30 of great benefit in supporting psychological and social recovery in health services<sup>39</sup> and an  
31 emerging international agenda for 'Arts for Health' initiatives.<sup>41</sup> An ongoing prospective  
32 observational study (2009-2016) of patients referred to an 8 or 10 week 'arts on referral'  
33 programme in UK general practice (n = 1297) found statistically significant improvements in  
34 wellbeing in those who completed their prescribed programme.<sup>42</sup> Boyce et al.'s (2017)<sup>43</sup>  
35 critical review of the value of arts in healthcare highlighted that although findings are  
36 promising, research to date has been relatively narrow both in scope (a focus on music) and  
37 methodological approach. They called for methodologically rigorous research that considers  
38 different art forms in a variety of healthcare settings and considers cost-effectiveness.

1  
2  
3 In stroke, initial findings from exploratory studies of the effect of art on mood have been  
4 promising.<sup>44,45</sup> To our knowledge, there are only two other RCTs of Arts and Health  
5 interventions in stroke, both of which took place in inpatient rehabilitation settings.<sup>46,47</sup>  
6  
7 Konkasuwan's 2015 study in Thailand involved 118 stroke patients and compared 'creative  
8 art therapy' plus standard physiotherapy with physiotherapy only. The creative art therapy  
9 was delivered by art therapists twice a week over 4 weeks and included music, singing and  
10 meditation in addition to the creative art therapy activities. They found improvements  
11 favouring the intervention group post-treatment in measures of mood, cognition, physical  
12 functioning and quality of life. Morris et al.'s<sup>47</sup> United Kingdom randomised controlled  
13 feasibility study (n=81) compared an artist-delivered visual arts participation programme (up  
14 to 8 sessions including individual and group delivery formats) with usual care. They  
15 concluded that the intervention was feasible to deliver and appeared to offer promise in the  
16 domains of emotional wellbeing and self-efficacy.  
17  
18  
19  
20  
21  
22  
23  
24  
25  
26  
27  
28  
29

30  
31 White et al. (2016)<sup>48</sup> highlighted that community participation and stroke-related disability are  
32 potentially modifiable risk factors affecting post-stroke health-related quality of life and that  
33 interventions addressing these factors should be developed and tested. This feasibility  
34 study<sup>49</sup> is the first to begin to systematically test an Arts & Health intervention ('HeART of  
35 Stroke') for people post-stroke in a community setting.  
36  
37  
38  
39  
40  
41  
42

## 43 **METHODS**

### 44 **Ethical approvals**

45  
46 The study was reviewed and given a favourable opinion by the Exeter NHS REC (Ref:  
47 13/SW/0136). Local Research and Development approval was granted by the Royal  
48 Bournemouth and Christchurch Hospitals (RBCH) NHS Foundation Trust (the study  
49 sponsor) and by Cambridgeshire Community Services NHS Trust.  
50  
51  
52  
53  
54  
55  
56  
57  
58  
59  
60

## Aims and objectives

The aims of the feasibility study were, firstly, to assess the acceptability of a 10-session community Arts & Health group intervention ('HeART of Stroke') for people following stroke and, secondly, to evaluate the feasibility of conducting a definitive randomised controlled trial to test its effectiveness and cost effectiveness when added to usual care. The specific objectives were to:

1. Assess the acceptability of key aspects of study design, randomisation and recruitment processes, and of the HoS group intervention.
2. Estimate recruitment and short-term retention rates.
3. Estimate HoS group attendance rates.
4. Assess the suitability of the outcome measures and feasibility of the assessment strategy.
5. Refine the selection of the outcome measures; in particular, to help inform the selection of the primary outcome for the full scale RCT.
6. Explore, qualitatively, individuals' experiences of participating in the study and gather feedback about the intervention and outcome measures.
7. Collect data on the standard deviation of outcome measures to inform a sample size calculation for a larger trial and obtain a preliminary estimate of effect size.
8. Refine the HoS group intervention and its delivery.
9. Explore differences in processes between the two study centres.
10. Identify, measure and value resources required to deliver the intervention in the community.
11. Develop and pilot data collection tools to measure resource use in the follow-up period to inform the design of a future within-trial economic evaluation, and estimate the cost of delivering HoS.

## Study design

1  
2  
3 A two centre parallel arm randomised controlled feasibility study comparing the HoS group  
4 intervention plus usual care versus usual care alone (1:1 allocation ratio), with nested  
5 economic and qualitative components.  
6  
7  
8  
9

10 For reasons of efficiency and expediency, the end point of this feasibility study was one  
11 month post-intervention, but a definitive trial would include up to 12 months follow-up post-  
12 intervention to capture the longer term health and economic impact of the HoS intervention.  
13  
14  
15  
16  
17

### 18 **Patient and public involvement**

19 Patient and public involvement members were involved in the initiation and design of the  
20 study, the development of the funding application, the design of the HoS intervention, the  
21 selection of relevant outcome measures and the design of study materials. During the  
22 research, as well as having RC, a grant holder, who attended all steering group and  
23 dissemination meetings, we formed PPI groups in each centre. There were five patient and  
24 public involvement members in Bournemouth (four involved in the study at any one time).  
25 Members came from the local voluntary 'Different Strokes' group, the Royal Bournemouth  
26 and Christchurch Hospitals NHS Foundation Trust stroke ward patient and public  
27 involvement group and via word of mouth from these members. Four members were several  
28 years following their stroke and one person was a caregiver. There were three patient and  
29 public involvement members in Cambridgeshire; one was identified through a previous  
30 research role, two were identified through community organisations (Stroke Association and  
31 NHS community services). All were several years post-stroke.  
32  
33  
34  
35  
36  
37  
38  
39  
40  
41  
42  
43  
44  
45  
46  
47  
48

49 As planned, patient and public involvement members were involved in three of the five study  
50 management group meetings. A newsletter kept patient and public involvement members  
51 updated with study progress. Members contributed to the study in many ways, including  
52 providing feedback about outcome measures, providing opportunities for the researchers to  
53  
54  
55  
56  
57  
58  
59  
60



1  
2  
3 run through/practise aspects of the study protocol, helping to identify a suitable venue for the  
4 intervention, providing ideas on how to enhance recruitment, contributing to plain English  
5 summaries, supporting the exhibition of artwork and other dissemination activities.  
6

7  
8 Examples of dissemination activities undertaken include a workshop at the UK Stroke Forum  
9 co-delivered by a study participant with two members of the research team (CLR and CEH),  
10 local newspaper coverage and articles in magazines.  
11  
12  
13  
14  
15

## 16 **Methods**

17  
18 Details of our methods are published in our protocol paper.<sup>49</sup> We aimed to recruit a sample  
19 of 64 people (32 per centre in two blocks of 16). This would have provided an estimate of the  
20 recruitment rate with a precision of  $\pm 6\%$  (assuming a recruitment rate of 30%) and a  
21 questionnaire return rate with a precision of  $\pm 10\%$  (assuming a questionnaire return rate of  
22 80%). Reporting of this feasibility study follows the CONSORT 2010 extension for  
23 randomised pilot and feasibility trials.<sup>50</sup>  
24  
25  
26  
27  
28  
29  
30  
31

## 32 **Participants**

33  
34 Participants were adults living in the community up to two years post-stroke. This time point  
35 was chosen as the peak incidence and greatest severity of depression commonly occurs  
36 between 6 months and 2 years following stroke.<sup>51</sup> Participants also had physical or cognitive  
37 symptoms from stroke at five days post-stroke. Severity of stroke and cognitive impairment  
38 are risk factors for the development of post-stroke depression<sup>52</sup> and it was felt people who  
39 had fully recovered physically and cognitively within this short time point may be less likely to  
40 benefit from the intervention. Exclusion criteria included severe receptive aphasia, cognitive  
41 levels that would preclude completion of outcome measures even with support, currently  
42 receiving a psychiatric or clinical psychology intervention, living in a residential or nursing  
43 home, requiring assistance with toilet needs (because the Arts & Health practitioners were  
44 not trained to support transfers).  
45  
46  
47  
48  
49  
50  
51  
52  
53  
54  
55  
56  
57  
58  
59  
60

## Identification, screening and recruitment

### ***Bournemouth Centre, UK (Royal Bournemouth and Christchurch Hospitals (RBCH) NHS Foundation Trust)***

Potential participants, identified by clinical research network staff at RBCH NHS Foundation Trust, were either sent or given an invitation letter, 'Key Facts' page and reply slip and asked to return a prepaid reply slip if they were interested in participating. The study research assistant contacted those who expressed an interest and answered any queries or questions (via telephone, or face-to-face if the person had a communication disability). If they were still interested in taking part, they were sent or given a set of participant information sheets.

In an attempt to improve recruitment we revised the invitation and reminder letters partway through the study via an approved substantial amendment to the NHS REC. Our patient and public involvement partners and clinical colleagues in the stroke research team at RBCH provided feedback to enhance the appeal and readability of the information via a more accessible and engaging style.

### ***Cambridgeshire Centre, UK (Cambridgeshire Community Services NHS Trust)***

Clinical staff from the community stroke and neuro-rehabilitation teams identified potential participants in the community. In addition to the invitation letter described above, a 'consent to contact' approach was used whereby consent to be contacted by the Cambridgeshire centre research assistant was sought. A member of the clinical team obtained this consent during a face-to-face consultation or verbally over the phone. If the individual remained interested, the research assistant gave/sent them a set of participant information sheets.

## Informed consent process

For individuals interested in taking part, the local research assistant arranged to visit the person at home within one month prior to the start of the HoS group. This provided an

1  
2  
3 opportunity to answer any remaining questions the individual had about the study. If the  
4 person still fulfilled the eligibility criteria (a screening checklist was used) and still wished to  
5 take part, they were asked to complete and sign a consent form and complete the baseline  
6 assessment.  
7  
8  
9

### 10 11 12 **Randomisation**

13  
14 The web-based randomisation system was created by the Peninsula Clinical Trials Unit in  
15 conjunction with the study statistician. Participants were allocated to the HoS intervention  
16 plus usual care or usual care in a 1:1 ratio using minimisation to balance the numbers  
17 allocated to each arm with stratification by recruitment centre and stroke severity (Rivermead  
18 Motor Assessment – Gross Motor Subscale score  $\leq 6$  ('mild') vs.  $\geq 7$  ('moderate/severe')).<sup>53</sup>  
19  
20 The study research assistants in each centre logged onto the system using a unique  
21 username and password. They were able to randomise participants individually or in  
22 batches. Randomisation of individuals was used to 'top up' the two trial arms if any further  
23 participants were recruited before the HoS intervention groups started.  
24  
25  
26  
27  
28  
29  
30  
31  
32  
33

### 34 **Blinding**

35  
36 The nature of the intervention meant that it was not possible to blind participants and artist  
37 facilitators to group allocation. At follow-up, when support was provided/required to complete  
38 outcomes this was provided by assessors blind to group allocation.  
39  
40  
41  
42  
43

### 44 **HeART of Stroke (HoS) group intervention**

45  
46 The HoS intervention is described in detail in the published protocol.<sup>49</sup> In summary, it  
47 comprised ten two hour Arts & Health practitioner-led group sessions held in community  
48 venues over 14 weeks. Sessions were held in the mornings (10.30-12.30) with a  
49 refreshment break. Sessions 1-3 included introductions and initial exploration. During  
50 sessions 4-7 participants were encouraged to develop their own creative practice within the  
51  
52  
53  
54  
55  
56  
57  
58  
59  
60

1  
2  
3 sessions and at home. In sessions 8-10 links with local Arts & Health practitioners were  
4 made and potential plans for an exhibition of the participants' work discussed.  
5  
6  
7

8  
9 Key aspects of the group were the opportunity to be creative and the safe group  
10 atmosphere. At each group, the Arts & Health practitioners encouraged members to a)  
11 explore the materials provided and arts techniques shared; b) explore their senses and  
12 support others' explorations; b) be non-judgmental of self/others; c) follow and respond to  
13 their own interests and d) develop a sense of play/improvisation. The Arts & Health  
14 practitioners prepared resources (including paints, drawing materials, clay, textiles and  
15 mixed-media) in response to the group members' individual and collective creative interests  
16 and skills. The group was offered 'stimulus' pieces such as books, poems, images, music  
17 and film and members were encouraged to share their own pieces of interest with the group.  
18  
19  
20  
21  
22  
23  
24  
25  
26  
27

28 Following each session, the Arts & Health practitioner briefly documented observations and  
29 reflected further to inform the selection of materials and activity for the next session.  
30

31 Practitioners also provided participants with sketchbooks and/or paper and other arts  
32 materials to support their emerging interests between sessions.  
33  
34  
35  
36  
37

38 The rationale of HoS is to provide a safe space through the medium of the Arts in which  
39 group members have the opportunity to reconnect with their internal selves through their  
40 senses and embodied knowing and connect with, and support, others. This was a face-to-  
41 face group intervention, with self-directed individual art activity opportunities between  
42 meetings. Standardisation was linked with the context and setting rather than specified  
43 activities carried out by the practitioners and participants as this was expected to vary due to  
44 the creative nature of the activity. For example, standardisation included the groups taking  
45 place in a non-medical setting, so that the Arts & Health practitioners could create and hold a  
46 safe space in which participants felt able to express themselves creatively. The focus was  
47  
48  
49  
50  
51  
52  
53  
54  
55  
56  
57  
58  
59  
60

1  
2  
3 the person not their stroke. The artists responded to and followed the interests of each  
4 participant, rather than solely 'teaching' arts skills.  
5  
6  
7

### 8 *Facilitators and venues*

9  
10 The groups were facilitated by Arts & Health practitioners, with at least 5 years' Arts & Health  
11 practice experience, who were able to support groups, create and hold a safe space, and  
12 who were willing and able to support arts practice where participants took the lead in their  
13 own discovery and exploration. Currently in the UK, Arts & Health practitioners are not  
14 required to undertake specific training but characteristically develop their practice within NHS  
15 initiatives working alongside experienced artist mentors or with respected 'Arts on  
16 Prescription' organisations. One Arts & Health practitioner led both groups in Bournemouth  
17 (CLR) and two led one group each in Cambridgeshire. They had access to expertise in  
18 stroke (CEH) and clinical psychology (FG). For the purposes of the project a researcher was  
19 also present on site, if needed. The researcher supported study administration aspects (such  
20 as travel expenses for participants) and participant completion of a scale (Doojse et al.'s  
21 social identification scale) assessing group fit/belonging.<sup>54</sup>  
22  
23  
24  
25  
26  
27  
28  
29  
30  
31  
32  
33  
34  
35

36 In Bournemouth the HoS groups (iterations 1 & 2) were held in a church hall and in  
37 Cambridgeshire they were held either in a room in a community hospital site on the edge of  
38 Cambridge city used by Headway Cambridgeshire (a local brain injury charity) (iteration 3) or  
39 a community centre in a very rural north Cambridgeshire town (iteration 4). All venues had  
40 disabled access/toilet facilities, access to water and a sink, tea/coffee-making facilities and  
41 could accommodate up to eight participants (potentially with wheelchairs) around a table.  
42 There were storage facilities (albeit limited) in Cambridgeshire but none in the Bournemouth  
43 venue. Transport was provided for those unable to make their own way to the venue.  
44  
45  
46  
47  
48  
49  
50  
51  
52  
53

### 54 *Usual Care*

1  
2  
3 In Bournemouth, support is provided by the Early Supported Discharge multidisciplinary  
4 team for 2–6 weeks after leaving hospital and then medical care via the General Practitioner  
5 (GP), with a referral to the Stroke Coordinator. People with complex medical conditions are  
6 seen by Stroke Consultants as hospital outpatients. Ongoing rehabilitation needs are met by  
7 rehabilitation teams and day hospital service provision in some areas. In Cambridgeshire,  
8 medical care is delivered via the GP and people with complex medical conditions are seen  
9 by Stroke Consultants as hospital outpatients. All can access support from the Stroke  
10 Association 'Information, Advice and Support Coordinator' and may receive additional  
11 therapy or support via one of three locality neurorehabilitation teams. Participants in both  
12 arms of the trial received usual care, and usual care was not affected by involvement in the  
13 trial.  
14  
15  
16  
17  
18  
19  
20  
21  
22  
23  
24  
25

## 26 **Descriptors and proposed outcome measures**

### 27 *Demographic/descriptor variables and stroke related information*

28  
29 At baseline the local research assistant collected information during a home visit about age,  
30 sex, marital status, educational qualifications, ethnicity, household composition, employment  
31 situation, comorbidities, medication, type of stroke, stroke side, time-since-stroke, mobility  
32 (Rivermead Assessment - Gross Motor subscale),<sup>53</sup> upper limb impairment (Motricity  
33 Index),<sup>55</sup> communication ability (Boston Severity Rating Scale),<sup>56</sup> cognitive ability  
34 (Addenbrookes Cognitive Exam – Revised; ACE-R).<sup>57</sup>  
35  
36  
37  
38  
39  
40  
41  
42  
43  
44

### 45 *Outcome measures*

46 The outcome measures (see below) were self-reported and presented in a booklet in a large  
47 font (pt. 14). At baseline, outcome measures were administered face-to-face by a research  
48 assistant in participants' homes. At approximately 5 months post-randomisation (1 month  
49 post - HoS intervention) outcome measures were administered by post, or if needed, with  
50 face-to-face or telephone support from a blinded assessor (one in each centre). At the end of  
51 the questionnaire booklet there was a question that asked whether participants had received  
52  
53  
54  
55  
56  
57  
58  
59  
60

1  
2  
3 any support from others to complete it with the following response options possible: none,  
4 researcher on phone, researcher at house, family member/friend. Participants were asked  
5 not to disclose their allocation arm to the blinded assessors. In each centre the blinded  
6 assessors were asked to guess participants' treatment allocation.  
7  
8  
9

10  
11  
12 In line with the feasibility objectives of this study, three outcome measures were included for  
13 consideration as potential candidates for the primary outcome in a subsequent full trial, as  
14 follows:  
15  
16

- 17 (i) Warwick and Edinburgh Mental Wellbeing Scale (WEMWBS)<sup>58</sup>
  - 18 (ii) Hospital Anxiety and Depression Scale (HADS)<sup>59</sup>
  - 19 (iii) ICEpop CAPability measure for adults (ICECAP-A)<sup>60</sup>
- 20  
21  
22  
23  
24  
25

26 In addition, the following outcome measures were included as potential secondary  
27 outcomes:  
28  
29

- 30 (i) Rosenberg Self-Esteem Scale (RSES)<sup>61</sup>
  - 31 (ii) Medical Outcomes Short Form-36 (SF-36 V.1)<sup>62</sup>
  - 32 (iii) Head Injury Semantic Differential Scale (HISDS-III)<sup>63</sup>
- 33  
34  
35  
36  
37

### 38 *Serious adverse events and adverse events*

39  
40 Serious adverse events (SAEs) and adverse events (AEs) were closely monitored,  
41 documented and reported as described in the study protocol.<sup>49</sup>  
42  
43  
44  
45

### 46 *Process measures*

47  
48 Doojse et al.'s social identification self-report scale<sup>54</sup> was used to measure 'sense of  
49 belonging' by participants in the HoS group at the end of the first, fifth and final session.  
50  
51  
52  
53

### 54 *Identifying, measuring and valuing resource use*

55  
56  
57  
58  
59  
60

1  
2  
3 Resources required to deliver the HoS intervention were recorded for each session on forms  
4 completed by the artist facilitators. These included artists' preparation time, travel time to  
5 and from the venue, time spent delivering the intervention, equipment and materials used,  
6 number of participants attending the sessions, venue and venue hire costs. Resources were  
7 valued using local estimates provided by the experienced artists delivering HoS. Artist  
8 facilitators' time was valued at the fixed fee of £120 per session (to cover travel, preparation  
9 and delivery costs) with an additional £25 fee for materials and £8 for refreshments. Venue  
10 hire costs in Bournemouth (iterations 1 & 2) were £40 per session, and in Cambridgeshire,  
11 £100 per session (iteration 3) and £25 per session (iteration 4). We envisage the roll-out of  
12 the HoS intervention would follow a similar model whereby the health care provider would  
13 pay the artist facilitators a fixed delivery fee. Participant travel costs to attend sessions were  
14 recorded and are reported.

15  
16  
17  
18  
19  
20  
21  
22  
23  
24  
25  
26  
27  
28 Resources required to deliver usual care in both arms were collected via a bespoke  
29 telephone-administered resource use questionnaire that asked about resources used in the  
30 period following randomisation. Participants were posted the questionnaire in advance of the  
31 telephone interview and were offered face-to-face support to complete it, if required. The  
32 questionnaire included hospital visits and admissions, use of community and social services,  
33 time off work and social activities, informal care, other sources of support, expenses incurred  
34 and medications. As service users advised us that it would be difficult to distinguish between  
35 stroke-related resource use and resource use related to co-morbidities, the questionnaire  
36 asked respondents to report resources related to all their health care needs. We assume  
37 that, in a definitive RCT, any differences between arms would result from the HoS  
38 intervention effect. To improve completion rates,<sup>64</sup> participants were provided with a  
39 resource use log to record health care visits prospectively, if they wished. Resources were  
40 valued using Curtis and Burns' Unit Costs of Health and Social Care<sup>65</sup> and the 2015  
41 Department of Health National Health Service (NHS) reference costs.<sup>66</sup> Private expenses  
42  
43  
44  
45  
46  
47  
48  
49  
50  
51  
52  
53  
54  
55  
56  
57  
58  
59  
60



1  
2  
3 were self-reported. Hours of informal care and time off work and social activities were valued  
4 using the Office for National Statistics (2015) average weekly earnings.<sup>67</sup>  
5  
6  
7

### 8 *Qualitative descriptive interviews*

9  
10 Face-to-face interviews with twelve people (8 intervention; 4 usual care) were undertaken in  
11 people's homes across both centres by CEH on two occasions: i. post-randomisation but  
12 before the HoS intervention was delivered; and ii. at study end after all outcome measures  
13 had been completed. Purposive sampling was used to capture variations that might  
14 influence perceptions including age, sex, communication disability and severity of stroke.  
15 The pre-intervention topics included why the person decided to take part in the overall study,  
16 their views on the recruitment and initial assessment process, and (intervention group only)  
17 expectations in terms of the HoS group intervention. The post-intervention topics included  
18 views on the study and outcome assessment processes and the acceptability of completing  
19 outcomes at one year follow-up in the context of a hypothetical future trial. Intervention  
20 participants were also asked about their experiences of the group, the venues, and their  
21 ability/willingness to pay their own transport costs to attend HoS.  
22  
23  
24  
25  
26  
27  
28  
29  
30  
31  
32  
33  
34  
35

## 36 **Analysis**

### 37 *Quantitative analysis*

38  
39  
40 Quantitative analysis was carried out using IBM SPSS V23.0 and STATA V14. The person  
41 undertaking the analysis was blind to allocation and group assignment was coded using 0  
42 and 1. As this is a feasibility study, analyses are primarily descriptive and focus on baseline  
43 participant characteristics and the estimation of key feasibility parameters.<sup>68</sup> Estimates of  
44 recruitment, retention and questionnaire completion rates are presented with 95%  
45 confidence intervals (CIs). Intervention attendance rates are described.  
46  
47  
48  
49  
50  
51  
52  
53  
54  
55  
56  
57  
58  
59  
60

1  
2  
3 Preliminary estimates of effect size with 95% CIs are presented for the three candidate  
4 primary outcomes to inform the plausibility of the effect sizes used in future sample size  
5 calculations. Participants were analysed in the group they were randomised to and we  
6 attempted to collect outcome measure data from everyone randomised. Missing data were  
7 assumed to be missing completely at random (MCAR) and no imputation methods were  
8 used. Analysis of covariance was used to estimate effect size for each outcome variable at  
9 follow-up, adjusting for centre and the respective baseline values. Although stroke severity  
10 was a stratification variable in the randomisation we have not adjusted for it in the analysis  
11 because of the very small number with a severe stroke. In the future trial we would also take  
12 into account clustering effects resulting from the group-based nature of the HoS  
13 intervention.<sup>69</sup> We have not taken into account clustering in the analysis presented here  
14 because (a) this is a feasibility study where the aim is not to obtain precise estimates of  
15 effect size and (b) there were just 56 participants (29 receiving the HoS intervention) and  
16 only a small number of clusters (n = 4) making it difficult to adjust for clustering. A  
17 consequence is that widths of the 95% confidence intervals are likely to be underestimated.  
18 Standardised effect sizes (Cohen's *d*) were obtained by dividing effect sizes by pooled  
19 baseline standard deviation.  
20  
21  
22  
23  
24  
25  
26  
27  
28  
29  
30  
31  
32  
33  
34  
35  
36  
37

### 38 *Economic analysis*

39 We report completion rates for the resource use categories. A preliminary estimate of the  
40 cost of delivering the HoS intervention was derived using macro-level costings. We also  
41 report artist facilitator time to deliver the intervention at the micro-level and patient travel  
42 expenses to the sessions.  
43  
44  
45  
46  
47  
48  
49

50 We further report resource use units and costs per category per trial arm, for an indication of  
51 cost drivers for the intervention for the health and social care perspective. We derived  
52 capability index scores for the ICECAP-A<sup>70</sup> and applied UK preference-based tariffs to the  
53 SF-6D to derive quality-adjusted life-years.<sup>71</sup>  
54  
55  
56  
57  
58  
59  
60

### *Qualitative analysis*

The interviews were transcribed verbatim. Responses related to the research processes such as recruitment, screening and the administration of outcome measures as well as the acceptability of the venue, the intervention, and potential willingness to pay for the intervention (latter three, intervention group only) were analysed using content analysis.<sup>72</sup> Accounts of the expectations and experiences of the intervention were analysed separately using thematic analysis.<sup>73</sup> These findings will be reported elsewhere.

## **RESULTS**

### *Study procedures, recruitment and retention rates*

Fifty-six people were randomised (88% of our original target of 64) (see Figure 1). Nearly two-thirds of the sample was male and the mean age of the sample was 70 (SD 12.1) years and mean time-since-stroke was 9 (SD 6.1) months. Approximately 80% of participants had had ischaemic strokes. Seventy percent of the sample was retired (see Table 1). One participant who had had their stroke outside the 2 year post-stroke inclusion time window (32 months post-stroke) was erroneously recruited into the study. We included this participant's data in the analysis.

*INSERT FIG 1 ABOUT HERE*

*INSERT TABLE 1 ABOUT HERE*

Participants were enrolled into the study between August 2014 and April 2015 and the final follow-up occurred in December 2015. The recruitment rate across both centres was 14% [95% CI: 11% to 17%]. In Bournemouth, an acute hospital setting, the recruitment rate was 11% [95% CI: 8% to 14%] and in Cambridgeshire, a community setting, it was 28% [95% CI: 19% to 38%].

1  
2  
3  
4  
5 In total, information about the study was given or sent to 396 people (313 in Bournemouth  
6 and 83 in Cambridgeshire). Of these, 198 people declined participation, 112 did not return  
7 the reply slip, four did not meet the inclusion criteria, 26 were excluded for 'other reasons'  
8  
9 (see Figure 1).  
10  
11  
12  
13

14 Six participants (11%) withdrew from both the study and follow-up data collection and three  
15 participants (5%) did not return the main outcome measures at follow-up. For two of the  
16 three proposed potential primary outcomes (HADS and ICECAP-A), 47/56 (84% (95% CI  
17 73% to 92%)) of randomised participants had complete baseline and follow-up data and  
18 46/56 (82% (95% CI: 70% to 91%)) had complete baseline and follow-up data for the  
19 WEMWBS.  
20  
21  
22  
23  
24  
25  
26  
27

#### 28 *Reasons for non-participation*

29  
30 Of 198 people declining participation, 89 gave reasons, the most common ones related to  
31 not being interested/feeling the intervention 'wasn't for them' (n=27) and health reasons  
32 (n=14).  
33  
34  
35  
36  
37

#### 38 *Delivery, attendance rates and group size*

39  
40 Five participants allocated to the HoS arm declined the intervention post-randomisation (see  
41 CONSORT diagram for reasons). Of the 29 participants randomised to HoS sessions 20  
42 (69%, 95% CI; 51% to 84%) attended six or more of the 10 sessions.  
43  
44  
45  
46  
47

48 Two HoS groups were delivered in Bournemouth (iterations 1 & 2) and two in  
49 Cambridgeshire (iterations 3 & 4). The timing of the HoS sessions deviated slightly from that  
50 specified in the original protocol in three of the four iterations due to venue availability and  
51 the timing of public holidays. The planned group size was 6-8 participants and this target  
52 was mostly met in iterations 1-3 with 70% (21/30) of the delivered sessions including six or  
53  
54  
55  
56  
57  
58  
59  
60

1  
2  
3 more people. In iteration 4 due to time pressures (the grant coming to an end) only 11  
4 people were randomised with six allocated to the intervention. There were two drop-outs out  
5 before the group commenced and one person withdrew after the first session meaning that  
6 90% of sessions included 3 people or fewer. A summary of attendance at the HoS groups  
7 broken down by centre and session is presented in Web Supplement Table S1. Seventy-  
8 two percent of participants randomised to the HoS arm attended the final session (session  
9 10) of the HoS group intervention.  
10  
11  
12  
13  
14  
15

16  
17  
18 Self-reported ratings on the domains of the Doojse Scale (measuring 'sense of belonging')<sup>54</sup>  
19 increased across sessions and remained high in the final session (see Table S2 in data  
20 supplement).  
21  
22  
23  
24  
25

#### 26 *Support requirements for HoS group members*

27  
28 At the Cambridgeshire centre one of the artist facilitators discussed a HoS group member's  
29 cognitive needs with FG (clinical psychology). Subsequently, several adaptations were  
30 identified and implemented such as providing a small sketchpad when needing to wait for  
31 additional support and providing instructions one step at a time.  
32  
33  
34  
35  
36  
37

#### 38 *Suitability of the outcome measures and feasibility of the assessment strategy*

39  
40 The ACE-R, originally designed as a screening tool for dementia, provides a single overall  
41 functioning standardised score, and relies heavily on language abilities. It did not prove  
42 suitable for our sample, of whom nearly half (46%) had some degree of language difficulty.  
43  
44 We have not presented the baseline descriptive data for the ACE-R as we do not feel they  
45 provide an accurate summary of the sample's cognitive abilities.  
46  
47  
48  
49  
50  
51

52 Overall, participants found the self-reported outcome measures acceptable and were able to  
53 complete them, sometimes requiring support. However, in the qualitative interviews several  
54 participants reported finding the HISDS-III<sup>63</sup> difficult to complete likely due to its relatively  
55  
56  
57  
58  
59  
60

1  
2  
3 complex language demands and the way in which the bipolar adjective pairs comprising the  
4 scale vary in direction. These difficulties were reflected in some of the response patterns  
5 obtained and corroborated by the blinded assessors' experiences. For these reasons we  
6 have not presented these data.  
7  
8  
9

10  
11  
12 Missing questionnaire data were followed-up via telephone by a research assistant  
13 (baseline) or blinded assessor (follow-up) at each centre. Levels of missing data were very  
14 low - overall, 99.8% of the questionnaire items comprising the candidate primary outcomes  
15 were completed (1809/1815 items at baseline and 1550/1551 items at follow-up) by those  
16 who provided outcomes (at baseline n= 55 and follow up n = 47).  
17  
18  
19  
20  
21  
22  
23

#### 24 *Support requirements to complete outcomes*

25  
26 At follow-up, the self-report questionnaire booklets were administered postally by default but  
27 face-to-face support was provided if required/requested. Fifty-eight percent of those with  
28 follow-up data (26/45, data for 2 cases missing) reported that they completed the  
29 questionnaire booklet with no support, 8 (18%) received support from the researcher in the  
30 home, 10 (22%) received support from family and friends and 1 (2%) received telephone  
31 support from the blinded assessor.  
32  
33  
34  
35  
36  
37  
38  
39

#### 40 *Possible primary outcomes*

41  
42 In Table 2 we present descriptives for the possible primary outcomes (WEMWBS, HADS-A,  
43 HADS-D, ICECAP-A) and descriptives for all other outcomes gathered are presented in Web  
44 Supplement Table S3.  
45  
46  
47  
48  
49

50 *INSERT TABLE 2 ABOUT HERE*

#### 51 *Completion of resource use questionnaire*

1  
2  
3 The resource use questionnaire was completed by 50/56 of participants (89%); 25/29 of  
4 patients in the HoS arm and 25/27 of patients in the usual care arm. Of these 33 (66%) were  
5 administered over the telephone, 16 (32%) face-to-face at home and 1 (2%) via the post.  
6  
7 Although not included in the original study protocol, in the Bournemouth centre duration data  
8 were logged with the 19 telephone interviews lasting 23 minutes (SD=10) on average and  
9 the 8 face-to-face administrations in the home an average of 38 minutes (SD=13).  
10  
11  
12  
13

14  
15  
16 Completion rates of resource use categories were high and similar between the arms of the  
17 trial (Table 3). The least completed category was community based services such as primary  
18 care visits (see Table 3) with 90% complete data for this category (both trial arms  
19 combined). Seventy-nine percent complete data (out of the full sample) is available for an  
20 economic analysis from the health and social care perspective.  
21  
22  
23  
24  
25  
26  
27

28 *INSERT TABLE 3 ABOUT HERE*  
29  
30  
31

### 32 *Assessor allocation guesses*

33  
34 At the Cambridgeshire centre, due to a delay in receiving approval for patient access for the  
35 blinded assessor, the unblinded research assistant administered outcomes to six  
36 participants. Overall 50/56 participants (Cambridgeshire = 23; Bournemouth = 27) completed  
37 questionnaire outcomes and/or telephone health use questionnaires at follow-up. In  
38 Cambridgeshire, the blinded assessor correctly guessed allocation on 9/17 (53%) occasions  
39 ( $p = 1.00$  using the exact binomial test to compare with expected percentage of 50%) (NB.  
40 the six outcome assessment occasions in Cambridgeshire that were not undertaken by a  
41 blinded assessor are excluded). In Bournemouth, the blinded assessor correctly guessed  
42 allocation on 24/27 (89%) occasions ( $p < .001$ ). Thus overall the blinded assessors correctly  
43 guessed allocation on 33/44 (75%; 95% CI 61% to 85%) occasions,  $p = 0.001$ .  
44  
45  
46  
47  
48  
49  
50  
51  
52  
53  
54  
55

### 56 *Serious adverse events and adverse events*

57  
58  
59  
60

1  
2  
3 Five serious adverse events were reported during the study period. None was deemed  
4 related to the intervention. These included admissions to hospital for bunion removal, facial  
5 weakness and vomiting, atrial fibrillation, pneumonia, and a transient ischaemic attack.  
6  
7  
8  
9

10 Five adverse events were noted. None was deemed related to the intervention. Four people  
11 attended the Emergency Department but were not admitted (water retention, fall at home,  
12 fall in the road, anxiety). One person sustained a minor injury to their arm at home.  
13  
14  
15  
16

### 17 18 *Cost of delivering the HoS intervention*

19  
20 The cost of delivering the HoS intervention was £1,960 in Bournemouth and £2,530 in  
21 Cambridgeshire, reflecting higher venue hire costs in Cambridgeshire (see Table 4). On  
22 average, six participants attended the two HoS iterations held in Bournemouth and four  
23 attended the two HoS iterations held in Cambridgeshire. The HoS intervention would cost  
24 the health care payer, on average, £327 per participant in Bournemouth and £657 in  
25 Cambridgeshire. The cost could be as low as £245 per participant at full capacity of 8  
26 people.  
27  
28  
29  
30  
31  
32  
33  
34  
35

36  
37 *INSERT TABLE 4 ABOUT HERE*  
38  
39

### 40 *Health-related quality of life gain, resource use and costs*

41  
42 Table 5 reports the quality adjusted life year (QALY) gains from baseline and resource use  
43 and costs for the HoS and usual care arms. Potential cost drivers for the intervention are  
44 inpatient and outpatient appointments and contacts with a social worker.  
45  
46  
47  
48  
49

50  
51 *INSERT TABLE 5 ABOUT HERE*  
52

### 53 *Qualitative*

54 All 12 people who were purposively sampled for interview (8 intervention, 4 usual care) were  
55 interviewed on two occasions (male = 7, female = 5; mean age = 70 years (range 51-83  
56  
57  
58  
59  
60



1  
2  
3 years); mean time-since-stroke = 7 months (range 4-12 months)). Most had had a mild, and  
4 one a moderately disabling, stroke. Nine had an affected arm and five had speech  
5 difficulties. All participants found the research processes acceptable and the screening and  
6 outcome measures easy to complete with the support provided. One person commented  
7 negatively on the cognitive assessment as her husband who lived with dementia had had to  
8 complete it in the past. One person noted they would have liked more opportunities for open  
9 answers on the questionnaires so they could provide some explanations about their  
10 responses. All interviewees would have been happy to complete outcome measures at 4  
11 and 12 months follow up, if asked. They valued receiving the economic checklist which some  
12 completed over the specified time period and others used to supplement the telephone  
13 interviews.  
14  
15  
16  
17  
18  
19  
20  
21  
22  
23  
24  
25

26 Timing of sessions (held in the morning) and session duration (2 hours) were acceptable.  
27 While the venues were found to be acceptable, a few people mentioned that they would  
28 have liked access to a café where they could meet following the HoS sessions. Participants  
29 in Bournemouth were willing to pay up to £10 per session for transport if required. As all but  
30 one interviewee in Cambridgeshire drove to sessions (it was a much more rural setting than  
31 Bournemouth) and were happy to do so, transport costs were not discussed during the  
32 interviews. The one interviewee who used transport in Cambridgeshire only attended one  
33 session due to health issues (unrelated to stroke). Findings related to expectations and  
34 experiences of taking part in the groups will be reported elsewhere.  
35  
36  
37  
38  
39  
40  
41  
42  
43  
44  
45

## 46 **DISCUSSION**

### 47 **Main findings**

48  
49 This is the first study to formally test the feasibility of an Arts & Health intervention for people  
50 post-stroke in the community. While there are two other RCTs of Arts and Health  
51 interventions in stroke<sup>46,47</sup> both of these involved inpatients in a rehabilitation setting rather  
52  
53  
54  
55  
56  
57  
58  
59  
60

1  
2  
3 than people living in the community. One involved a creative art intervention that, unlike HoS  
4 was highly prescribed, making direct comparisons difficult.  
5  
6  
7

8  
9 Attendance at the HoS intervention groups was high. The majority of people who took part  
10 in the HoS groups highly valued them, with many reporting increased confidence both within  
11 and outside the groups. The numbers who declined the intervention were similar to those  
12 reported in the Morris et al. study.<sup>47</sup> Study retention was good with follow-up data for  
13 available for 84% of participants and data completion rates were high (> 80% for the  
14 candidate primary outcome measures).  
15  
16  
17  
18  
19

20  
21  
22 The structured breaks between the HoS sessions were potentially instrumental in  
23 encouraging participants to continue art work outside the group. The links created with local  
24 arts and health practitioners led to some participants continuing more independent creative  
25 practice after the research ended. Important practical considerations include ensuring that  
26 venues are on public or community transport routes, have free and disabled car parking  
27 facilities, heating/air conditioning and drink-making facilities. In the full multi-centre trial, to  
28 maximise recruitment and be as inclusive as possible, transport will be provided, if required.  
29  
30  
31  
32  
33  
34  
35  
36  
37

38  
39 The included outcome measures were mostly acceptable (but see limitations section) with  
40 some participants requiring support to complete them. The possible primary outcome  
41 measures for the future trial (WEMWBS, HADS-D, HADS-A, ICECAP-O) all demonstrated  
42 change in the direction of benefit for the HoS arm. In Morris et al.'s randomised controlled  
43 feasibility study of a visual arts participation intervention for stroke inpatients, a quality of life  
44 scale was initially envisaged to be the likely primary outcome for a future trial. However, their  
45 findings suggested that a measure of emotional wellbeing (the Positive and Negative Affect  
46 Scale) would be a more relevant primary outcome measure. Similarly, in the current study a  
47 measure of emotional wellbeing (HADS-D) is the main contender for the primary outcome in  
48  
49  
50  
51  
52  
53  
54  
55  
56  
57  
58  
59  
60

1  
2  
3 a subsequent definitive trial and, with medium standardised effect sizes, it is likely that such  
4 a trial would be feasibly sized.  
5  
6  
7

8  
9 We have used novel dissemination methods such as making a short film involving people  
10 who had attended the HoS groups in Bournemouth, holding an art exhibition in both  
11 Bournemouth and Cambridgeshire to showcase the creations of the HoS group members.  
12  
13  
14

#### 15 16 *Limitations; Implications for a future trial*

17  
18 We did not quite reach our original recruitment target and the overall recruitment rate was  
19 low (though not unlike that reported in another community-based study<sup>74</sup>). In the current  
20 study the recruitment rate in the community setting (28%) was higher than that via hospitals  
21 (11%). This might be because in Cambridgeshire recruitment was undertaken by clinicians  
22 working in the community who often had a long-standing relationship with their clients. In  
23 contrast, at Bournemouth and Christchurch hospitals, while some potential participants were  
24 known and approached directly by the research nurses, others were identified from clinical  
25 databases and sent study information in the post.  
26  
27  
28  
29  
30  
31  
32  
33  
34  
35

36 The most common reason for people declining participation in the current study was  
37 because they felt the intervention 'wasn't for them'. Similarly Morris et al., (2017)<sup>46</sup> also  
38 reported that the majority of people declined participation in their feasibility study of a visual  
39 arts participation programme because they were ambivalent about art participation.  
40  
41  
42  
43  
44  
45  
46  
47  
48  
49  
50  
51  
52  
53  
54  
55  
56  
57  
58  
59  
60

Modifying the description of the HoS intervention, such as referring to it as 'an opportunity to reconnect with and gain confidence in everyday life', rather than calling it an arts intervention could be one way to enhance recruitment. Morris et al. (2017) suggested that provision of taster sessions may be another means of improving study enrolment<sup>47</sup> though we note a risk of jeopardising equipoise or increasing the likelihood of resentful demoralisation.

Additionally, we could extend the eligibility criteria by providing additional support so that people who require support with toileting needs could attend, though this would have cost

1  
2  
3 implications. Finally, we could also expand the recruitment strategy to include primary care.  
4  
5 We will continue to consult with service users and stakeholders to seek their advice on ways  
6  
7 of increasing recruitment rates and how best to convey the essence of the intervention to  
8  
9 people.

10  
11  
12 The resource use data obtained in this feasibility study provide insights into the main  
13  
14 potential cost drivers for the intervention meaning that we can refine and shorten the  
15  
16 resource use questionnaire for the definitive trial. While administering the resource use  
17  
18 questionnaire by telephone resulted in high levels of data completeness, maintaining  
19  
20 assessor blinding at follow-up proved challenging, particularly in the Bournemouth centre. To  
21  
22 try to increase the success of assessor blinding, we will add instructions on the printed  
23  
24 versions of the outcome measures that emphasise the importance of not disclosing  
25  
26 allocation group and will reword the question in the resource use questionnaire that asks  
27  
28 about contacts with charities, social or activity groups. We will also seek patient and public  
29  
30 involvement advice about how we can best convey the message not to disclose allocation at  
31  
32 the start of the telephone resource use interview and, based on this, will create a standard  
33  
34 script. We will provide training for the blinded assessors.

35  
36  
37  
38 Some participants reported finding the HISDS-III difficult to complete. For these reasons we  
39  
40 would not include this outcome in a future trial. The ACE-R also proved problematic due to  
41  
42 its heavy reliance on language abilities. It will be important to identify a more appropriate  
43  
44 way to evaluate specific domains of cognitive functioning for the future trial. One possibility is  
45  
46 the recently developed Oxford Cognitive Screen<sup>75</sup> which has been designed specifically with  
47  
48 a stroke population in mind and is purportedly inclusive for individuals with aphasia and  
49  
50 neglect. While only short-term follow-up was included in this feasibility study, a future  
51  
52 definitive study would include longer term 12 month follow-up.  
53  
54  
55  
56  
57  
58  
59  
60

1  
2  
3 The idea for the HoS intervention originated from a stroke survivor (and co-author) (RC) who  
4 had identified a gap in service provision. Since then, Arts & Health approaches are  
5 beginning to be recognised by policy makers as a useful way to support the health and  
6 wellbeing of communities.<sup>39</sup> With NHS pressures and difficulties of accessing formal  
7 services<sup>76</sup> our relatively low cost intervention (which could be as low as £245 per person if  
8 delivered at full capacity) offers potential to form part of a comprehensive long term support  
9 pathway to reduce depression following a stroke and increase community access and  
10 participation. As we look ahead to a future definitive trial it will be important to draw upon  
11 implementation science expertise and to consult with key stakeholders. This will help us to  
12 ensure that the HoS intervention, if found to be effective and cost-effective, can be rolled out  
13 within existing health service and social care structures and is designed in such a way so as  
14 to facilitate its rapid adoption and implementation into practice.  
15  
16  
17  
18  
19  
20  
21  
22  
23  
24  
25  
26  
27

### 28 **Acknowledgements**

29  
30 We would like to thank the Study Sponsor, the Royal Bournemouth and Christchurch  
31 Hospitals (RBCH) NHS Foundation Trust. We would like to acknowledge the Stroke  
32 Research Network Rehabilitation Clinical Subgroup for supporting our initial  
33 development work and the Research Design Service (South West) for providing  
34 invaluable advice on study design, methodology, and grantsmanship. We would like  
35 to thank Elliot Carter from the Peninsula Clinical Trials Unit at Plymouth University for  
36 designing and implementing a bespoke web-based randomisation system. We would  
37 like to thank the patient and public involvement group and Dr Catherine Ford for providing  
38 key input into aspects of study design, outcome measures and study materials. We would  
39 also like to thank Dr Susan Hunter, Professor Fiona Jones and Catherine Ovington for  
40 agreeing to be members of the Study Steering group. We would like to thank the Stroke  
41 Research team at RBCH and the Community Neuro-rehabilitation teams in Cambridgeshire  
42 for their invaluable help with recruitment. We would like to thank all the participants who took  
43 part and for their contributions to dissemination activities including a video, press releases  
44  
45  
46  
47  
48  
49  
50  
51  
52  
53  
54  
55  
56  
57  
58  
59  
60

1  
2  
3 and interviews, art exhibitions held in each centre and a workshop at the UK National Stroke  
4 Forum and to FB and MDBD for the images of their work. Finally we would like to  
5  
6 acknowledge and extend our thanks to the National Institute for Health Research who  
7  
8 funded this study through the Research for Patient Benefit programme.  
9

### 10 11 12 **Contributors**

13  
14 CEH and ST are equal contributors and joint first authors. CEH (Chief Investigator), FG  
15 (Principal Investigator, Cambridge Centre), CLR and RC were involved in the conception of  
16 the study and CEH, ST and FG led the design. CEH with ST and FG led the writing of initial  
17 grant application and protocol. DJ and FG advised on clinical aspects related to the grant  
18 application, PT led the statistical component of the study, EM led the economic evaluation,  
19 supported by TP and KG and FR advised on the qualitative aspects. MG and SN refined  
20 aspects of the draft protocol. MG coordinated the study on a day-to-day basis. CT and AW  
21 organised and administered the blinded assessments. ST and CEH drafted the manuscript,  
22 FG, MG, PT and EM provided detailed feedback and all other authors critically reviewed and  
23 approved the final version.  
24  
25  
26  
27  
28  
29  
30  
31  
32  
33  
34  
35

### 36 **Competing interests**

37  
38 None  
39  
40  
41

### 42 **Funding**

43  
44 This paper presents independent research funded by the National Institute for Health  
45 Research (NIHR) under its Research for Patient Benefit (RfPB) Programme (Grant  
46 Reference Number PB-PG-0212-27054). The views expressed are those of the  
47 author(s) and not necessarily those of the NHS, the NIHR or the Department of  
48 Health. This study is included in the National Institute of Health Research Clinical  
49 Network (NIHR CRN) portfolio.  
50  
51  
52  
53  
54  
55  
56  
57  
58  
59  
60

1  
2  
3 We were awarded funding from the National NIHR-SRN Rehabilitation Clinical  
4  
5 Subgroup to bring the research team together and prepare the grant application.  
6  
7 FG was supported by NIHR Flexibility and Sustainability Funding via Cambridgeshire  
8  
9 Primary Care Trust R&D Department.  
10

### 11 12 13 **Ethics approval**

14  
15 Ethics approval was granted by the Exeter NRES Committee (REC Ref 13/SW/0136)  
16  
17 on 30/07/13. Local Research and Development approval was granted by the Royal  
18  
19 Bournemouth and Christchurch Hospital NHS Foundation Trust on 06/05/14. This Trust  
20  
21 is the study sponsor. Local Research and Development approval was granted by  
22  
23 Cambridgeshire Community Services NHS Trust on 29/05/14.  
24  
25  
26  
27  
28

### 29 **Provenance and peer review**

30  
31 Not commissioned; peer reviewed for ethical and funding approval prior to submission.  
32  
33  
34  
35

### 36 **Data Sharing Statement:**

37  
38 Requests for de-identified data should be directed to the corresponding author.  
39  
40  
41  
42  
43  
44  
45  
46  
47  
48  
49  
50  
51  
52  
53  
54  
55  
56  
57  
58  
59  
60

Table 1: Baseline clinical and demographic descriptives for the sample

| Descriptor                                                        | Usual Care (UC)<br>(n=27) | HeART of Stroke (HoS)<br>(n=29) | Entire cohort<br>(n=56) |
|-------------------------------------------------------------------|---------------------------|---------------------------------|-------------------------|
| <b>Sex [n (%)]</b>                                                |                           |                                 |                         |
| ▪ Female; Male                                                    | 7 (26%); 20 (74%)         | 17 (59%); 12 (41%)              | 24 (43%); 32 (57%)      |
| <b>Age (years) Mean (SD) range</b>                                | 67.4 (12.83) 39-88        | 72.0 (11.22) 27-87              | 69.8 (12.1) 27-88       |
| <b>Ethnicity</b>                                                  |                           |                                 |                         |
| ▪ White English                                                   | 25 (93%)                  | 23 (79%)                        | 48 (86%)                |
| ▪ White other British                                             | 1 (4%)                    | 5 (17%)                         | 6 (11%)                 |
| ▪ Mixed- white and Asian                                          | 1 (4%)                    | -                               | 1 (2%)                  |
| ▪ Black or Black British – African                                | -                         | 1 (3%)                          | 1 (2%)                  |
| <b>Time-since-stroke (months) Median (IQR) range*</b>             | 7 (5) 2-19                | 7 (7) 1-32                      | 7 (5) 1-32              |
| <b>Stroke type [n (%)]</b>                                        |                           |                                 |                         |
| ▪ Ischaemic/thrombotic                                            | 6 (22%)                   | 5 (17%)                         | 11 (20%)                |
| ▪ Ischaemic/embolic                                               | 1 (4%)                    | 1 (3%)                          | 2 (4%)                  |
| ▪ Haemorrhagic/Intracerebral                                      | 2 (7%)                    | 2 (7%)                          | 4 (7%)                  |
| ▪ Haemorrhagic subarachnoid                                       | -                         | 1 (3%)                          | 1 (2%)                  |
| ▪ Ischaemic/type unknown                                          | 13 (48%)                  | 16 (55%)                        | 29 (52%)                |
| ▪ Haemorrhagic/type unknown                                       | 4 (15%)                   | 3 (10%)                         | 7 (13%)                 |
| ▪ Type unknown                                                    | 1 (4%)                    | 1 (3%)                          | 2 (4%)                  |
| <b>Stroke severity (Rivermead Gross motor assessment) [n (%)]</b> |                           |                                 |                         |
| Total Score ≤ 6                                                   | 1 (4%)                    | 2 (7%)                          | 3 (5%)                  |
| Total Score ≥ 7                                                   | 26 (96%)                  | 27 (93%)                        | 53 (95%)                |
| <b>Stroke side [n (%)]</b>                                        |                           |                                 |                         |
| ▪ Left CVA                                                        | 11 (42%)                  | 15 (52%)                        | 26 (47%)                |
| ▪ Right CVA                                                       | 13 (50%)                  | 11 (38%)                        | 24 (44%)                |
| ▪ Both sides                                                      | 1 (4%)                    | 3 (10%)                         | 4 (7%)                  |
| ▪ Not applicable                                                  | 1 (4%)                    | -                               | 1 (2%)                  |
| ▪ System missing                                                  | 1                         | -                               | 1                       |
| <b>Centre [n (%)]</b>                                             |                           |                                 |                         |
| ▪ Bournemouth                                                     | 16 (59%)                  | 17 (59%)                        | 33 (59%)                |
| ▪ Cambridgeshire                                                  | 11 (41%)                  | 12 (41%)                        | 23 (41%)                |
| <b>Level of education [n (%)]</b>                                 |                           |                                 |                         |
| Highest qualification achieved:                                   |                           |                                 |                         |
| ▪ No qualifications                                               | 3 (12%)                   | 8 (30%)                         | 11 (20%)                |
| ▪ One or more GCSE                                                | 4 (16%)                   | 4 (15%)                         | 8 (14%)                 |
| ▪ One or more A level                                             | 5 (20%)                   | 1 (4%)                          | 6 (11%)                 |
| ▪ First degree or higher                                          | 1 (4%)                    | 5 (19%)                         | 6 (11%)                 |
| ▪ Other                                                           | 12 (48%)                  | 9 (33%)                         | 21 (38%)                |
| ▪ System missing                                                  | 2                         | 2                               | 4 (7%)                  |
| <b>Pre-stroke employment status</b>                               |                           |                                 |                         |
| ▪ Retired                                                         | 14 (52%)                  | 25 (86%)                        | 39 (70%)                |
| ▪ Full-time employment                                            | 3 (11%)                   | 1 (3%)                          | 4 (7%)                  |
| ▪ Part-time employment                                            | 3 (11%)                   | 1 (3%)                          | 4 (7%)                  |
| ▪ Self-employed                                                   | 2 (7%)                    | 1 (3%)                          | 3 (5%)                  |
| ▪ Other (unemployed; homemaker)                                   | 5 (19%)                   | 1 (3%)                          | 6 (11%)                 |
| <b>Marital status [n (%)]</b>                                     |                           |                                 |                         |
| ▪ Single                                                          | 4 (15%)                   | 3 (10%)                         | 7 (13%)                 |
| ▪ Married/cohabiting                                              | 17 (63%)                  | 13 (45%)                        | 30 (54%)                |
| ▪ Separated/divorced                                              | 3 (11%)                   | 3 (10%)                         | 6 (11%)                 |
| ▪ Widowed                                                         | 3 (11%)                   | 10 (34%)                        | 13 (23%)                |
| <b>Household composition</b>                                      |                           |                                 |                         |
| ▪ Living alone                                                    | 9 (33%)                   | 13 (45%)                        | 23 (41%)                |
| ▪ Living with others                                              | 18 (67%)                  | 15 (52%)                        | 32 (57%)                |



| Descriptor                          | Usual Care (UC)<br>(n=27) | HeART of Stroke (HoS)<br>(n=29) | Entire cohort<br>(n=56) |
|-------------------------------------|---------------------------|---------------------------------|-------------------------|
| ▪ Sheltered housing                 | -                         | 1 (3%)                          | 1 (2%%)                 |
| <b>Taking medication for mood</b>   |                           |                                 |                         |
| ▪ No                                | 21 (78%)                  | 24 (86%)                        | 10 (18%)                |
| ▪ Yes                               | 6 (22%)                   | 4 (14%)                         | 45 (82%)                |
| ▪ System missing                    | -                         | 1                               | 1                       |
| <b>Communication difficulties†</b>  |                           |                                 |                         |
| ▪ No                                | 18 (67%)                  | 12 (59%)                        | 30 (54%)                |
| ▪ Yes                               | 9 (33%)                   | 17 (41%)                        | 26 (46%)                |
| <b>Motricity Index Total Score*</b> |                           |                                 |                         |
| Median (IQR) N                      | 86.3 (27) 12-100, 27      | 81.0 (29) 1-100, 29             | 83.6 (27) 56            |

\*NB for one case one item was missing and was replaced by the mean

† Boston Severity Rating Scale

\*Although the inclusion criterion for the study was ≤ 24 months post stroke we erroneously recruited one participant at 32 months post stroke and this participant's data are included in the analysis.

**Table 2: Descriptives and preliminary estimates of effect size for potential primary outcomes**

| Outcome measure                                                                                                                                | Baseline<br>N=56 | Mean<br>difference<br>(95% CI) | Post<br>N=47    | Standardised<br>Effect Size<br>(Cohen's <i>d</i> ) |
|------------------------------------------------------------------------------------------------------------------------------------------------|------------------|--------------------------------|-----------------|----------------------------------------------------|
| <b>Warwick and Edinburgh Mental Well Being Scale (WEMWBS)</b> (potential range 14-70, higher scores greater wellbeing)                         |                  |                                |                 |                                                    |
| UC mean (SD) N                                                                                                                                 | 48.8 (10.64) 26  |                                | 48.0 (8.40) 21  |                                                    |
| HoS mean (SD) N                                                                                                                                | 46.9 (8.94) 29   |                                | 48.4 (10.28) 25 |                                                    |
| Mean diff [95% CI] in change from baseline (unadjusted)                                                                                        |                  | 2.25 [-2.83, 7.32]             |                 | 0.23                                               |
| Mean diff [95% CI] in change from baseline (adjusted for centre & baseline score)                                                              |                  | 1.14 [-3.42, 5.70]             |                 | 0.12                                               |
| <b>Hospital Anxiety and Depression Scale (HADS) Anxiety subscale</b> (potential range 0-21 each subscale, higher scores greater anxiety)       |                  |                                |                 |                                                    |
| UC mean (SD) N                                                                                                                                 | 7.4 (3.72) 27    |                                | 7.0 (4.13) 22   |                                                    |
| HoS mean (SD) N                                                                                                                                | 7.2 (4.29) 29    |                                | 6.3 (3.74) 25   |                                                    |
| Mean diff [95% CI] in change from baseline (unadjusted)                                                                                        |                  | -0.47 [-2.48, 1.54]            |                 | -0.12                                              |
| Mean diff [95% CI] in change from baseline (adjusted for centre & baseline score)                                                              |                  | -0.55 [-2.39, 1.28]            |                 | -0.14                                              |
| <b>Hospital Anxiety and Depression Scale (HADS) Depression subscale</b> (potential range 0-21 each subscale, higher scores greater depression) |                  |                                |                 |                                                    |
| UC mean (SD) N                                                                                                                                 | 4.8 (2.68) 27    |                                | 6.1 (3.33) 22   |                                                    |
| HoS mean (SD) N                                                                                                                                | 6.6 (3.76) 29    |                                | 6.0 (4.18) 25   |                                                    |
| Mean diff [95% CI] in change from baseline (unadjusted)                                                                                        |                  | -1.82 [-3.42, -0.22]           |                 | -0.56                                              |
| Mean diff [95% CI] in change from baseline (adjusted for centre & baseline score)                                                              |                  | -1.46 [-3.12, 0.21]            |                 | -0.45                                              |
| <b>ICECAP-A tariff</b> (potential range 0-1, higher scores greater capability)                                                                 |                  |                                |                 |                                                    |
| UC mean (SD) N                                                                                                                                 | 0.81 (0.14) 26   |                                | 0.78 (0.15) 21  |                                                    |
| HoS mean (SD) N                                                                                                                                | 0.75 (0.16) 29   |                                | 0.76 (0.22) 25  |                                                    |
| Mean diff [95% CI] in change from baseline (unadjusted)                                                                                        |                  | 0.05 [-0.03, 0.13]             |                 | 0.33                                               |
| Mean diff [95% CI] in change from baseline (adjusted for centre & baseline score)                                                              |                  | 0.04 [-0.05, 0.12]             |                 | 0.26                                               |

Where high scores indicate better outcomes, positive effect sizes suggest benefit for the HoS arm.

Where low scores indicate better outcomes, negative effect sizes suggest benefit for the HoS arm.

Table 3: Completeness of resource use data

|                                       | N<br>complete<br>data | % of<br>questionnaires<br>filled in<br>(n=25) | % of<br>sample<br>(n=29) | N<br>complete<br>data | % of<br>questionnaires<br>filled in<br>(n=25) | % of<br>sample<br>(n=27) |
|---------------------------------------|-----------------------|-----------------------------------------------|--------------------------|-----------------------|-----------------------------------------------|--------------------------|
|                                       | Intervention          |                                               |                          | Usual Care            |                                               |                          |
| <b>Health and social care</b>         |                       |                                               |                          |                       |                                               |                          |
| Outpatient visits                     | 25                    | 100%                                          | 86%                      | 25                    | 100%                                          | 93%                      |
| Inpatient visits                      | 25                    | 100%                                          | 86%                      | 25                    | 100%                                          | 93%                      |
| Community based services              | 21                    | 84%                                           | 72%                      | 24                    | 96%                                           | 89%                      |
| Personal social services              | 25                    | 100%                                          | 86%                      | 24                    | 96%                                           | 89%                      |
| Total health and social care          | 21                    | 84%                                           | 72%                      | 23                    | 92%                                           | 85%                      |
| <b>Further resource use collected</b> |                       |                                               |                          |                       |                                               |                          |
| Time off work                         | 25                    | 100%                                          | 86%                      | 23                    | 92%                                           | 85%                      |
| Time off normal activities            | 25                    | 100%                                          | 86%                      | 25                    | 100%                                          | 93%                      |
| Hours of help per week                | 21                    | 84%                                           | 72%                      | 24                    | 96%                                           | 89%                      |
| Private therapies used                | 25                    | 100%                                          | 86%                      | 25                    | 100%                                          | 93%                      |
| Charity/support group contacts        | 25                    | 100%                                          | 86%                      | 25                    | 100%                                          | 93%                      |

**Table 4: HoS delivery costs**

| <b>Cost of delivering HoS</b>                            | <b>Bournemouth</b> | <b>Cambridgeshire</b> |
|----------------------------------------------------------|--------------------|-----------------------|
| <i>Costs for 10 sessions</i>                             |                    |                       |
| Artist fee                                               | £1,200             | £1,200                |
| Venue cost                                               | £430               | £1,000                |
| Materials cost                                           | £330               | £330                  |
| <b>Total</b>                                             | <b>£1,960</b>      | <b>£2,530</b>         |
| Mean no. of participants per session                     | 6.0                | 3.85                  |
| Cost of HoS per participant (based on mean attendance)   | £327               | £657                  |
| Cost of HoS per participant at capacity (8 attendees)    | £245               | £316                  |
| <b>Reporting micro-level resource use to deliver HoS</b> |                    |                       |
| <i>Artist time (in mean hours):</i>                      |                    |                       |
| Session duration                                         | 20.0               | 20.5                  |
| Preparation time                                         | 20.0               | 10.6                  |
| Travel time                                              | 15.0               | 15.6                  |
| <b>Total intervention time</b>                           | <b>55.0</b>        | <b>46.7</b>           |
| Participant travel costs                                 | £1,021             | £658                  |

**Table 5: Outcomes resource use and cost of delivering care in both arms**

|                                    | HoS Intervention |         |          |      |           |      | Usual care |         |          |      |           |      |
|------------------------------------|------------------|---------|----------|------|-----------|------|------------|---------|----------|------|-----------|------|
|                                    | N                | N users | Mean use | SD   | Mean cost | SD   | N          | N users | Mean use | SD   | Mean cost | SD   |
| <b>Outcomes</b>                    |                  |         |          |      |           |      |            |         |          |      |           |      |
| QALYs gained (SF6D)                | 22               | -       | 0.18     | 0.03 | -         | -    | 21         | -       | 0.17     | 0.02 | -         | -    |
| <b>Inpatient and A &amp; E</b>     |                  |         |          |      |           |      |            |         |          |      |           |      |
| Inpatient admissions               | 25               | 3       | 0.9      | 3.0  | £49       | £136 | 25         | 3       | 0.7      | 2.8  | £96       | £308 |
| A & E or hospital admissions       | 25               | 4       | 0.2      | 0.4  | £22       | £53  | 25         | 6       | 0.2      | 0.4  | £34       | £61  |
| <b>Outpatient appointments</b>     |                  |         |          |      |           |      |            |         |          |      |           |      |
| Stroke rehabilitation              | 25               | 1       | 0.0      | 0.2  | £10       | £50  | 25         | 2       | 0.1      | 0.3  | £20       | £69  |
| Physiotherapy                      | 25               | 3       | 0.3      | 1.2  | £6        | £23  | 25         | 4       | 1.0      | 2.9  | £20       | £56  |
| Occupational therapy               | 25               | 1       | 0.0      | 0.2  | £1        | £4   | 25         | 3       | 0.2      | 0.5  | £3        | £9   |
| Speech and language therapy        | 25               | 2       | 0.2      | 0.8  | £4        | £16  | 25         | 2       | 0.4      | 1.6  | £7        | £30  |
| Psychologist                       | 25               | 0       | 0.0      | 0.0  | £0        | £0   | 25         | 0       | 0.0      | 0.0  | £0        | £0   |
| Dietician                          | 25               | 0       | 0.0      | 0.0  | £0        | £0   | 25         | 0       | 0.0      | 0.0  | £0        | £0   |
| Other outpatient appointments      | 25               | 14      | 1.2      | 1.5  | £140      | £210 | 25         | 13      | 2.0      | 3.2  | £196      | £393 |
| <b>Community-based services</b>    |                  |         |          |      |           |      |            |         |          |      |           |      |
| GP contacts                        | 24               | 17      | 1.9      | 1.5  | £92       | £79  | 25         | 18      | 1.6      | 2.0  | £72       | £83  |
| GP nurse contacts                  | 25               | 11      | 1.6      | 3.0  | £22       | £44  | 25         | 16      | 2.0      | 3.1  | £26       | £40  |
| Physiotherapy contacts             | 25               | 3       | 0.3      | 1.2  | £6        | £23  | 25         | 2       | 0.9      | 3.7  | £19       | £78  |
| SALT contacts                      | 24               | 3       | 0.4      | 1.3  | £25       | £82  | 25         | 3       | 1.1      | 3.5  | £94       | £308 |
| Occupational therapy at home       | 25               | 1       | 0.2      | 0.8  | £5        | £25  | 25         | 2       | 0.2      | 0.9  | £7        | £27  |
| Repeat prescriptions from GP       | 23               | 16      | 4.0      | 5.6  | £5        | £7   | 24         | 18      | 4.0      | 4.3  | £5        | £5   |
| Other community-based appointments | 21               | 2       | 0.4      | 1.4  | £25       | £77  | 24         | 1       | 0.3      | 1.6  | £28       | £143 |
| <b>Personal social services</b>    |                  |         |          |      |           |      |            |         |          |      |           |      |
| Home care worker contacts          | 25               | 0       | 0.0      | 0.0  | £0        | £0   | 24         | 2       | 0.9      | 3.4  | £11       | £41  |
| Social worker contacts (hours)     | 25               | 2       | 0.4      | 1.6  | £28       | £127 | 25         | 3       | 0.3      | 0.9  | £24       | £72  |
| Food at home services (meals)      | 25               | 0       | 0.0      | 0.0  | £0        | £0   | 25         | 1       | 0.6      | 3.2  | £4        | £21  |

## References

1. Townsend N, Wickramasinghe K, Bhatnagar P, et al. Coronary heart disease statistics. A compendium of health statistics. 2012 Edn. London: British Heart Foundation, 2012.
2. Department of Health. National stroke strategy. London: Department of Health, 2007.
3. Salter K, Hellings C, Foley N, et al. The experience of living with stroke: a qualitative meta-synthesis. *J Rehabil Med* 2008;40:595–602.
4. Hole E, Stubbs B, Roskell C, Soundy A. The patient's experience of the psychosocial process that influences identity following stroke rehabilitation: a metaethnography. *Sci World J* 2014;2014:349151
5. Pollock A, St George B, Fenton M, Firkins L. Top ten research priorities relating to life after stroke. *Lancet Neurol* 2012;11:209. doi: 10.1016/S1474-4422(12)70029-7.
6. Ayerbe L, Salma A, Wolfe CD, Rudd AD. Natural history, predictors and outcomes of depression after stroke: Systematic review and meta-analysis. *The Br J Psychiatry* 2013; 202:14-21.
7. Hackett ML, Pickles K. Part I: frequency of depression after stroke: an updated systematic review and meta-analysis of observational studies. *Int J Stroke* 2014 Dec;9(8):1017-25. doi: 10.1111/ijss.12357. Epub 2014 Aug 12.
8. Cant R. Rehabilitation following a stroke: a participant perspective. *Disabil Rehabil* 1997;19:297–304.

- 1  
2  
3 9. Gracey F, Palmer S, Rous B, et al. "Feeling part of things": personal construction of self  
4 after brain injury. *Neuropsychol Rehabil* 2008;18:627–50.  
5  
6  
7  
8  
9 10. Ellis-Hill C, Horn S. Change in identity and self-concept: a new theoretical approach to  
10 recovery following a stroke. *Clinical Rehabil* 2000;14:299-307.  
11  
12  
13  
14 11. Haslam C, Holme A, Haslam SA, et al. Maintaining group memberships: social identity  
15 continuity predicts well-being after stroke. *Neuropsychol Rehabil* 2008;18:671–91.  
16  
17  
18  
19  
20 12. Bulley C, Shiels J, Wilkie K, et al. Carer experiences of life after stroke—a qualitative  
21 analysis. *Disabil Rehabil* 2010;32:1406–13.  
22  
23  
24  
25  
26 13. Rigby H, Gubitz G, Eskes G, et al. Caring for stroke survivors: baseline and 1-year  
27 determinants of caregiver burden. *Int J Stroke* 2009;4:152–8.  
28  
29  
30  
31  
32 14. Saka O, MCGuire A, Wolfe C. Cost of stroke in the United Kingdom. *Age Ageing*  
33 2009;38:27–32.  
34  
35  
36  
37  
38 15. Gainotti, G, Antonucci G, Marra C, & Paolucci S. Relation between depression after  
39 stroke, antidepressant therapy, and functional recovery. *J Neurol Neurosurg Psychiatry*  
40 2001; 71: 258-261.  
41  
42  
43  
44  
45  
46 16. Pohjasvaara T, Vataja R, Leppavuori A, Kaste M. Depression is an  
47 independent predictor of poor long-term functional outcome poststroke. *Eur J Neurol*  
48 2001;8:315–9  
49  
50  
51  
52  
53  
54  
55  
56  
57  
58  
59  
60

- 1  
2  
3 17. Bartoli F, Lillia N, Lax A, Crocamo C, Mantero V, Carrà G, Agostoni E, Clerici M.  
4  
5 Depression after stroke and risk of mortality: a systematic review and meta-analysis. *Stroke*  
6  
7 *Res Treat* 2013; doi:10.1155/2013/862978.  
8  
9  
10  
11 18. Hackett ML, Anderson CS, House A, Halteh C. Interventions for preventing depression  
12  
13 after stroke. *Cochrane Database of Systematic Reviews* 2008, Issue 3. Art. No.: CD003689.  
14  
15 DOI: 10.1002/14651858.CD003689.pub3.  
16  
17  
18  
19 19. Salter KL, Foley NC, Zhu L, Jutai JW, Teasell RW. Prevention of poststroke depression:  
20  
21 does prophylactic pharmacotherapy work? *J Stroke Cerebrovasc Dis.* 2013 Nov;22(8):1243-  
22  
23 51. doi: 10.1016/j.jstrokecerebrovasdis.2012.03.013. Epub 2012 May 2.  
24  
25 20. Hackett ML, Anderson CS, House A, Xia J. Interventions for treating depression after  
26  
27 stroke. *Cochrane Database of Systematic Reviews* 2008, Issue 4. Art. No.: CD003437. DOI:  
28  
29 10.1002/14651858.CD003437.pub3.  
30  
31  
32  
33 21. Robinson RG, Jorge RE. Post-Stroke Depression: A Review. *Am J Psychiatry* 2016;173:  
34  
35 221–231. <http://doi.org/10.1176/appi.ajp.2015.15030363>  
36  
37  
38  
39 22. Villa RF, Ferrari F, Moretti A. Post-stroke depression: Mechanisms and pharmacological  
40  
41 treatment *Pharmacol Ther.* 2017 Nov 9. pii: S0163-7258(17)30289-9. doi:  
42  
43 10.1016/j.pharmthera.2017.11.005. [Epub ahead of print]  
44  
45  
46  
47 23. Deng L, Sun X, Qiu S, Xiong Y, Li Y, Wang L, Wei Q, Wang D, Liu M. Interventions for  
48  
49 management of post-stroke depression: A Bayesian network meta-analysis of 23  
50  
51 randomized controlled trials. *Sci Rep* 2017;28;7:16466. doi: 10.1038/s41598-017-16663-0.  
52  
53  
54  
55 24. Watkins CL, Auton MF, Deans CF, Dickinson HA, Jack CIA, Lightbody C, et al.  
56  
57 Motivational interviewing early after stroke. A randomized controlled trial.  
58  
59



1  
2  
3 Stroke 2007;38:1004–9.  
4  
5

6  
7 25. Watkins CL, Wathan JV, Leathley MJ, Auton MF, Deans CF, Dickinson HA, et  
8 al. The 12-month effects of early motivational interviewing after acute stroke: a randomized  
9 controlled trial. Stroke 2011;45:1956–61.  
10  
11  
12

13  
14 26. Mitchell PH, Veith RC, Becker KJ, Buzaitis A, Cain KC, Fruin M, et al. Brief  
15 psychosocial-behavioral intervention with antidepressant reduces poststroke  
16 depression significantly more than usual care with antidepressant. Stroke 2009;40:3073–8.  
17  
18  
19  
20

21  
22 27. Thomas SA, Walker MF, Macniven JA, Haworth H, Lincoln NB. Communication  
23 and Low Mood (CALM): a randomized controlled trial of behavioural therapy  
24 for stroke patients with aphasia. Clin Rehabil 2013;27:398–408.  
25  
26  
27  
28

29  
30 28. Thomas SA, Coates E, Das NR et al. Behavioural Activation Therapy for Depression  
31 after Stroke (BEADS): A study protocol for a feasibility randomised controlled pilot trial of a  
32 psychological intervention for post-stroke depression. Pilot Feasibility Stud 2016; 2: 45.  
33  
34  
35  
36

37  
38 29. Lincoln NB, Flannaghan T. Cognitive behavioural psychotherapy for depression  
39 following stroke. Stroke 2003;43:111–5.  
40  
41  
42  
43

44 30. Knapp P, Campbell Burton CA, Holmes J, Murray J, Gillespie D, Lightbody CE, Watkins  
45 CL, Chun HYY, Lewis SR. Interventions for treating anxiety after stroke. Cochrane Database  
46 of Systematic Reviews 2017, Issue 5. Art. No.: CD008860. DOI:  
47  
48 10.1002/14651858.CD008860.pub3.  
49  
50  
51  
52

53  
54 31. Kneebone I. Stepped psychological care after stroke. Disabil Rehabil 2016; 38:1836-  
55 1843.  
56  
57  
58  
59  
60

- 1  
2  
3  
4  
5 32. Harrison MA, Ryan A, Gardiner C. et al. Psychological and emotional needs,  
6  
7 assessment and support post-stroke: a multi-perspective qualitative study. *Top Stroke*  
8  
9 *Rehabil* 2017; 24:119-125.  
10  
11  
12  
13 33. Ellis-Hill C, Payne S, Ward C. Using stroke to explore the life thread model: an  
14  
15 alternative approach to rehabilitation. *Disabil Rehabil* 2008;30:150–9.  
16  
17  
18 34. Gracey F, Evans JJ and Malley D. Capturing process and outcome in complex  
19  
20 rehabilitation interventions: a 'Y-shaped' model. *Neuropsychol Rehabil* 2009; 19: 867-890.  
21  
22  
23  
24 35. Wilson BA, Gracey F, Evans JJ, et al. *Neuropsychological rehabilitation. Theory, models,*  
25  
26 *therapy and outcome.* Cambridge: Cambridge University Press, 2009.  
27  
28  
29  
30 36. Todres L. Being with that: the relevance of embodied understanding for practice. *Qual*  
31  
32 *Health Res* 2008;18:1566–73.  
33  
34  
35  
36 37. Eilertsen G, Kirkevold M, Bjork IT. Recovering from a stroke:a longitudinal, qualitative  
37  
38 study of older Norwegian women. *J Clin Nurs* 2010;19:2004–13.  
39  
40  
41  
42 38. Stickley T, Parr H, Atkinson S, Daykin N, Clift S, De Nora T, Hacking S, Camic PM, Joss  
43  
44 T, White M, Hogan SJ. Arts, health & wellbeing: reflections on a national seminar series and  
45  
46 building a UK research network *Arts & Health* 2017, 9:1, 14-25, DOI:  
47  
48 10.1080/17533015.2016.1166142.  
49  
50  
51  
52 39. All-Party Parliamentary Group on Arts, Health and Wellbeing. (2017). *Creative Health:*  
53  
54 *The Arts for Health and Wellbeing.* Available at:  
55  
56 <http://www.artshealthandwellbeing.org.uk/appg-inquiry>  
57  
58  
59  
60

1  
2  
3  
4  
5 40. Murray M, Gray R. Health psychology and the arts: a conversation. *J Health Psychol*  
6 2008;13:147–53.  
7  
8  
9

10  
11 41. Roe, B. Arts for health initiatives: an emerging international agenda and evidence base  
12 for older populations. *J Adv Nurs* 2014;70: 1–3. doi:10.1111/jan.12216.  
13  
14

15  
16 42. Crone, DM; Sumner, RC; James, DVB. 'Artlift' arts-on-referral intervention in UK primary  
17 care: updated findings from an ongoing observational study *Eur J Public Health* 2018 Feb 16.  
18 doi: 10.1093/eurpub/cky021.  
19  
20  
21  
22

23  
24 43. Boyce, M; Bungay, H; Munn-Giddings, C; Wilson, C. (2017) The impact of the arts in  
25 healthcare on patients and service users: A critical review. *Health Soc Care Community*  
26 2017;1–16. doi: 10.1111/hsc.12502.  
27  
28  
29  
30

31  
32 44. Baumann M, Peck S, Collins C, Eades G. The meaning and value of taking part in a  
33 person-centred arts programme to hospital-based stroke patients: findings from a qualitative  
34 study, *Disabil Rehabil* 2013; 35:3, 244-256, DOI:10.3109/09638288.2012.694574  
35  
36  
37  
38

39  
40 45. Al, K. Gammidge T. Waller D. Fight like a ferret: a novel approach of using art therapy to  
41 reduce anxiety in stroke patients undergoing hospital rehabilitation. *Med Humanit*  
42 2014;40:56-60.  
43  
44  
45  
46

47  
48 46. Kongkasauwan R, Voraakhom K, Pisolayabutra P., et al. Creative art therapy to enhance  
49 rehabilitation for stroke patients: a randomized controlled trial. *Clin Rehabil.* 2016; 30:1016-  
50 1023. Epub 2015 Sep 22.  
51  
52  
53  
54

1  
2  
3 47. Morris J, Kelly C, Toma M., et al. Feasibility study of the effects of art as a creative  
4 engagement intervention during stroke rehabilitation on improvement of psychosocial  
5 outcomes: study protocol for a single blind randomized controlled trial: the ACES study.  
6  
7 Trials 2014;15:380 DOI: 10.1186/1745-6215-15-380.  
8  
9

10  
11  
12 48. White J, Magin P, Attia J. et al. Predictors of health-related quality of life in community-  
13 dwelling stroke survivors: a cohort study. *Fam Pract* 2016 33:382-7. doi:  
14  
15 10.1093/fampra/cmw011. Epub 2016 Mar 15.  
16  
17

18  
19  
20 49. Ellis-Hill C, Gracey F, Thomas S, Lamont-Robinson C, Thomas PW, Marques EMR, et  
21 al.. HeART of Stroke (HoS)', a community-based Arts for Health group intervention to  
22 support self-confidence and psychological well-being following a stroke: protocol for a  
23 randomised controlled feasibility study. *BMJ Open* 2015;5:8 e008888 doi:10.1136/bmjopen-  
24  
25 2015-008888.  
26  
27  
28  
29

30  
31  
32 50. Eldridge, SM, Chan CL, Campbell MJ, Bond CM, Hopewell S, Thabane L, et al.  
33 on behalf of the PAFS consensus group. CONSORT 2010 statement: extension to  
34 randomised pilot and feasibility trials. *BMJ* 2016;355:i5239 [http:// dx.doi.org/10.1136/bmj.](http://dx.doi.org/10.1136/bmj.i5239)  
35  
36 i5239.  
37  
38  
39  
40

41  
42 51. Robinson R, Bolduc P, Price T. Two-year longitudinal study of poststroke mood  
43 disorders: diagnosis and outcome at one and two years. *Stroke* 1987;18:837-  
44  
45 843.10.1080/17533015.2016.1166142.  
46  
47  
48  
49

50 52. Babkair LA. Risk Factors for Poststroke Depression: An Integrative Review. *J Neurosci*  
51  
52 *Nurs.* 2017;49:73-84. doi: 10.1097/JNN.0000000000000271.  
53  
54  
55  
56  
57  
58  
59  
60

- 1  
2  
3 53. Lincoln N, Leadbitter D. Assessment of motor function in stroke patients. *Physiotherapy*  
4 1979;65:48–51.  
5  
6  
7  
8  
9 54. Doosje B, Ellemers N, Spears R. Perceived intragroup variability as a function of group  
10 status and identification. *J Exp Soc Psychol* 1995;31:410–36.  
11  
12  
13  
14 55. Demeurisse G, Demol O, Robaye E. Motor evaluation in vascular hemiplegia. *Eur Neurol*  
15 1980;19:382–9.  
16  
17  
18  
19  
20 56. Goodglass H, Kaplan E, Barresi B. *The Boston Diagnostic Aphasia Examination (BDAE)*.  
21 3rd Edn. Baltimore: Lippincott Williams & Wilkins, 2001.  
22  
23  
24  
25  
26 57. Mioshi E, Dawson K, Mitchell J, et al. The Addenbrooke's Cognitive Examination  
27 Revised: a brief cognitive test battery for dementia screening. *Int J Geriatr Psychiatry*  
28 2006;21:1078–85.  
29  
30  
31  
32  
33  
34 58. Tennant R, Hiller L, Fishwick R, et al. The Warwick-Edinburgh Mental Well-being Scale  
35 (WEMWBS): development and UK validation. *Health Qual Life Out* 2007;16:606–13.  
36  
37  
38  
39  
40 59. Zigmond AS, Snaith RP. The Hospital Anxiety and Depression Scale. *Acta Psychiat*  
41 *Scand* 1983;67:361–70.  
42  
43  
44  
45  
46 60. Al-Janabi H, Flynn TN, Coast J. Development of a self-report measure of capability  
47 wellbeing for adults: the ICECAP-A. *Qual Life Res* 2012;21:167–76.  
48  
49  
50  
51  
52 61. Rosenberg M. *Society and the adolescent self-image*. Princeton, NJ: Princeton  
53 University Press, 1965.  
54  
55  
56  
57  
58  
59  
60

- 1  
2  
3 62. Ware JE, Sherbourne CD. The MOS 36-item Short-Form health survey (SF-36): I.  
4  
5 Conceptual framework and item selection. *Med Care* 1992;30:473–83.  
6  
7  
8  
9 63. Tyerman A, Humphrey M. Changes in self-concept following severe head injury. *Int J*  
10  
11 *Rehabil Res* 1984;7:11–23.  
12  
13  
14 64. Marques, EMR, Johnson EC, Gooberman-Hill R, Blom AW & Noble SM. Resource Use  
15  
16 Logs to Reduce the Amount of Missing Data in Economic Evaluations Alongside Trials.  
17  
18 *Value Health* 2013;16:195-201.  
19  
20  
21  
22 65. Curtis L, Burns A. Unit Costs of Health and Social Care 2015, Personal Social Services  
23  
24 Research Unit, University of Kent, Canterbury. 2015.  
25  
26  
27  
28 66. Department of Health. NHS Reference Costs 2014–2015. National Schedule of  
29  
30 Reference Costs. London: Department of Health; 2015.  
31  
32  
33  
34 67. Office for National statistics. Average weekly earnings dataset. 2015.  
35  
36  
37  
38 68. Lancaster GA, Dodd S, Williamson PR. Design and analysis of pilot studies:  
39  
40 recommendations for good practice. *J Eval Clin Pract* 2004;10:307–12.  
41  
42  
43  
44 69. Lee KI, Thompson SG. The use of random effects models to allow for clustering in  
45  
46 individually randomized trials. *Clin Trials* 2005; 2: 163-173.  
47  
48  
49  
50 70. Flynn TN, Huynh E, Peters TJ, Al-Janabi H, Moody A, Clemens S, Coast J. Scoring the  
51  
52 ICECAP-A capability instrument. Estimation of a UK general population tariff. *Health Econ*  
53  
54 2015;24:258-69. doi: 10.1002/hec.3014. Epub 2013 Nov 20.  
55  
56  
57  
58  
59  
60

- 1  
2  
3 71. Brazier J, Roberts J, Deverill M. The estimation of a preference-based measure of  
4 health from the SF-36. *J Health Econ* 2002; 21: 271-292.  
5  
6  
7  
8  
9 72. Hsieh H-F, Shannon SE. Three Approaches to Qualitative Content Analysis. *Qual Health*  
10 *Res* 2005;15:1277-1288.  
11  
12  
13  
14 73. Braun V, Clarke V. Using thematic analysis in psychology. *Qual Res Psychol* 2006; 3:77-  
15 101.  
16  
17  
18  
19  
20 74. McKenna S, Jones F, Glenfield P, et al. Bridges self-management programme for people  
21 with stroke in the community: a feasibility randomised controlled trial. *Int J Stroke*  
22 2015;10:697-704.  
23  
24  
25  
26  
27  
28 75. Demeyere N, Riddoch MJ, Slavkova ED, Bickerton WL, Humphreys GW. The Oxford  
29 Cognitive Screen (OCS): validation of a stroke-specific short cognitive screening tool.  
30 *Psychol Assess*. 2015;27:883-94. doi: 10.1037/pas0000082. Epub 2015 Mar 2.  
31  
32  
33  
34  
35  
36 76. Stroke Association New Era for Stroke report. Available: [https://www.stroke.org.uk/take-](https://www.stroke.org.uk/take-action/our-campaigns/new-era-stroke)  
37 [action/our-campaigns/new-era-stroke](https://www.stroke.org.uk/take-action/our-campaigns/new-era-stroke) 2016 Last accessed 9 March 2018.  
38  
39  
40  
41  
42

### 43 **Figure Legends:**

44  
45 Figure 1: Consolidated Standards of Reporting Trials (CONSORT) diagram

46  
47 Figure 2: Painting by MDBD

48  
49 Figure 3: Drawing by FB  
50  
51  
52  
53  
54  
55  
56  
57  
58  
59  
60

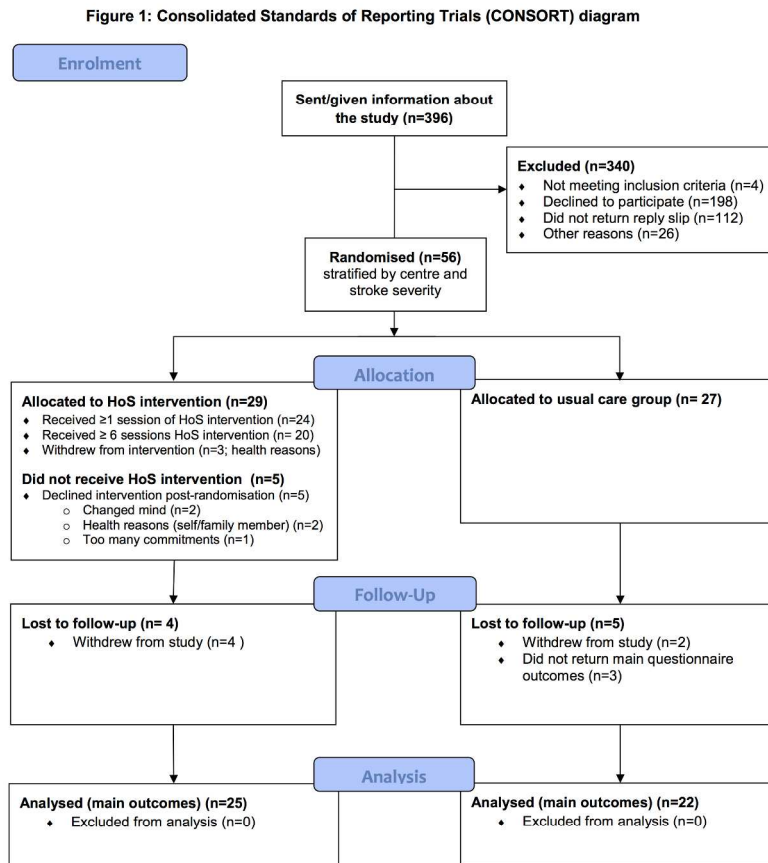

Figure 1: Consolidated Standards of Reporting Trials (CONSORT) diagram

209x297mm (300 x 300 DPI)



1  
2  
3  
4  
5  
6  
7  
8  
9  
10  
11  
12  
13  
14  
15  
16  
17  
18  
19  
20  
21  
22  
23  
24  
25  
26  
27  
28  
29  
30  
31  
32  
33  
34  
35  
36  
37  
38  
39  
40  
41  
42  
43  
44  
45  
46  
47  
48  
49  
50  
51  
52  
53  
54  
55  
56  
57  
58  
59  
60

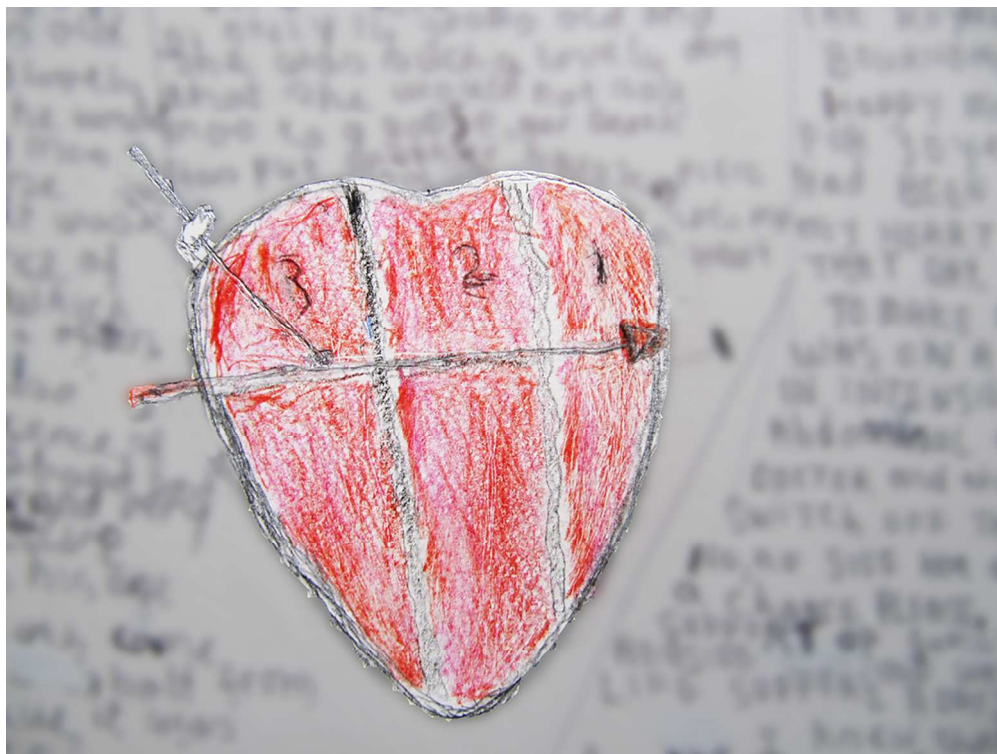

Drawing by FB

169x127mm (300 x 300 DPI)

For peer review only

1  
2  
3  
4  
5  
6  
7  
8  
9  
10  
11  
12  
13  
14  
15  
16  
17  
18  
19  
20  
21  
22  
23  
24  
25  
26  
27  
28  
29  
30  
31  
32  
33  
34  
35  
36  
37  
38  
39  
40  
41  
42  
43  
44  
45  
46  
47  
48  
49  
50  
51  
52  
53  
54  
55  
56  
57  
58  
59  
60

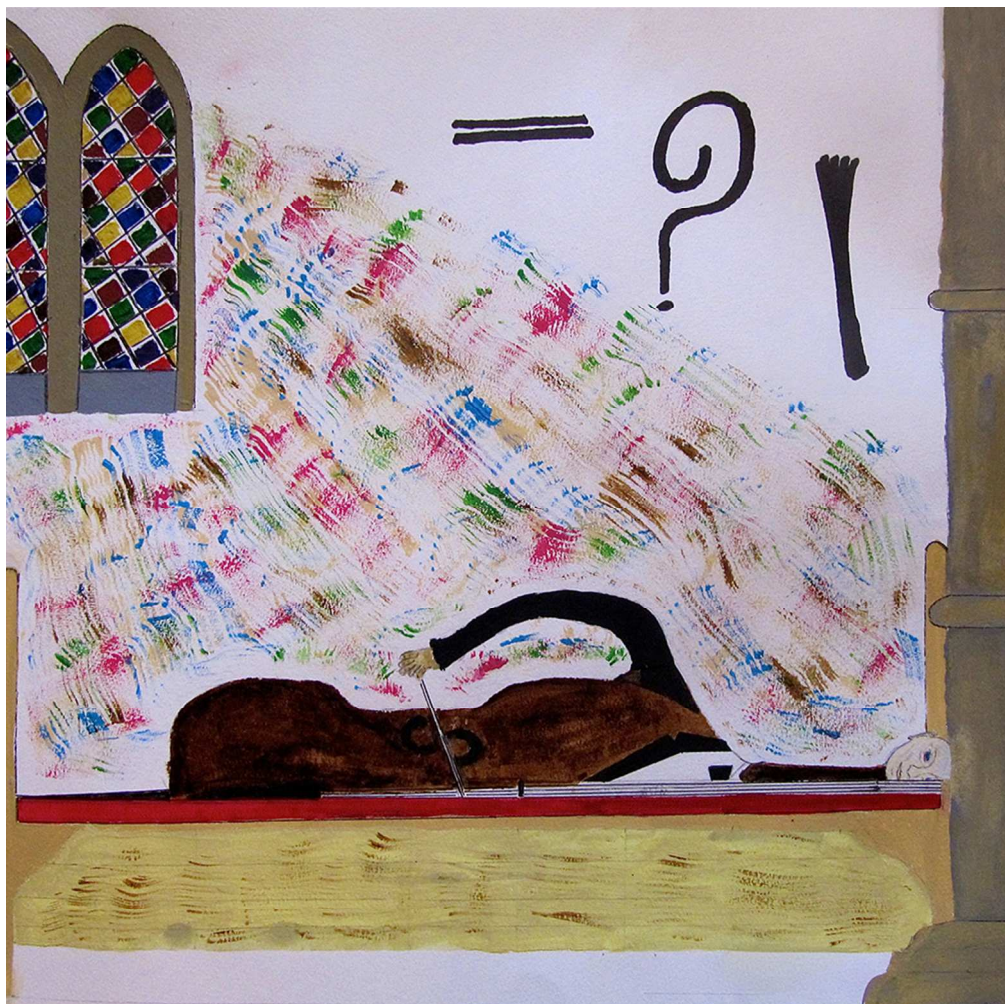

Painting by MDBD

84x84mm (300 x 300 DPI)

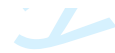

## Supplementary Web tables

Table S1: Attendance at HoS by centre and session

|                                    | Bournemouth |             | Cambridge   |             | Total |
|------------------------------------|-------------|-------------|-------------|-------------|-------|
|                                    | Iteration 1 | Iteration 2 | Iteration 3 | Iteration 4 |       |
| <b>No. randomised to HoS group</b> | 8           | 9           | 6           | 6           | 29    |
| <b>HoS session</b>                 |             |             |             |             |       |
| 1                                  | 6           | 7           | 5           | 4           | 23    |
| 2                                  | 6           | 7           | 5           | 1           | 19    |
| 3                                  | 6           | 6           | 6           | 2           | 20    |
| 4                                  | 6           | 6           | 5           | 2           | 19    |
| 5                                  | 5           | 7           | 5           | 2           | 19    |
| 6                                  | 5           | 6           | 5           | 2           | 18    |
| 7                                  | 6           | 5           | 6           | 3           | 20    |
| 8                                  | 6           | 6           | 4           | 2           | 18    |
| 9                                  | 6           | 6           | 6           | 2           | 20    |
| 10                                 | 6           | 6           | 6           | 3           | 21    |

Table S2: Descriptives for Doojse's et al.'s social identification scale

| Sense of Belonging statement<br><i>(potential score range 1-7, higher scores indicate higher sense of belonging)</i> | Median (IQR) range  |                     |                      |
|----------------------------------------------------------------------------------------------------------------------|---------------------|---------------------|----------------------|
|                                                                                                                      | Session 1<br>(n=24) | Session 5<br>(n=20) | Session 10<br>(n=21) |
| 1. I see myself as a member of the HoS group                                                                         | 6 (2) 1-7           | 7 (1) 4-7           | 7 (0) 6-7            |
| 2. I am pleased to be a member of the HoS group                                                                      | 7 (2) 1-7           | 7 (1) 4-7           | 7 (0) 4-7            |
| 3. I feel strong ties with members of the HoS group                                                                  | 4 (5) 1-7           | 5 (3) 4-7           | 6 (2) 3-7            |
| 4. I identify with other members of the HoS group                                                                    | 5 (3) 1-7           | 6 (2) 4-7           | 7 (1) 4-7            |

**Table S3: Descriptives for potential secondary outcomes**

| Outcome measure                                                                     | Baseline<br>N=56 | Post<br>N=47     |
|-------------------------------------------------------------------------------------|------------------|------------------|
| <b>Rosenberg Self-Esteem Scale (RSES)</b>                                           |                  |                  |
| <i>(potential score range 0-30 , higher scores indicate higher self-esteem)</i>     |                  |                  |
| UC mean (SD) N                                                                      | 20.8 (6.23) 27   | 20.1 (5.21) 22   |
| HoS mean (SD) N                                                                     | 20.4 (5.81) 29   | 21.1 (5.67) 25   |
| <b>Medical Outcomes Short Form-36 (SF-36) - Physical functioning subscale</b>       |                  |                  |
| <i>(potential range 0-100, higher scores more favourable health)</i>                |                  |                  |
| UC mean (SD) N                                                                      | 43.4 (24.51) 27  | 42.7 (23.94) 22  |
| HoS mean (SD) N                                                                     | 48.3 (25.16) 27  | 55.3 (23.23) 23  |
| <b>SF-36 Role limitations - Physical subscale</b>                                   |                  |                  |
| <i>(potential range 0-100, higher scores more favourable health)</i>                |                  |                  |
| UC mean, SD (95% CI)                                                                | 23.9 (29.36) 27  | 17.0 (26.03) 22  |
| HoS mean (SD) N                                                                     | 35.0 (34.61) 28  | 27.0 (38.13) 25  |
| <b>SF-36 Role limitations - Emotional</b>                                           |                  |                  |
| <i>(potential range 0-100, higher scores more favourable health state)</i>          |                  |                  |
| UC mean (SD) N                                                                      | 42.4 (45.05) 27  | 50.0 (42.10) 22  |
| HoS mean (SD) N                                                                     | 45.3 (41.81) 28  | 49.3 (45.26) 25  |
| <b>SF-36 Energy/Fatigue subscale</b>                                                |                  |                  |
| <i>(potential range 0-100, higher scores more favourable health)</i>                |                  |                  |
| UC mean (SD) N                                                                      | 48.6 (18.01) 27  | 42.05 (20.45) 22 |
| HoS mean (SD) N                                                                     | 45.2 (25.5) 27   | 43.3 (25.40) 24  |
| <b>SF-36 Emotional wellbeing subscale</b>                                           |                  |                  |
| <i>(potential range 0-100, higher scores more favourable health)</i>                |                  |                  |
| UC mean SD (N)                                                                      | 68.91 (17.19) 27 | 69.81 (19.51) 22 |
| HoS mean SD (N)                                                                     | 67.33 (17.16) 27 | 68.83 (20.43) 24 |
| <b>SF-36 Social functioning subscale</b>                                            |                  |                  |
| <i>(potential range 0-100, higher scores more favourable health)</i>                |                  |                  |
| UC mean (SD) N                                                                      | 69.3 (26.65) 27  | 64.2 (29.70) 22  |
| HoS mean (SD) N                                                                     | 66.5 (26.45) 28  | 72.00 (28.25) 25 |
| <b>SF-36 Pain subscale</b>                                                          |                  |                  |
| <i>(potential range 0-100, higher scores more favourable health)</i>                |                  |                  |
| UC mean (SD) N                                                                      | 66.8 (24.45) 27  | 71.2 (28.32) 22  |
| HoS mean (SD) N                                                                     | 61.9 (24.97) 27  | 69.5 (27.63) 25  |
| <b>SF-36 General Health subscale</b>                                                |                  |                  |
| <i>(potential range 0-100, higher scores more favourable health)</i>                |                  |                  |
| UC mean SD N                                                                        | 55.2 (23.68) 27  | 55.5 (21.49) 22  |
| HoS mean (SD) N                                                                     | 51.4 (20.09) 27  | 57.3 (19.67) 24  |
| <b>SF-6D Derived health state value</b>                                             |                  |                  |
| <i>(potential range -0.296 to 1.00 with higher scores indicating better health)</i> |                  |                  |
| UC mean (SD) N                                                                      | 0.63 (0.09) 27   | 0.64 (0.08) 21   |
| HoS mean, SD N                                                                      | 0.64 (0.12) 26   | 0.68 (0.12) 24   |

UC = Usual Care

HoS = HeART of Stroke

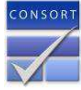

## CONSORT 2010 checklist of information to include when reporting a pilot or feasibility trial\*

| Section/Topic                    | Item No | Checklist item                                                                                                                                                                              | Reported on page No |
|----------------------------------|---------|---------------------------------------------------------------------------------------------------------------------------------------------------------------------------------------------|---------------------|
| <b>Title and abstract</b>        |         |                                                                                                                                                                                             |                     |
|                                  | 1a      | Identification as a pilot or feasibility randomised trial in the title                                                                                                                      | 2                   |
|                                  | 1b      | Structured summary of pilot trial design, methods, results, and conclusions (for specific guidance see CONSORT abstract extension for pilot trials)                                         | 4-5                 |
| <b>Introduction</b>              |         |                                                                                                                                                                                             |                     |
| Background and objectives        | 2a      | Scientific background and explanation of rationale for future definitive trial, and reasons for randomised pilot trial                                                                      | 6-10                |
|                                  | 2b      | Specific objectives or research questions for pilot trial                                                                                                                                   | 13                  |
| <b>Methods</b>                   |         |                                                                                                                                                                                             |                     |
| Trial design                     | 3a      | Description of pilot trial design (such as parallel, factorial) including allocation ratio                                                                                                  | 13                  |
|                                  | 3b      | Important changes to methods after pilot trial commencement (such as eligibility criteria), with reasons                                                                                    | 16, 27              |
| Participants                     | 4a      | Eligibility criteria for participants                                                                                                                                                       | 15                  |
|                                  | 4b      | Settings and locations where the data were collected                                                                                                                                        | 16, 19-20           |
|                                  | 4c      | How participants were identified and consented                                                                                                                                              | 15-17               |
| Interventions                    | 5       | The interventions for each group with sufficient details to allow replication, including how and when they were actually administered                                                       | 17-20               |
| Outcomes                         | 6a      | Completely defined prespecified assessments or measurements to address each pilot trial objective specified in 2b, including how and when they were assessed                                | 20-23               |
|                                  | 6b      | Any changes to pilot trial assessments or measurements after the pilot trial commenced, with reasons                                                                                        | -                   |
|                                  | 6c      | If applicable, prespecified criteria used to judge whether, or how, to proceed with future definitive trial                                                                                 | -                   |
| Sample size                      | 7a      | Rationale for numbers in the pilot trial                                                                                                                                                    | 15                  |
|                                  | 7b      | When applicable, explanation of any interim analyses and stopping guidelines                                                                                                                | -                   |
| Randomisation:                   |         |                                                                                                                                                                                             |                     |
| Sequence generation              | 8a      | Method used to generate the random allocation sequence                                                                                                                                      | 17                  |
|                                  | 8b      | Type of randomisation(s); details of any restriction (such as blocking and block size)                                                                                                      | 17                  |
| Allocation concealment mechanism | 9       | Mechanism used to implement the random allocation sequence (such as sequentially numbered containers), describing any steps taken to conceal the sequence until interventions were assigned | 17                  |
| Implementation                   | 10      | Who generated the random allocation sequence, who enrolled participants, and who assigned participants to                                                                                   | 17                  |

|                                                      |     |                                                                                                                                                                                       |               |
|------------------------------------------------------|-----|---------------------------------------------------------------------------------------------------------------------------------------------------------------------------------------|---------------|
|                                                      |     | interventions                                                                                                                                                                         |               |
| Blinding                                             | 11a | If done, who was blinded after assignment to interventions (for example, participants, care providers, those assessing outcomes) and how                                              | 17,21,24      |
|                                                      | 11b | If relevant, description of the similarity of interventions                                                                                                                           | -             |
| Statistical methods                                  | 12  | Methods used to address each pilot trial objective whether qualitative or quantitative                                                                                                | 24-25         |
| <b>Results</b>                                       |     |                                                                                                                                                                                       |               |
| Participant flow (a diagram is strongly recommended) | 13a | For each group, the numbers of participants who were approached and/or assessed for eligibility, randomly assigned, received intended treatment, and were assessed for each objective | 25 + Figure 1 |
|                                                      | 13b | For each group, losses and exclusions after randomisation, together with reasons                                                                                                      | Figure 1      |
| Recruitment                                          | 14a | Dates defining the periods of recruitment and follow-up                                                                                                                               | 26            |
|                                                      | 14b | Why the pilot trial ended or was stopped                                                                                                                                              | -             |
| Baseline data                                        | 15  | A table showing baseline demographic and clinical characteristics for each group                                                                                                      | 39            |
| Numbers analysed                                     | 16  | For each objective, number of participants (denominator) included in each analysis. If relevant, these numbers should be by randomised group                                          | 41            |
| Outcomes and estimation                              | 17  | For each objective, results including expressions of uncertainty (such as 95% confidence interval) for any estimates. If relevant, these results should be by randomised group        | 41            |
| Ancillary analyses                                   | 18  | Results of any other analyses performed that could be used to inform the future definitive trial                                                                                      | 42-44;72-73   |
| Harms                                                | 19  | All important harms or unintended effects in each group (for specific guidance see CONSORT for harms)                                                                                 | 30            |
|                                                      | 19a | If relevant, other important unintended consequences                                                                                                                                  | -             |
| <b>Discussion</b>                                    |     |                                                                                                                                                                                       |               |
| Limitations                                          | 20  | Pilot trial limitations, addressing sources of potential bias and remaining uncertainty about feasibility                                                                             | 33-35         |
| Generalisability                                     | 21  | Generalisability (applicability) of pilot trial methods and findings to future definitive trial and other studies                                                                     | 33-35         |
| Interpretation                                       | 22  | Interpretation consistent with pilot trial objectives and findings, balancing potential benefits and harms, and considering other relevant evidence                                   | 32-36         |
|                                                      | 22a | Implications for progression from pilot to future definitive trial, including any proposed amendments                                                                                 | 34-35         |
| <b>Other information</b>                             |     |                                                                                                                                                                                       |               |
| Registration                                         | 23  | Registration number for pilot trial and name of trial registry                                                                                                                        | 5             |
| Protocol                                             | 24  | Where the pilot trial protocol can be accessed, if available                                                                                                                          | Referenced    |
| Funding                                              | 25  | Sources of funding and other support (such as supply of drugs), role of funders                                                                                                       | 37            |
|                                                      | 26  | Ethical approval or approval by research review committee, confirmed with reference number                                                                                            | 38            |

Citation: Eldridge SM, Chan CL, Campbell MJ, Bond CM, Hopewell S, Thabane L, et al. CONSORT 2010 statement: extension to randomised pilot and feasibility trials. *BMJ*. 2016;355.\*

# BMJ Open

## HeART of Stroke: Randomised controlled parallel arm feasibility study of a community-based Arts & Health intervention plus usual care compared with usual care to increase psychological wellbeing in people following a stroke.

|                                 |                                                                                                                                                                                                                                                                                                                                                                                                                                                                                                                                                                                                                                                                                                                                                                                                                                                                                                                                                                                                                                                                                                                                                                                       |
|---------------------------------|---------------------------------------------------------------------------------------------------------------------------------------------------------------------------------------------------------------------------------------------------------------------------------------------------------------------------------------------------------------------------------------------------------------------------------------------------------------------------------------------------------------------------------------------------------------------------------------------------------------------------------------------------------------------------------------------------------------------------------------------------------------------------------------------------------------------------------------------------------------------------------------------------------------------------------------------------------------------------------------------------------------------------------------------------------------------------------------------------------------------------------------------------------------------------------------|
| Journal:                        | <i>BMJ Open</i>                                                                                                                                                                                                                                                                                                                                                                                                                                                                                                                                                                                                                                                                                                                                                                                                                                                                                                                                                                                                                                                                                                                                                                       |
| Manuscript ID                   | bmjopen-2017-021098.R2                                                                                                                                                                                                                                                                                                                                                                                                                                                                                                                                                                                                                                                                                                                                                                                                                                                                                                                                                                                                                                                                                                                                                                |
| Article Type:                   | Research                                                                                                                                                                                                                                                                                                                                                                                                                                                                                                                                                                                                                                                                                                                                                                                                                                                                                                                                                                                                                                                                                                                                                                              |
| Date Submitted by the Author:   | 14-Jun-2018                                                                                                                                                                                                                                                                                                                                                                                                                                                                                                                                                                                                                                                                                                                                                                                                                                                                                                                                                                                                                                                                                                                                                                           |
| Complete List of Authors:       | <p>Ellis-Hill, Caroline; Bournemouth University,<br/> Thomas, Sarah; Bournemouth University, Faculty of Health &amp; Social Sciences<br/> Gracey, Fergus; University of East Anglia, Department of Clinical Psychology<br/> Lamont-Robinson, Catherine; University of Bristol, School of Social and Community Medicine<br/> Cant, Robin; Service User, formerly of Canterbury Christ Church University<br/> Marques, Elsa; University of Bristol, School of Social and Community Medicine<br/> Thomas, Peter; Bournemouth University, Faculty of Health and Social Sciences<br/> Grant, Mary; University of Warwick<br/> Nunn, Samantha; Cambridgeshire Community Services NHS Trust, Oliver Zangwill Centre<br/> Paling, Thomas; University of Bristol School of Social and Community Medicine<br/> Thomas, Charlotte; Bournemouth University, School of Health and Social Sciences<br/> Werson, Alessa; University of East Anglia, Department of Clinical Psychology<br/> Galvin, Kathleen; School of Health Sciences<br/> Reynolds, Frances; Brunel University London, College of Health and Life Sciences<br/> Jenkinson, Damian; Dorset County Hospital NHS Foundation Trust</p> |
| <b>Primary Subject Heading</b>: | Health services research                                                                                                                                                                                                                                                                                                                                                                                                                                                                                                                                                                                                                                                                                                                                                                                                                                                                                                                                                                                                                                                                                                                                                              |
| Secondary Subject Heading:      | Neurology                                                                                                                                                                                                                                                                                                                                                                                                                                                                                                                                                                                                                                                                                                                                                                                                                                                                                                                                                                                                                                                                                                                                                                             |
| Keywords:                       | Stroke < NEUROLOGY, Arts & Health, Identity, Wellbeing, Feasibility Study                                                                                                                                                                                                                                                                                                                                                                                                                                                                                                                                                                                                                                                                                                                                                                                                                                                                                                                                                                                                                                                                                                             |
|                                 |                                                                                                                                                                                                                                                                                                                                                                                                                                                                                                                                                                                                                                                                                                                                                                                                                                                                                                                                                                                                                                                                                                                                                                                       |

1  
2  
3  
4  
5  
6  
7  
8  
9  
10  
11  
12  
13  
14  
15  
16  
17  
18  
19  
20  
21  
22  
23  
24  
25  
26  
27  
28  
29  
30  
31  
32  
33  
34  
35  
36  
37  
38  
39  
40  
41  
42  
43  
44  
45  
46  
47  
48  
49  
50  
51  
52  
53  
54  
55  
56  
57  
58  
59  
60

SCHOLARONE™  
Manuscripts

For peer review only



1  
2  
3 **Title:** HeART of Stroke: Randomised controlled parallel arm feasibility study of a community-  
4 based Arts & Health intervention plus usual care compared with usual care to increase  
5 psychological wellbeing in people following a stroke.  
6  
7

8  
9 **Corresponding author:**

10  
11 Caroline Ellis-Hill,\* Faculty of Health and Social Sciences; Bournemouth University,  
12 Bournemouth, UK  
13  
14  
15 cehill@bournemouth.ac.uk  
16  
17

18  
19 **Co-authors:**

20 Sarah Thomas,\* Faculty of Health and Social Sciences, Bournemouth University,  
21 Bournemouth, UK  
22

23  
24 Fergus Gracey, Department of Clinical Psychology, University of East Anglia, Norwich, UK  
25

26 Catherine Lamont-Robinson, School of Social and Community Medicine, University of  
27 Bristol, Bristol, UK  
28

29 Robin Cant, Servicer User, (formerly of Canterbury Christ Church University), Canterbury,  
30 UK  
31

32  
33 Elsa Marques, School of Clinical Sciences, University of Bristol, Bristol, UK  
34

35 Peter Thomas, Faculty of Health and Social Sciences, Bournemouth University,  
36 Bournemouth, UK  
37

38 Mary Grant, Warwick Clinical Trials Unit, University of Warwick, Coventry, UK  
39

40  
41 Samantha Nunn, Cambridgeshire Community Services NHS Trust, Oliver Zangwill Centre,  
42 Ely, UK  
43

44 Thomas Paling, School of Clinical Sciences, University of Bristol, Bristol, UK  
45

46 Charlotte Thomas, Faculty of Health and Social Sciences, Bournemouth University,  
47 Bournemouth, UK  
48

49  
50 Alessa Werson Department of Clinical Psychology, University of East Anglia, Norwich, UK  
51

52 Kathleen Galvin, School of Health Sciences, University of Brighton, Brighton, UK  
53

54 Frances Reynolds, formerly College of Health and Life Sciences, Brunel University London,  
55 Uxbridge, UK  
56  
57

1  
2  
3  
4  
5  
6  
7  
8  
9  
10  
11  
12  
13  
14  
15  
16  
17  
18  
19  
20  
21  
22  
23  
24  
25  
26  
27  
28  
29  
30  
31  
32  
33  
34  
35  
36  
37  
38  
39  
40  
41  
42  
43  
44  
45  
46  
47  
48  
49  
50  
51  
52  
53  
54  
55  
56  
57  
58  
59  
60

Damian Jenkinson, Stroke Unit, Dorset County Hospital, Dorchester UK

\*Joint first authors

**Keywords: stroke, Arts & Health, identity, wellbeing, feasibility study**

**Word count: ~ 7500**

## ABSTRACT

**Introduction** People often experience distress following stroke due to fundamental challenges to their identity.

**Objectives** Evaluate: (i) the acceptability of 'HeART of Stroke' (HoS), a community-based Arts & Health group intervention, to increase psychological wellbeing; (ii) the feasibility of a definitive randomised controlled trial (RCT).

**Design** Two-centre 24-month parallel arm RCT with qualitative and economic components. Randomisation stratified by centre and stroke severity. Participant blinding was not possible. Outcome assessment blinding attempted.

**Setting** Community

**Participants** Community-dwelling adults  $\leq 2$  years post-stroke, recruited via hospital clinical teams/databases or community stroke/rehabilitation teams.

**Interventions** Artist-facilitated Arts & Health group intervention (HoS) (ten 2-hour sessions over 14 weeks) plus usual care (UC) versus UC.

**Outcomes** Self-reported measures of wellbeing, mood, capability, health-related quality of life, self-esteem and self-concept (baseline and five months post-randomisation). Key feasibility parameters were gathered, data collection methods piloted and participant interviews (n=24) explored acceptability of the intervention/study processes.

**Results** Despite a low recruitment rate (14%; 95% CI: 11% to 18%), 88% of the recruitment target was met with 29 participants randomised to HoS and 27 to UC (57% male; mean [SD] age = 70 [12.1] years; time-since-stroke = 9 [6.1] months). Follow-up data were available for 47/56 (84%; 95% CI: 72% to 91%). Completion rates for a study-specific resource use questionnaire were 79% and 68% (NHS and societal perspectives). Five people declined HoS post-randomisation; of the remaining 24 who attended, 83% attended  $\geq 6$  sessions.

1  
2  
3 Preliminary effect sizes for candidate primary outcomes were in the direction of benefit for  
4 the HoS arm. Participants found study processes acceptable. The intervention cost an  
5 estimated £456 per person and was well-received (no intervention-related serious adverse  
6 events reported).  
7  
8  
9

10  
11 **Conclusions** Findings from this first community-based study of an Arts & Health intervention  
12 for people post-stroke suggest a definitive RCT is feasible. Recruitment methods will be  
13 revised.  
14  
15

16  
17  
18 ISRCTN 99728983  
19  
20

### 21 ***Strengths and limitations of this study***

- 22  
23 • This is the first feasibility study of a community-based Arts & Health group  
24 intervention to support wellbeing following a stroke.  
25
- 26 • Participants were recruited via both hospital and community clinical teams enabling  
27 recruitment rate estimates for two different recruitment approaches.  
28
- 29 • The study incorporated mixed methods and a feasibility economic component.  
30
- 31 • The study only included short term follow-up.  
32
- 33 • Findings will inform a definitive randomised controlled trial of effectiveness and cost-  
34 effectiveness.  
35  
36  
37  
38  
39  
40  
41  
42  
43  
44  
45  
46  
47  
48  
49  
50  
51  
52  
53  
54  
55  
56  
57  
58  
59  
60

## INTRODUCTION

Each year over 150,000 people in the UK experience a stroke<sup>1</sup> with one-third left with residual disabilities including paralysis on one side and cognitive and communication impairments.<sup>2</sup> Qualitative meta-syntheses have highlighted that following a stroke, or other types of brain injury, people face fundamental emotional and existential challenges. They experience challenges to their sense of self and identity and their current and future lives are filled with uncertainty.<sup>3,4</sup> Emotional health and wellbeing following stroke have been highlighted as national priorities, featuring in the James Lind Alliance 'top ten' research priorities.<sup>5</sup>

Following a stroke people report a need to 'get their lives back'. Failure to do so is associated with depression<sup>6,7</sup> (with reported accumulative incidence of 39–52% within 5 years of stroke<sup>7</sup>), loss of confidence,<sup>8</sup> people having difficulty in 'feeling part of things',<sup>9</sup> loss of sense of self<sup>10</sup> and becoming socially isolated.<sup>11</sup> This creates long-term costs, not only for the stroke survivor, but also for their family members,<sup>12,13</sup> and for government, health and social services through reduced family employment and increased social and primary care needs.<sup>14</sup> Where untreated, depression is associated with poorer functional outcomes<sup>15</sup> and higher mortality.<sup>16,17</sup>

While there have been great improvements in stroke care, the stroke pathway for long-term support is still under-researched and under-developed. A Cochrane review indicated no evidence for pharmacotherapy in the prevention of post-stroke depression, and only weak evidence for psychotherapeutic approaches.<sup>18</sup> A more recent systematic review<sup>19</sup> that limited inclusion to participants without a diagnosis of depression at baseline concluded that antidepressants may reduce the likelihood of depression developing post-stroke but that the optimum timing and duration of treatment was not clear. There is also evidence to suggest that pharmacological treatments can have modest benefits in the treatment of depression

1  
2  
3 post-stroke.<sup>20-23</sup> However, anti-depressants have side effects and may have undesirable  
4 interactions with other medications and/or comorbidities.<sup>20-23</sup>  
5  
6  
7

8  
9 While the evidence for the effectiveness of psychotherapeutic interventions for post-stroke  
10 depression is inconclusive,<sup>20</sup> two recent RCTs (motivational interviewing<sup>24,25</sup> and a brief  
11 psychosocial behavioural intervention plus anti-depressant<sup>26</sup>) demonstrated reductions in  
12 post-stroke depression. However, these trials involved people early after stroke and  
13 excluded those with severe communication or cognitive problems. The CALM  
14 (Communication and Low Mood) trial<sup>27</sup> of behavioural therapy demonstrated improved mood  
15 in stroke patients with aphasia and a feasibility study of behavioural activation is now  
16 underway using a broader sample of people with depression 3-60 months post-stroke.<sup>28</sup> A  
17 study of cognitive behavioural therapy for post-stroke depression demonstrated no benefits  
18 over usual care or an attention control; however, the sample size was small.<sup>29</sup>  
19  
20  
21  
22  
23  
24  
25  
26  
27  
28  
29  
30

31 Around 20% of people experience clinical levels of anxiety following stroke.<sup>30</sup> A recent  
32 Cochrane review highlighted the need for further rigorously conducted RCTs to assess  
33 pharmacological and psychological treatments for anxiety following stroke.<sup>30</sup>  
34  
35  
36  
37  
38

39 A stepped approach to psychological support following stroke has been proposed in the UK  
40  
41 <sup>31</sup> (Step 1: awareness, watching; Step 2: low intensity services, such as guided self-help;  
42 Step 3: high intensity services, such as cognitive behavioural therapy (CBT)) but this system  
43 is still in its infancy.  
44  
45  
46  
47  
48

49 Harrison et al. (2017)<sup>32</sup> concluded from qualitative research with service users that research  
50 is needed to test alternative options to formal psychological support. Ellis-Hill et al.<sup>33</sup> and  
51 Gracey et al.<sup>34</sup> have independently developed complementary theoretical models based on  
52 empirical evidence to understand the processes involved in re-establishing a positive sense  
53  
54  
55  
56  
57  
58  
59  
60

1  
2  
3 of self and confidence in life following a stroke. The current research draws upon two  
4 specific and related theoretical frameworks; namely, the Life Thread Model<sup>33</sup> and Self-  
5 discrepancy theory.<sup>9,34</sup> These highlight that following an acquired brain injury people often  
6 lose a sense of coherence of self and a sense of predictability in life. These existential  
7 losses can cause considerable anxiety and can lead to depression. Within  
8 neuropsychological rehabilitation, it is hypothesised that establishing a safe place where  
9 clients feel understood and supported can facilitate self-development.<sup>34,35</sup> When carrying out  
10 embodied creative activities (such as art), people can reconnect their past, present and  
11 future selves, recreating meaningful narratives in their lives, and new ways of 'being in the  
12 world',<sup>36,37</sup> leading to improvements in mood and self-confidence.

23  
24 There is increasing recognition of the importance of creative approaches in health provision;  
25 for example, in the UK we have seen the launch of a national Special Interest Group for Arts,  
26 Health and Wellbeing supported by the Royal Society for Public Health<sup>38</sup> and the All-Party  
27 Parliamentary Group (APPG) inquiry into Arts, Health and Well-being in the UK.<sup>39</sup> Practical  
28 creative approaches offer new ways to explore experiences, especially those which are  
29 difficult to put into words.<sup>40</sup> There is a growing body of evidence that art-based practices are  
30 of great benefit in supporting psychological and social recovery in health services<sup>39</sup> and an  
31 emerging international agenda for 'Arts for Health' initiatives.<sup>41</sup> An ongoing prospective  
32 observational study (2009-2016) of patients referred to an 8 or 10 week 'arts on referral'  
33 programme in UK general practice (n = 1297) found statistically significant improvements in  
34 wellbeing in those who completed their prescribed programme.<sup>42</sup> Boyce et al.'s (2017)<sup>43</sup>  
35 critical review of the value of arts in healthcare highlighted that although findings are  
36 promising, research to date has been relatively narrow both in scope (a focus on music) and  
37 methodological approach. They called for methodologically rigorous research that considers  
38 different art forms in a variety of healthcare settings and considers cost-effectiveness.

1  
2  
3 In stroke, initial findings from exploratory studies of the effect of art on mood have been  
4 promising.<sup>44,45</sup> To our knowledge, there are only two other RCTs of Arts and Health  
5 interventions in stroke, both of which took place in inpatient rehabilitation settings.<sup>46,47</sup>  
6  
7 Konkasuwan's 2015 study in Thailand involved 118 stroke patients and compared 'creative  
8 art therapy' plus standard physiotherapy with physiotherapy only.<sup>46</sup> The creative art therapy  
9 was delivered by art therapists twice a week over 4 weeks and included music, singing and  
10 meditation in addition to the creative art therapy activities. They found improvements  
11 favouring the intervention group post-treatment in measures of mood, cognition, physical  
12 functioning and quality of life. Morris et al.'s<sup>47,48</sup> United Kingdom randomised controlled  
13 feasibility study (n=81) compared an artist-delivered visual arts participation programme (up  
14 to 8 sessions including individual and group delivery formats) with usual care. They  
15 concluded that the intervention was feasible to deliver and appeared to offer promise in the  
16 domains of emotional wellbeing and self-efficacy.  
17  
18  
19  
20  
21  
22  
23  
24  
25  
26  
27  
28  
29  
30

31 White et al. (2016)<sup>49</sup> highlighted that community participation and stroke-related disability are  
32 potentially modifiable risk factors affecting post-stroke health-related quality of life and that  
33 interventions addressing these factors should be developed and tested. This feasibility  
34 study<sup>50</sup> is the first to begin to systematically test an Arts & Health intervention ('HeART of  
35 Stroke') for people post-stroke in a community setting.  
36  
37  
38  
39  
40  
41  
42

## 43 **METHODS**

### 44 **Ethical approvals**

45  
46 The study was reviewed and given a favourable opinion by the Exeter NHS REC (Ref:  
47 13/SW/0136). Local Research and Development approval was granted by the Royal  
48 Bournemouth and Christchurch Hospitals (RBCH) NHS Foundation Trust (the study  
49 sponsor) and by Cambridgeshire Community Services NHS Trust.  
50  
51  
52  
53  
54  
55  
56  
57  
58  
59  
60



## Aims and objectives

The aims of the feasibility study were, firstly, to assess the acceptability of a 10-session community Arts & Health group intervention ('HeART of Stroke') for people following stroke and, secondly, to evaluate the feasibility of conducting a definitive randomised controlled trial to test its effectiveness and cost effectiveness when added to usual care. The specific objectives were to:

1. Assess the acceptability of key aspects of study design, randomisation and recruitment processes, and of the HoS group intervention.
2. Estimate recruitment and short-term retention rates.
3. Estimate HoS group attendance rates.
4. Assess the suitability of the outcome measures and feasibility of the assessment strategy.
5. Refine the selection of the outcome measures; in particular, to help inform the selection of the primary outcome for the full scale RCT.
6. Explore, qualitatively, individuals' experiences of participating in the study and gather feedback about the intervention and outcome measures.
7. Collect data on the standard deviation of outcome measures to inform a sample size calculation for a larger trial and obtain a preliminary estimate of effect size.
8. Refine the HoS group intervention and its delivery.
9. Explore differences in processes between the two study centres.
10. Identify, measure and value resources required to deliver the intervention in the community.
11. Develop and pilot data collection tools to measure resource use in the follow-up period to inform the design of a future within-trial economic evaluation, and estimate the cost of delivering HoS.

## Study design

1  
2  
3 A two centre parallel arm randomised controlled feasibility study comparing the HoS group  
4 intervention plus usual care versus usual care alone (1:1 allocation ratio), with nested  
5 economic and qualitative components.  
6  
7  
8  
9

10 For reasons of efficiency and expediency, the end point of this feasibility study was one  
11 month post-intervention, but a definitive trial would include up to 12 months follow-up post-  
12 intervention to capture the longer term health and economic impact of the HoS intervention.  
13  
14 One month post-treatment was chosen as the study end point rather than end of treatment  
15 because i. some of the outcome measures include items with 4-week recall periods (e.g. the  
16 SF-36) and ii. to reduce the likelihood of capturing transient disappointment about the group  
17 coming to an end in those who attended a HoS group.  
18  
19  
20  
21  
22  
23  
24  
25

### 26 **Patient and public involvement**

27  
28 Patient and public involvement members were involved in the initiation and design of the  
29 study, the development of the funding application, the design of the HoS intervention, the  
30 selection of relevant outcome measures and the design of study materials. During the  
31 research, as well as having RC, a grant holder, who attended all steering group and  
32 dissemination meetings, we formed PPI groups in each centre. There were five patient and  
33 public involvement members in Bournemouth (four involved in the study at any one time).  
34  
35 Members came from the local voluntary 'Different Strokes' group, the Royal Bournemouth  
36 and Christchurch Hospitals NHS Foundation Trust stroke ward patient and public  
37 involvement group and via word of mouth from these members. Four members were several  
38 years following their stroke and one person was a caregiver. There were three patient and  
39 public involvement members in Cambridgeshire; one was identified through a previous  
40 research role, two were identified through community organisations (Stroke Association and  
41 NHS community services). All were several years post-stroke.  
42  
43  
44  
45  
46  
47  
48  
49  
50  
51  
52  
53  
54  
55  
56  
57  
58  
59  
60

1  
2  
3 As planned, patient and public involvement members were involved in three of the five study  
4 management group meetings. A newsletter kept patient and public involvement members  
5 updated with study progress. Members contributed to the study in many ways, including  
6 providing feedback about outcome measures, providing opportunities for the researchers to  
7 run through/practise aspects of the study protocol, helping to identify a suitable venue for the  
8 intervention, providing ideas on how to enhance recruitment, contributing to plain English  
9 summaries, supporting the exhibition of artwork and other dissemination activities.  
10  
11 Examples of dissemination activities undertaken include a workshop at the UK Stroke Forum  
12 co-delivered by a study participant with two members of the research team (CLR and CEH),  
13 local newspaper coverage and articles in magazines.  
14  
15  
16  
17  
18  
19  
20  
21  
22  
23  
24

## 25 **Methods**

26 Details of our methods are published in our protocol paper.<sup>50</sup> We aimed to recruit a sample  
27 of 64 people (32 per centre in two blocks of 16). This would have provided an estimate of the  
28 recruitment rate with a precision of  $\pm 6\%$  (assuming a recruitment rate of 30%) and a  
29 questionnaire return rate with a precision of  $\pm 10\%$  (assuming a questionnaire return rate of  
30 80%). Reporting of this feasibility study follows the CONSORT 2010 extension for  
31 randomised pilot and feasibility trials.<sup>51</sup>  
32  
33  
34  
35  
36  
37  
38  
39  
40

## 41 **Participants**

42 Participants were adults living in the community up to two years post-stroke. This time point  
43 was chosen as the peak incidence and greatest severity of depression commonly occurs  
44 between 6 months and 2 years following stroke.<sup>52</sup> Participants also had physical or cognitive  
45 symptoms from stroke at five days post-stroke. Severity of stroke and cognitive impairment  
46 are risk factors for the development of post-stroke depression.<sup>53</sup> People who have fully  
47 recovered physically and cognitively within this short time point may be less likely to benefit  
48 from the intervention. Exclusion criteria included severe receptive aphasia, cognitive levels  
49 that would preclude completion of outcome measures even with support, currently receiving  
50  
51  
52  
53  
54  
55  
56  
57  
58  
59  
60

1  
2  
3 a psychiatric or clinical psychology intervention, living in a residential or nursing home,  
4 requiring assistance with toilet needs (because the Arts & Health practitioners were not  
5 trained to support transfers).  
6  
7  
8  
9

## 10 **Identification, screening and recruitment**

### 11 ***Bournemouth Centre, UK (Royal Bournemouth and Christchurch Hospitals (RBCH)***

#### 12 ***NHS Foundation Trust)***

13 Potential participants, identified by clinical research network staff at RBCH NHS Foundation  
14 Trust, were either sent or given an invitation letter, 'Key Facts' page and reply slip and asked  
15 to return a prepaid reply slip if they were interested in participating. The study research  
16 assistant contacted those who expressed an interest and answered any queries or questions  
17 (via telephone, or face-to-face if the person had a communication disability). If they were still  
18 interested in taking part, they were sent or given a set of participant information sheets.  
19  
20  
21  
22  
23  
24  
25  
26  
27  
28  
29

30 In an attempt to improve recruitment we revised the invitation and reminder letters partway  
31 through the study via an approved substantial amendment to the NHS REC. Our patient and  
32 public involvement partners and clinical colleagues in the stroke research team at RBCH  
33 provided feedback to enhance the appeal and readability of the information via a more  
34 accessible and engaging style.  
35  
36  
37  
38  
39  
40  
41

### 42 ***Cambridgeshire Centre, UK (Cambridgeshire Community Services NHS Trust)***

43 Clinical staff from the community stroke and neuro-rehabilitation teams identified potential  
44 participants in the community. In addition to the invitation letter described above, a 'consent  
45 to contact' approach was used whereby consent to be contacted by the Cambridgeshire  
46 centre research assistant was sought. A member of the clinical team obtained this consent  
47 during a face-to-face consultation or verbally over the phone. If the individual remained  
48 interested, the research assistant gave/sent them a set of participant information sheets.  
49  
50  
51  
52  
53  
54  
55  
56  
57  
58  
59  
60

### **Informed consent process**

For individuals interested in taking part, the local research assistant arranged to visit the person at home within one month prior to the start of the HoS group. This provided an opportunity to answer any remaining questions the individual had about the study. If the person still fulfilled the eligibility criteria (a screening checklist was used) and still wished to take part, they were asked to complete and sign a consent form and complete the baseline assessment.

### **Randomisation**

The web-based randomisation system was created by the Peninsula Clinical Trials Unit in conjunction with the study statistician. Participants were allocated to the HoS intervention plus usual care or usual care in a 1:1 ratio using minimisation to balance the numbers allocated to each arm with stratification by recruitment centre and stroke severity (Rivermead Motor Assessment – Gross Motor Subscale score  $\leq 6$  ('mild') vs.  $\geq 7$  ('moderate/severe')).<sup>54</sup> The study research assistants in each centre logged onto the system using a unique username and password. They were able to randomise participants individually or in batches. Randomisation of individuals was used to 'top up' the two trial arms if any further participants were recruited before the HoS intervention groups started.

### **Blinding**

The nature of the intervention meant that it was not possible to blind participants and artist facilitators to group allocation. At follow-up, when support was provided/required to complete outcome measures this was provided by assessors blind to group allocation.

### **HeART of Stroke (HoS) group intervention**

The HoS intervention is described in detail in the published protocol.<sup>50</sup> In summary, it comprised ten two hour Arts & Health practitioner-led group sessions held in community

1  
2  
3 venues over 14 weeks. Sessions were held in the mornings (10.30-12.30) with a  
4 refreshment break. Sessions 1-3 included introductions and initial exploration. During  
5 sessions 4-7 participants were encouraged to develop their own creative practice within the  
6 sessions and at home. In sessions 8-10 links with local Arts & Health practitioners were  
7 made and potential plans for an exhibition of the participants' work discussed.  
8  
9  
10  
11  
12  
13

14 Key aspects of the group were the opportunity to be creative and the safe group  
15 atmosphere. At each group, the Arts & Health practitioners encouraged members to a)  
16 explore the materials provided and arts techniques shared; b) explore their senses and  
17 support others' explorations; b) be non-judgmental of self/others; c) follow and respond to  
18 their own interests and d) develop a sense of play/improvisation. The Arts & Health  
19 practitioners prepared resources (including paints, drawing materials, clay, textiles and  
20 mixed-media) in response to the group members' individual and collective creative interests  
21 and skills. The group was offered 'stimulus' pieces such as books, poems, images, music  
22 and film and members were encouraged to share their own pieces of interest with the group.  
23 Examples of artwork produced can be seen at the beginning of the paper (Figure 1) and  
24 below (Figure 2).  
25  
26  
27  
28  
29  
30  
31  
32  
33  
34  
35  
36  
37

38 Following each session, the Arts & Health practitioner briefly documented observations and  
39 reflected further to inform the selection of materials and activity for the next session.  
40 Practitioners also provided participants with sketchbooks and/or paper and other arts  
41 materials to support their emerging interests between sessions.  
42  
43  
44  
45  
46  
47

48 The rationale of HoS is to provide a safe space through the medium of the Arts in which  
49 group members have the opportunity to reconnect with their internal selves through their  
50 senses and embodied knowing and connect with, and support, others. This was a face-to-  
51 face group intervention, with self-directed individual art activity opportunities between  
52 meetings. Standardisation was linked with the context and setting rather than specified  
53  
54  
55  
56  
57  
58  
59  
60

1  
2  
3 activities carried out by the practitioners and participants as this was expected to vary due to  
4 the creative nature of the activity. For example, standardisation included the groups taking  
5 place in a non-medical setting, so that the Arts & Health practitioners could create and hold a  
6 safe space in which participants felt able to express themselves creatively. The focus was  
7 the person not their stroke. The artists responded to and followed the interests of each  
8 participant, rather than solely 'teaching' arts skills.  
9  
10  
11  
12  
13

### 14 15 16 *Facilitators and venues*

17  
18 The groups were facilitated by Arts & Health practitioners, with at least 5 years' Arts & Health  
19 practice experience, who were able to support groups, create and hold a safe space, and  
20 who were willing and able to support arts practice where participants took the lead in their  
21 own discovery and exploration. Currently in the UK, Arts & Health practitioners are not  
22 required to undertake specific training but characteristically develop their practice within NHS  
23 initiatives working alongside experienced artist mentors or with respected 'Arts on  
24 Prescription' organisations. One Arts & Health practitioner led both groups in Bournemouth  
25 (CLR) and two led one group each in Cambridgeshire. They had access to expertise in  
26 stroke (CEH) and clinical psychology (FG). For the purposes of the project a researcher was  
27 also present on site, if needed. The researcher supported study administration aspects (such  
28 as travel expenses for participants) and participant completion of a scale (Doojse et al.'s  
29 social identification scale) assessing group fit/belonging.<sup>55</sup>  
30  
31  
32  
33  
34  
35  
36  
37  
38  
39  
40  
41  
42  
43

44 In Bournemouth the HoS groups (iterations 1 & 2) were held in a church hall and in  
45 Cambridgeshire they were held either in a room in a community hospital site on the edge of  
46 Cambridge city used by Headway Cambridgeshire (a local brain injury charity) (iteration 3) or  
47 a community centre in a very rural north Cambridgeshire town (iteration 4). All venues had  
48 disabled access/toilet facilities, access to water and a sink, tea/coffee-making facilities and  
49 could accommodate up to eight participants (potentially with wheelchairs) around a table.  
50  
51  
52  
53  
54  
55  
56  
57  
58  
59  
60

1  
2  
3 There were storage facilities (albeit limited) in Cambridgeshire but none in the Bournemouth  
4 venue. Transport was provided for those unable to make their own way to the venue.  
5  
6  
7

### 8 *Usual Care*

9  
10 In Bournemouth, support is provided by the Early Supported Discharge multidisciplinary  
11 team for 2–6 weeks after leaving hospital and then medical care via the General Practitioner  
12 (GP), with a referral to the Stroke Coordinator. People with complex medical conditions are  
13 seen by Stroke Consultants as hospital outpatients. Ongoing rehabilitation needs are met by  
14 rehabilitation teams and day hospital service provision in some areas. In Cambridgeshire,  
15 medical care is delivered via the GP and people with complex medical conditions are seen  
16 by Stroke Consultants as hospital outpatients. All can access support from the Stroke  
17 Association 'Information, Advice and Support Coordinator' and may receive additional  
18 therapy or support via one of three locality neurorehabilitation teams. Participants in both  
19 arms of the trial received usual care, and usual care was not affected by involvement in the  
20 trial.  
21  
22  
23  
24  
25  
26  
27  
28  
29  
30  
31  
32  
33

### 34 **Descriptors and proposed outcome measures**

#### 35 *Demographic/descriptor variables and stroke related information*

36  
37 At baseline the local research assistant collected information during a home visit about age,  
38 sex, marital status, educational qualifications, ethnicity, household composition, employment  
39 situation, comorbidities, medication, type of stroke, stroke side, time-since-stroke, mobility  
40 (Rivermead Assessment - Gross Motor subscale),<sup>54</sup> upper limb impairment (Motricity  
41 Index),<sup>56</sup> communication ability (Boston Severity Rating Scale),<sup>57</sup> and cognitive ability  
42 (Addenbrookes Cognitive Exam – Revised; ACE-R).<sup>58</sup>  
43  
44  
45  
46  
47  
48  
49  
50  
51

#### 52 *Outcome measures*

53  
54 The outcome measures (see below) were self-reported and presented in a booklet in a large  
55 font (pt. 14). At baseline, outcome measures were administered face-to-face by a research  
56  
57  
58  
59  
60



1  
2  
3 assistant in participants' homes. At approximately 5 months post-randomisation (1 month  
4 post - HoS intervention) outcome measures were administered by post, or if needed, with  
5 face-to-face or telephone support from a blinded assessor (one in each centre). At the end of  
6 the questionnaire booklet there was a question that asked whether participants had received  
7 any support from others to complete it with the following response options possible: none,  
8 researcher on phone, researcher at house, family member/friend. Participants were asked  
9 not to disclose their allocation arm to the blinded assessors. In each centre the blinded  
10 assessors were asked to guess participants' treatment allocation.  
11  
12  
13  
14  
15  
16  
17  
18  
19  
20

21 In line with the feasibility objectives of this study, three outcome measures were included for  
22 consideration as potential candidates for the primary outcome in a subsequent full trial, as  
23 follows:  
24

- 25 (i) Warwick and Edinburgh Mental Wellbeing Scale (WEMWBS)<sup>59</sup>
- 26 (ii) Hospital Anxiety and Depression Scale (HADS)<sup>60</sup>
- 27 (iii) ICEpop CAPability measure for adults (ICECAP-A)<sup>61</sup>

28  
29  
30  
31  
32  
33  
34 In addition, the following outcome measures were included as potential secondary  
35 outcomes:  
36

- 37 (i) Rosenberg Self-Esteem Scale (RSES)<sup>62</sup>
- 38 (ii) Medical Outcomes Short Form-36 (SF-36 V.1)<sup>63</sup>
- 39 (iii) Head Injury Semantic Differential Scale (HISDS-III)<sup>64</sup>

#### 40 41 42 43 44 45 46 *Serious adverse events and adverse events*

47 Serious adverse events (SAEs) and adverse events (AEs) were closely monitored,  
48 documented and reported as described in the study protocol.<sup>50</sup>  
49  
50  
51

#### 52 53 54 *Process measures*

1  
2  
3 Doojse et al.'s social identification self-report scale<sup>55</sup> was used to measure 'sense of  
4 belonging' by participants in the HoS group at the end of the first, fifth and final session.  
5  
6  
7

### 8 *Identifying, measuring and valuing resource use*

9

10 Resources required to deliver the HoS intervention were recorded for each session on forms  
11 completed by the artist facilitators. These included artists' preparation time, travel time to  
12 and from the venue, time spent delivering the intervention, equipment and materials used,  
13 number of participants attending the sessions, venue and venue hire costs. Resources were  
14 valued using local estimates provided by the experienced artists delivering HoS. Artist  
15 facilitators' time was valued at the fixed fee of £120 per session (to cover travel, preparation  
16 and delivery costs) with an additional £25 fee for materials and £8 for refreshments. Venue  
17 hire costs in Bournemouth (iterations 1 & 2) were £40 per session, and in Cambridgeshire,  
18 £100 per session (iteration 3) and £25 per session (iteration 4). We envisage the roll-out of  
19 the HoS intervention would follow a similar model whereby the health care provider would  
20 pay the artist facilitators a fixed delivery fee. Participant travel costs to attend sessions were  
21 recorded and are reported.  
22  
23  
24  
25  
26  
27  
28  
29  
30  
31  
32  
33  
34  
35

36 Resources required to deliver usual care in both arms were collected via a bespoke  
37 telephone-administered resource use questionnaire that asked about resources used in the  
38 period following randomisation. Participants were posted the questionnaire in advance of the  
39 telephone interview and were offered face-to-face support to complete it, if required. The  
40 questionnaire included hospital visits and admissions, use of community and social services,  
41 time off work and social activities, informal care, other sources of support, expenses incurred  
42 and medications. As service users advised us that it would be difficult to distinguish between  
43 stroke-related resource use and resource use related to co-morbidities, the questionnaire  
44 asked respondents to report resources related to all their health care needs. We assume  
45 that, in a definitive RCT, any differences between arms would result from the HoS  
46 intervention effect. To improve completion rates,<sup>65</sup> participants were provided with a  
47  
48  
49  
50  
51  
52  
53  
54  
55  
56  
57  
58  
59  
60

1  
2  
3 resource use log to record health care visits prospectively, if they wished. Resources were  
4 valued using Curtis and Burns' Unit Costs of Health and Social Care<sup>66</sup> and the 2015  
5 Department of Health National Health Service (NHS) reference costs.<sup>67</sup> Private expenses  
6 were self-reported. Hours of informal care and time off work and social activities were valued  
7 using the Office for National Statistics (2015) average weekly earnings.<sup>68</sup>  
8  
9  
10  
11  
12  
13

### 14 *Qualitative descriptive interviews*

15  
16 Face-to-face interviews with twelve people (8 intervention; 4 usual care) were undertaken in  
17 people's homes across both centres by CEH on two occasions: i. post-randomisation but  
18 before the HoS intervention was delivered; and ii. at study end after all outcome measures  
19 had been completed. Purposive sampling was used to capture variations that might  
20 influence perceptions including age, sex, communication disability and severity of stroke.  
21  
22 The pre-intervention topics included why the person decided to take part in the overall study,  
23 their views on the recruitment and initial assessment process, and (intervention group only)  
24 expectations in terms of the HoS group intervention. The post-intervention topics included  
25 views on the study and outcome assessment processes and the acceptability of completing  
26 outcomes at one year follow-up in the context of a hypothetical future trial. Intervention  
27 participants were also asked about their experiences of the group, the venues, and their  
28 ability/willingness to pay their own transport costs to attend HoS.  
29  
30  
31  
32  
33  
34  
35  
36  
37  
38  
39  
40  
41

## 42 **Analysis**

### 43 *Quantitative analysis*

44  
45 Quantitative analysis was carried out using IBM SPSS V23.0 and STATA V14. The person  
46 undertaking the analysis was blind to allocation and group assignment was coded using 0  
47 and 1. As this is a feasibility study, analyses are primarily descriptive and focus on baseline  
48 participant characteristics and the estimation of key feasibility parameters.<sup>69</sup> Estimates of  
49 recruitment, retention and questionnaire completion rates are presented with 95%  
50 confidence intervals (CIs). Intervention attendance rates are described.  
51  
52  
53  
54  
55  
56  
57  
58  
59  
60

1  
2  
3  
4  
5 Preliminary estimates of effect size with 95% CIs are presented for the three candidate  
6  
7 primary outcomes to inform the plausibility of the effect sizes used in future sample size  
8  
9 calculations. Participants were analysed in the group they were randomised to and we  
10  
11 attempted to collect outcome measure data from everyone randomised. Missing data were  
12  
13 assumed to be missing completely at random (MCAR) and no imputation methods were  
14  
15 used. Analysis of covariance was used to estimate effect size for each outcome variable at  
16  
17 follow-up, adjusting for centre and the respective baseline values. Although stroke severity  
18  
19 was a stratification variable in the randomisation we have not adjusted for it in the analysis  
20  
21 because of the very small number with a severe stroke. In the future trial we would also take  
22  
23 into account clustering effects resulting from the group-based nature of the HoS  
24  
25 intervention.<sup>70</sup> We have not taken into account clustering in the analysis presented here  
26  
27 because (a) this is a feasibility study where the aim is not to obtain precise estimates of  
28  
29 effect size and (b) there were just 56 participants (29 receiving the HoS intervention) and  
30  
31 only a small number of clusters (n = 4) making it difficult to adjust for clustering. A  
32  
33 consequence is that widths of the 95% confidence intervals are likely to be underestimated.  
34  
35 Standardised effect sizes (Cohen's *d*) were obtained by dividing effect sizes by pooled  
36  
37 baseline standard deviation.

#### 40 *Economic analysis*

41  
42 We report completion rates for the resource use categories. A preliminary estimate of the  
43  
44 cost of delivering the HoS intervention was derived using macro-level costings. We also  
45  
46 report artist facilitator time to deliver the intervention at the micro-level and patient travel  
47  
48 expenses to the sessions.

49  
50  
51  
52 We further report resource use units and costs per category per trial arm, for an indication of  
53  
54 cost drivers for the intervention for the health and social care perspective. We derived  
55  
56  
57  
58  
59  
60

1  
2  
3 capability index scores for the ICECAP-A<sup>71</sup> and applied UK preference-based tariffs to the  
4 SF-6D to derive quality-adjusted life-years.<sup>72</sup>  
5  
6  
7

### 8 *Qualitative analysis*

9  
10 The qualitative analysis consisted of two aspects i). a content analysis<sup>73</sup> of participants'  
11 views of the research processes which are presented in this paper and ii). a thematic  
12 analysis<sup>74</sup> about participants' expectations and experiences of the HeART of stroke group  
13 which will be reported in a future paper. The interviews were transcribed verbatim.  
14  
15  
16  
17  
18  
19

20 For the content analysis CEH read each transcript and for each transcript noted the  
21 response to the specific focused questions relating to the research processes such as  
22 recruitment, screening and the administration of outcome measures as well as the  
23 acceptability of the venue, the intervention, and potential willingness to pay for the  
24 intervention (latter three, intervention group only). These specific responses were then  
25 collated together across all participants by CEH and formed the findings presented below.  
26  
27  
28  
29  
30  
31  
32  
33  
34  
35

## 36 **RESULTS**

### 37 *Study procedures, recruitment and retention rates*

38  
39 Fifty-six people were randomised (88% of our original target of 64) (see Figure 3). Nearly  
40 two-thirds of the sample was male and the mean age of the sample was 70 (SD 12.1) years  
41 and mean time-since-stroke was 9 (SD 6.1) months. Approximately 80% of participants had  
42 had ischaemic strokes. Seventy percent of the sample was retired (see Table 1). One  
43 participant who had had their stroke outside the 2 year post-stroke inclusion time window (32  
44 months post-stroke) was erroneously recruited into the study. We included this participant's  
45 data in the analysis.  
46  
47  
48  
49  
50  
51  
52  
53  
54  
55

56 *INSERT TABLE 1 ABOUT HERE*  
57  
58  
59

1  
2  
3  
4  
5 Participants were enrolled into the study between August 2014 and April 2015 and the final  
6  
7 follow-up occurred in December 2015. The recruitment rate across both centres was 14%  
8  
9 [95% CI: 11% to 17%]. In Bournemouth, an acute hospital setting, the recruitment rate was  
10  
11 11% [95% CI: 8% to 14%] and in Cambridgeshire, a community setting, it was 28% [95% CI:  
12  
13 19% to 38%].  
14

15  
16  
17 In total, information about the study was given or sent to 396 people (313 in Bournemouth  
18  
19 and 83 in Cambridgeshire). Of these, 198 people declined participation, 112 did not return  
20  
21 the reply slip, four did not meet the inclusion criteria, 26 were excluded for 'other reasons'  
22  
23 (see Figure 3).  
24

25  
26  
27 Six participants (11%) withdrew from both the study and follow-up data collection and three  
28  
29 participants (5%) did not return the main outcome measures at follow-up. For two of the  
30  
31 three proposed potential primary outcomes (HADS and ICECAP-A), 47/56 (84% [95% CI  
32  
33 73% to 92%]) of randomised participants had complete baseline and follow-up data and  
34  
35 46/56 (82% [95% CI: 70% to 91%]) had complete baseline and follow-up data for the  
36  
37 WEMWBS.  
38

#### 39 40 41 *Reasons for non-participation*

42  
43 Of 198 people declining participation, 89 gave reasons, the most common ones related to  
44  
45 not being interested/feeling the intervention 'wasn't for them' (n=27) and health reasons  
46  
47 (n=14).  
48

#### 49 50 51 *Delivery, attendance rates and group size*

52  
53 Five participants allocated to the HoS arm declined the intervention post-randomisation (see  
54  
55 CONSORT diagram for reasons). Of the 29 participants randomised to HoS sessions 20  
56  
57 (69% [95% CI; 51% to 84%]) attended six or more of the 10 sessions.  
58

1  
2  
3  
4  
5 Two HoS groups were delivered in Bournemouth (iterations 1 & 2) and two in  
6  
7 Cambridgeshire (iterations 3 & 4). The timing of the HoS sessions deviated slightly from that  
8  
9 specified in the original protocol in three of the four iterations due to venue availability and  
10  
11 the timing of public holidays. The planned group size was 6-8 participants and this target  
12  
13 was mostly met in iterations 1-3 with 70% (21/30) of the delivered sessions including six or  
14  
15 more people. In iteration 4 due to time pressures (the grant coming to an end) only 11  
16  
17 people were randomised with six allocated to the intervention. There were two drop-outs out  
18  
19 before the group commenced and one person withdrew after the first session meaning that  
20  
21 90% of sessions included 3 people or fewer. A summary of attendance at the HoS groups  
22  
23 broken down by centre and session is presented in Web Supplement Table S1. Seventy-  
24  
25 two percent of participants randomised to the HoS arm attended the final session (session  
26  
27 10) of the HoS group intervention.

28  
29  
30 Self-reported ratings on the domains of the Doojse Scale (measuring 'sense of belonging')<sup>55</sup>  
31  
32 increased across sessions and remained high in the final session (see Table S2 in data  
33  
34 supplement).

#### 35 36 37 38 *Support requirements for HoS group members*

39  
40 At the Cambridgeshire centre one of the artist facilitators discussed a HoS group member's  
41  
42 cognitive needs with FG (clinical psychology). Subsequently, several adaptations were  
43  
44 identified and implemented such as providing a small sketchpad when needing to wait for  
45  
46 additional support and providing instructions one step at a time.

#### 47 48 49 50 *Suitability of the outcome measures and feasibility of the assessment strategy*

51  
52 The ACE-R was originally designed as a screening tool for dementia and provides a single  
53  
54 overall total score with higher scores indicating better cognitive functioning. It relies heavily  
55  
56 on language abilities meaning that people with aphasia can perform poorly on domains such  
57  
58

1  
2  
3 as memory because of language impairments.<sup>75</sup> It did not prove suitable for our sample, of  
4 whom nearly half (46%) had some degree of language difficulty. For this reason we have  
5 not presented the baseline descriptive data for the ACE-R as we do not feel they provide an  
6 accurate summary of the sample's cognitive abilities given that some of the domains rely on  
7 verbal fluency and expression.  
8  
9  
10  
11  
12

13  
14 Overall, participants found the self-reported outcome measures acceptable and were able to  
15 complete them, sometimes requiring support. However, several participants noted to the  
16 blinded assessors that they had found the HISDS-III difficult to complete (in terms of  
17 understanding the meaning of some of the bipolar adjective pairs and also in understanding  
18 the response format of the scale). These difficulties were reflected in some of the polarised  
19 response patterns obtained and corroborated by the blinded assessors' experiences. For  
20 these reasons we have not presented these data.  
21  
22  
23  
24  
25  
26  
27  
28  
29

30 Missing questionnaire data were followed-up via telephone by a research assistant  
31 (baseline) or blinded assessor (follow-up) at each centre. Levels of missing data were very  
32 low - overall, 99.8% of the questionnaire items comprising the candidate primary outcomes  
33 were completed (1809/1815 items at baseline and 1550/1551 items at follow-up) by those  
34 who provided outcomes (at baseline n= 55 and follow up n = 47).  
35  
36  
37  
38  
39  
40  
41

#### 42 *Support requirements to complete outcomes*

43  
44 At follow-up, the self-report questionnaire booklets were administered via post by default but  
45 face-to-face support was provided if required/requested. Fifty-eight percent of those with  
46 follow-up data (26/45, data for 2 cases missing) reported that they completed the  
47 questionnaire booklet with no support, 8 (18%) received support from the researcher in the  
48 home, 10 (22%) received support from family and friends and 1 (2%) received telephone  
49 support from the blinded assessor.  
50  
51  
52  
53  
54  
55  
56  
57  
58  
59  
60



1  
2  
3 *Possible primary outcomes*

4 In Table 2 we present descriptives for the possible primary outcomes (WEMWBS, HADS-A,  
5 HADS-D, ICECAP-A) and descriptives for all other outcomes gathered are presented in Web  
6 Supplement Table S3.  
7  
8  
9

10  
11  
12 *INSERT TABLE 2 ABOUT HERE*  
13  
14  
15

16 *Completion of resource use questionnaire*

17 The resource use questionnaire was completed by 50/56 of participants (89%); 25/29 of  
18 patients in the HoS arm and 25/27 of patients in the usual care arm. Of these 33 (66%) were  
19 administered over the telephone, 16 (32%) face-to-face at home and 1 (2%) via the post.  
20 Although not included in the original study protocol, in the Bournemouth centre duration data  
21 were logged with the 19 telephone interviews lasting 23 minutes (SD=10) on average and  
22 the 8 face-to-face administrations in the home an average of 38 minutes (SD=13).  
23  
24  
25  
26  
27  
28  
29

30  
31  
32 Completion rates of resource use categories were high and similar between the arms of the  
33 trial (Table 3). The least completed category was community based services such as primary  
34 care visits (see Table 3) with 90% complete data for this category (both trial arms  
35 combined). Seventy-nine percent complete data (out of the full sample) is available for an  
36 economic analysis from the health and social care perspective.  
37  
38  
39  
40  
41  
42  
43

44 *INSERT TABLE 3 ABOUT HERE*  
45  
46  
47

48 *Assessor allocation guesses*

49 At the Cambridgeshire centre, due to a delay in receiving approval for patient access for the  
50 blinded assessor, the unblinded research assistant administered outcomes to six  
51 participants. Overall 50/56 participants (Cambridgeshire = 23; Bournemouth = 27) completed  
52 questionnaire outcomes and/or telephone health use questionnaires at follow-up. In  
53  
54  
55  
56  
57  
58  
59  
60

1  
2  
3 Cambridgeshire, the blinded assessor correctly guessed allocation on 9/17 (53%) occasions  
4 (p = 1.00 using the exact binomial test to compare with expected percentage of 50%) (NB.  
5 the six outcome assessment occasions in Cambridgeshire that were not undertaken by a  
6 blinded assessor are excluded). In Bournemouth, the blinded assessor correctly guessed  
7 allocation on 24/27 (89%) occasions (p <.001). Thus overall the blinded assessors correctly  
8 guessed allocation on 33/44 (75% [95% CI 61% to 85%]) occasions, p = 0.001.  
9  
10  
11  
12  
13  
14  
15

#### 16 *Serious adverse events and adverse events*

17  
18 Five serious adverse events were reported during the study period. None was deemed  
19 related to the intervention. These included admissions to hospital for bunion removal, facial  
20 weakness and vomiting, atrial fibrillation, pneumonia, and a transient ischaemic attack.  
21  
22  
23  
24

25  
26 Five adverse events were noted. None was deemed related to the intervention. Four people  
27 attended the Emergency Department but were not admitted (water retention, fall at home,  
28 fall in the road, anxiety). One person sustained a minor injury to their arm at his/her home.  
29  
30  
31  
32

#### 33 *Cost of delivering the HoS intervention*

34  
35 The cost of delivering the HoS intervention was £1,960 in Bournemouth and £2,530 in  
36 Cambridgeshire, reflecting higher venue hire costs in Cambridgeshire (see Table 4). On  
37 average, six participants attended the two HoS iterations held in Bournemouth and four  
38 attended the two HoS iterations held in Cambridgeshire. The HoS intervention would cost  
39 the health care payer, on average, £327 per participant in Bournemouth and £657 in  
40 Cambridgeshire. The cost could be as low as £245 per participant at full capacity of 8  
41 people.  
42  
43  
44  
45  
46  
47  
48  
49  
50

51  
52 *INSERT TABLE 4 ABOUT HERE*  
53  
54  
55

#### 56 *Health-related quality of life gain, resource use and costs*

1  
2  
3 Table 5 reports the quality adjusted life year (QALY) gains from baseline and resource use  
4 and costs for the HoS and usual care arms. Potential cost drivers for the intervention are  
5 inpatient and outpatient appointments and contacts with a social worker.  
6  
7  
8  
9

10  
11 *INSERT TABLE 5 ABOUT HERE*

### 12 *Qualitative*

13  
14 All 12 people who were purposively sampled for interview (8 intervention, 4 usual care) were  
15 interviewed on two occasions (male = 7, female = 5; mean age = 70 years (range 51-83  
16 years); mean time-since-stroke = 7 months (range 4-12 months); mean interview duration 40  
17 mins (range 10-65 mins). Most had had a mild, and one a moderately disabling, stroke. Nine  
18 had an affected arm and five had speech difficulties. Participants were positive about the  
19 research processes and reported finding the screening and baseline measures easy to  
20 complete with the support provided ('not too bad, or 'no trouble, it was quite straightforward').  
21 One person commented negatively on the cognitive assessment as her husband who lived  
22 with dementia had had to complete it in the past. Participants found the outcome measures  
23 and resource use questionnaire acceptable ('it was all right, yeah'; 'no problems, no  
24 problems at all'). Some people valued receiving the resource use log to complete as they  
25 went along saying 'it was helpful to do it beforehand' or using the paper versions of  
26 questionnaires that were sent in advance to supplement telephone interviews saying it was  
27 not a problem due to 'the fact that I had it in front of me as well.' One person noted they  
28 would have liked more opportunities for open answers on the questionnaires so he/she could  
29 provide some explanations about his/her responses. All interviewees would have been  
30 happy to complete outcome measures at 4 and 12 months follow up, if asked.  
31  
32  
33  
34  
35  
36  
37  
38  
39  
40  
41  
42  
43  
44  
45  
46  
47  
48  
49

50 Timing of sessions (held in the morning) and session duration (2 hours) were acceptable.  
51 While the venues were found to be acceptable, a few people mentioned that they would  
52 have liked access to a café where they could meet following the HoS sessions. Participants  
53 in Bournemouth were willing to pay up to £10 per session for transport if required. As all but  
54  
55  
56  
57  
58  
59  
60

1  
2  
3 one interviewee in Cambridgeshire drove to sessions (it was a much more rural setting than  
4 Bournemouth) and were happy to do so, transport costs were not discussed during the  
5 interviews. The one interviewee who used transport in Cambridgeshire only attended one  
6 session due to health issues (unrelated to stroke). Findings related to expectations and  
7 experiences of taking part in the groups will be reported elsewhere.  
8  
9  
10  
11  
12  
13

## 14 **DISCUSSION**

### 15 **Main findings**

16  
17 This is the first study to formally test the feasibility of an Arts & Health intervention for people  
18 post-stroke in the community. While there are two other RCTs of Arts and Health  
19 interventions in stroke<sup>46-48</sup> both of these involved inpatients in a rehabilitation setting rather  
20 than people living in the community. One involved a creative art intervention that, unlike HoS  
21 was highly prescribed, making direct comparisons difficult.  
22  
23  
24  
25  
26  
27  
28  
29  
30

31 Attendance at the HoS intervention groups was high. The majority of people who took part  
32 in the HoS groups highly valued them, with many reporting increased confidence both within  
33 and outside the groups. The numbers who declined the intervention were similar to those  
34 reported in the Morris et al. study.<sup>47,48</sup> Study retention was good with follow-up data available  
35 for 84% of participants and data completion rates were high (> 80% for the candidate  
36 primary outcome measures).  
37  
38  
39  
40  
41  
42  
43  
44

45 The structured breaks between the HoS sessions were potentially instrumental in  
46 encouraging participants to continue art work outside the group. The links created with local  
47 arts and health practitioners led to some participants continuing more independent creative  
48 practice after the research ended. Important practical considerations include ensuring that  
49 venues are on public or community transport routes, have free and disabled car parking  
50  
51  
52  
53  
54  
55  
56  
57  
58  
59  
60

1  
2  
3 facilities, heating/air conditioning and drink-making facilities. In the full multi-centre trial, to  
4 maximise recruitment and be as inclusive as possible, transport will be provided, if required.  
5  
6

7  
8  
9 The included outcome measures were mostly acceptable (but see limitations section) with  
10 some participants requiring support to complete them. The possible primary outcome  
11 measures for the future trial (WEMWBS, HADS-D, HADS-A, ICECAP-O) all demonstrated  
12 change in the direction of benefit for the HoS arm. In Morris et al.'s randomised controlled  
13 feasibility study of a visual arts participation intervention for stroke inpatients, a quality of life  
14 scale was initially suggested as the likely primary outcome for a future trial.  
15 However, their findings suggested that a measure of emotional wellbeing (the Positive and  
16 Negative Affect Scale) would be a more relevant primary outcome measure. Similarly, in the  
17 current study a measure of emotional wellbeing (HADS-D) is being considered as the  
18 primary outcome for a subsequent definitive trial and, with medium standardised effect sizes,  
19 it is likely that such a trial would be feasibly sized.  
20  
21  
22  
23  
24  
25  
26  
27  
28  
29  
30

31  
32 We have used novel dissemination methods such as making a short film involving people  
33 who had attended the HoS groups in Bournemouth, holding an art exhibition in both  
34 Bournemouth and Cambridgeshire to showcase the creations of the HoS group members.  
35  
36  
37  
38  
39

#### 40 *Limitations; Implications for a future trial*

41  
42 We did not quite reach our original recruitment target and the overall recruitment rate was  
43 low (though not unlike that reported in another community-based study<sup>76</sup>). In the current  
44 study the recruitment rate in the community setting (28%) was higher than that via hospitals  
45 (11%). This might be because in Cambridgeshire recruitment was undertaken by clinicians  
46 working in the community who often had a long-standing relationship with their clients. In  
47 contrast, at Bournemouth and Christchurch hospitals, while some potential participants were  
48 known and approached directly by the research nurses, others were identified from clinical  
49 databases and sent study information in the post.  
50  
51  
52  
53  
54  
55  
56  
57  
58  
59  
60

1  
2  
3  
4  
5 The most common reason for people declining participation in the current study was  
6 because they felt the intervention 'wasn't for them'. Similarly Morris et al., (2017)<sup>48</sup> also  
7 reported that the majority of people declined participation in their feasibility study of a visual  
8 arts participation programme because they were ambivalent about art participation.  
9  
10 Modifying the description of the HoS intervention, such as referring to it as 'an opportunity to  
11 reconnect with and gain confidence in everyday life', rather than calling it an arts intervention  
12 could be one way to enhance recruitment. Morris et al. (2017) suggested that provision of  
13 taster sessions may be another means of improving study enrolment<sup>48</sup> though we note a risk  
14 of jeopardising equipoise or increasing the likelihood of resentful demoralisation.  
15  
16 Additionally, we could extend the eligibility criteria by providing additional support so that  
17 people who require support with toileting needs could attend, though this would have cost  
18 implications. Finally, we could also expand the recruitment strategy to include primary care.  
19  
20 We will continue to consult with service users and stakeholders to seek their advice on ways  
21 of increasing recruitment rates and how best to convey the essence of the intervention to  
22 people.  
23  
24  
25  
26  
27  
28  
29  
30  
31  
32  
33  
34  
35

36 The resource use data obtained in this feasibility study provide insights into the main  
37 potential cost drivers for the intervention meaning that we can refine and shorten the  
38 resource use questionnaire for the definitive trial. While administering the resource use  
39 questionnaire by telephone resulted in high levels of data completeness, maintaining  
40 assessor blinding at follow-up proved challenging, particularly in the Bournemouth centre. To  
41 try to increase the success of assessor blinding, we will add instructions on the printed  
42 versions of the outcome measures that emphasise the importance of not disclosing  
43 allocation group and will reword the question in the resource use questionnaire that asks  
44 about contacts with charities, social or activity groups. We will also seek patient and public  
45 involvement advice about how we can best convey the message not to disclose allocation at  
46  
47  
48  
49  
50  
51  
52  
53  
54  
55  
56  
57  
58  
59  
60

1  
2  
3 the start of the telephone resource use interview and, based on this, will create a standard  
4  
5 script. We will provide training for the blinded assessors.  
6  
7

8  
9 Some participants reported finding the HISDS-III difficult to complete. For these reasons we  
10  
11 would not include this outcome in a future trial. The ACE-R also proved problematic due to  
12  
13 its heavy reliance on language abilities. It will be important to identify a more appropriate  
14  
15 way to evaluate specific domains of cognitive functioning for the future trial. One possibility is  
16  
17 the recently developed Oxford Cognitive Screen<sup>75</sup> which has been designed specifically with  
18  
19 a stroke population in mind and is purportedly inclusive for individuals with aphasia and  
20  
21 neglect. While only short-term follow-up was included in this feasibility study, a future  
22  
23 definitive study would include longer term 12 month follow-up.  
24  
25

26  
27 The idea for the HoS intervention originated from a stroke survivor (and co-author) (RC) who  
28  
29 had identified a gap in service provision. Since then, Arts & Health approaches are  
30  
31 beginning to be recognised by policy makers as a useful way to support the health and  
32  
33 wellbeing of communities.<sup>39</sup> With NHS pressures and difficulties of accessing formal  
34  
35 services<sup>77</sup> our relatively low cost intervention (which could be as low as £245 per person if  
36  
37 delivered at full capacity) offers potential to form part of a comprehensive long term support  
38  
39 pathway to reduce depression following a stroke and increase community access and  
40  
41 participation. As we look ahead to a future definitive trial it will be important to draw upon  
42  
43 implementation science expertise and to consult with key stakeholders. This will help us to  
44  
45 ensure that the HoS intervention, if found to be effective and cost-effective, can be rolled out  
46  
47 within existing health service and social care structures and is designed in such a way so as  
48  
49 to facilitate its rapid adoption and implementation into practice.  
50  
51

## 52 **Acknowledgements**

53  
54 We would like to thank the Study Sponsor, the Royal Bournemouth and Christchurch  
55  
56 Hospitals (RBCH) NHS Foundation Trust. We would like to acknowledge the Stroke  
57  
58  
59

1  
2  
3 Research Network Rehabilitation Clinical Subgroup for supporting our initial  
4 development work and the Research Design Service (South West) for providing  
5 invaluable advice on study design, methodology, and grantsmanship. We would like  
6 to thank Elliot Carter from the Peninsula Clinical Trials Unit at Plymouth University for  
7 designing and implementing a bespoke web-based randomisation system. We would  
8 like to thank the patient and public involvement group and Dr Catherine Ford for providing  
9 key input into aspects of study design, outcome measures and study materials. We would  
10 also like to thank Dr Susan Hunter, Professor Fiona Jones and Catherine Ovington for  
11 agreeing to be members of the Study Steering group. We would like to thank the Stroke  
12 Research team at RBCH and the Community Neuro-rehabilitation teams in Cambridgeshire  
13 for their invaluable help with recruitment. We would like to thank all the participants who took  
14 part and for their contributions to dissemination activities including a video, press releases  
15 and interviews, art exhibitions held in each centre and a workshop at the UK National Stroke  
16 Forum and to FB and MDBD for the images of their work. Finally we would like to  
17 acknowledge and extend our thanks to the National Institute for Health Research who  
18 funded this study through the Research for Patient Benefit programme.  
19  
20  
21  
22  
23  
24  
25  
26  
27  
28  
29  
30  
31  
32  
33  
34  
35

### 36 **Contributors**

37  
38 CEH and ST are equal contributors and joint first authors. CEH (Chief Investigator), FG  
39 (Principal Investigator, Cambridge Centre), CLR and RC were involved in the conception of  
40 the study and CEH, ST and FG led the design. CEH with ST and FG led the writing of initial  
41 grant application and protocol. DJ and FG advised on clinical aspects related to the grant  
42 application, PT led the statistical component of the study, EM led the economic evaluation,  
43 supported by TP and KG and FR advised on the qualitative aspects. MG and SN refined  
44 aspects of the draft protocol. MG coordinated the study on a day-to-day basis. CT and AW  
45 organised and administered the blinded assessments. ST and CEH drafted the manuscript,  
46 FG, MG, PT and EM provided detailed feedback and all other authors critically reviewed and  
47 approved the final version.  
48  
49  
50  
51  
52  
53  
54  
55  
56  
57  
58  
59  
60



### Competing interests

None

### Funding

This paper presents independent research funded by the National Institute for Health Research (NIHR) under its Research for Patient Benefit (RfPB) Programme (Grant Reference Number PB-PG-0212-27054). The views expressed are those of the author(s) and not necessarily those of the NHS, the NIHR or the Department of Health. This study is included in the National Institute of Health Research Clinical Network (NIHR CRN) portfolio.

We were awarded funding from the National NIHR-SRN Rehabilitation Clinical Subgroup to bring the research team together and prepare the grant application.

FG was supported by NIHR Flexibility and Sustainability Funding via Cambridgeshire Primary Care Trust R&D Department.

### Ethics approval

Ethics approval was granted by the Exeter NRES Committee (REC Ref 13/SW/0136) on 30/07/13. Local Research and Development approval was granted by the Royal Bournemouth and Christchurch Hospital NHS Foundation Trust on 06/05/14. This Trust is the study sponsor. Local Research and Development approval was granted by Cambridgeshire Community Services NHS Trust on 29/05/14.

### Provenance and peer review

Not commissioned; peer reviewed for ethical and funding approval prior to submission.

**Data Sharing Statement:**

Requests for de-identified data should be directed to the corresponding author.

**Table 1: Baseline clinical and demographic descriptives for the sample**

| Descriptor                                                        | Usual Care (UC)<br>(n=27) | HeART of Stroke (HoS)<br>(n=29) | Entire cohort<br>(n=56) |
|-------------------------------------------------------------------|---------------------------|---------------------------------|-------------------------|
| <b>Sex [n (%)]</b>                                                |                           |                                 |                         |
| ▪ Female; Male                                                    | 7 (26%); 20 (74%)         | 17 (59%); 12 (41%)              | 24 (43%); 32 (57%)      |
| <b>Age (years) Mean (SD) range</b>                                | 67.4 (12.83) 39-88        | 72.0 (11.22) 27-87              | 69.8 (12.1) 27-88       |
| <b>Ethnicity</b>                                                  |                           |                                 |                         |
| ▪ White English                                                   | 25 (93%)                  | 23 (79%)                        | 48 (86%)                |
| ▪ White other British                                             | 1 (4%)                    | 5 (17%)                         | 6 (11%)                 |
| ▪ Mixed- white and Asian                                          | 1 (4%)                    | -                               | 1 (2%)                  |
| ▪ Black or Black British – African                                | -                         | 1 (3%)                          | 1 (2%)                  |
| <b>Time-since-stroke (months) Median (IQR) range*</b>             | 7 (5) 2-19                | 7 (7) 1-32                      | 7 (5) 1-32              |
| <b>Stroke type [n (%)]</b>                                        |                           |                                 |                         |
| ▪ Ischaemic/thrombotic                                            | 6 (22%)                   | 5 (17%)                         | 11 (20%)                |
| ▪ Ischaemic/embolic                                               | 1 (4%)                    | 1 (3%)                          | 2 (4%)                  |
| ▪ Haemorrhagic/Intracerebral                                      | 2 (7%)                    | 2 (7%)                          | 4 (7%)                  |
| ▪ Haemorrhagic subarachnoid                                       | -                         | 1 (3%)                          | 1 (2%)                  |
| ▪ Ischaemic/type unknown                                          | 13 (48%)                  | 16 (55%)                        | 29 (52%)                |
| ▪ Haemorrhagic/type unknown                                       | 4 (15%)                   | 3 (10%)                         | 7 (13%)                 |
| ▪ Type unknown                                                    | 1 (4%)                    | 1 (3%)                          | 2 (4%)                  |
| <b>Stroke severity (Rivermead Gross motor assessment) [n (%)]</b> |                           |                                 |                         |
| Total Score ≤ 6                                                   | 1 (4%)                    | 2 (7%)                          | 3 (5%)                  |
| Total Score ≥ 7                                                   | 26 (96%)                  | 27 (93%)                        | 53 (95%)                |
| <b>Stroke side [n (%)]</b>                                        |                           |                                 |                         |
| ▪ Left CVA                                                        | 11 (42%)                  | 15 (52%)                        | 26 (47%)                |
| ▪ Right CVA                                                       | 13 (50%)                  | 11 (38%)                        | 24 (44%)                |
| ▪ Both sides                                                      | 1 (4%)                    | 3 (10%)                         | 4 (7%)                  |
| ▪ Not applicable                                                  | 1 (4%)                    | -                               | 1 (2%)                  |
| ▪ System missing                                                  | 1                         | -                               | 1                       |
| <b>Centre [n (%)]</b>                                             |                           |                                 |                         |
| ▪ Bournemouth                                                     | 16 (59%)                  | 17 (59%)                        | 33 (59%)                |
| ▪ Cambridgeshire                                                  | 11 (41%)                  | 12 (41%)                        | 23 (41%)                |
| <b>Level of education [n (%)]</b>                                 |                           |                                 |                         |
| Highest qualification achieved:                                   |                           |                                 |                         |
| ▪ No qualifications                                               | 3 (12%)                   | 8 (30%)                         | 11 (20%)                |
| ▪ One or more GCSE                                                | 4 (16%)                   | 4 (15%)                         | 8 (14%)                 |
| ▪ One or more A level                                             | 5 (20%)                   | 1 (4%)                          | 6 (11%)                 |
| ▪ First degree or higher                                          | 1 (4%)                    | 5 (19%)                         | 6 (11%)                 |
| ▪ Other                                                           | 12 (48%)                  | 9 (33%)                         | 21 (38%)                |
| ▪ System missing                                                  | 2                         | 2                               | 4 (7%)                  |
| <b>Pre-stroke employment status</b>                               |                           |                                 |                         |
| ▪ Retired                                                         | 14 (52%)                  | 25 (86%)                        | 39 (70%)                |
| ▪ Full-time employment                                            | 3 (11%)                   | 1 (3%)                          | 4 (7%)                  |
| ▪ Part-time employment                                            | 3 (11%)                   | 1 (3%)                          | 4 (7%)                  |

| Descriptor                                                                                                                                | Usual Care (UC)<br>(n=27)                 | HeART of Stroke (HoS)<br>(n=29)            | Entire cohort<br>(n=56)                    |
|-------------------------------------------------------------------------------------------------------------------------------------------|-------------------------------------------|--------------------------------------------|--------------------------------------------|
| <ul style="list-style-type: none"> <li>▪ Self-employed</li> <li>▪ Other (unemployed; homemaker)</li> </ul>                                | 2 (7%)<br>5 (19%)                         | 1 (3%)<br>1 (3%)                           | 3 (5%)<br>6 (11%)                          |
| <b>Marital status [n (%)]</b>                                                                                                             |                                           |                                            |                                            |
| <ul style="list-style-type: none"> <li>▪ Single</li> <li>▪ Married/cohabiting</li> <li>▪ Separated/divorced</li> <li>▪ Widowed</li> </ul> | 4 (15%)<br>17 (63%)<br>3 (11%)<br>3 (11%) | 3 (10%)<br>13 (45%)<br>3 (10%)<br>10 (34%) | 7 (13%)<br>30 (54%)<br>6 (11%)<br>13 (23%) |
| <b>Household composition</b>                                                                                                              |                                           |                                            |                                            |
| <ul style="list-style-type: none"> <li>▪ Living alone</li> <li>▪ Living with others</li> <li>▪ Sheltered housing</li> </ul>               | 9 (33%)<br>18 (67%)<br>-                  | 13 (45%)<br>15 (52%)<br>1 (3%)             | 23 (41%)<br>32 (57%)<br>1 (2%)             |
| <b>Taking medication for mood</b>                                                                                                         |                                           |                                            |                                            |
| <ul style="list-style-type: none"> <li>▪ No</li> <li>▪ Yes</li> <li>▪ System missing</li> </ul>                                           | 21 (78%)<br>6 (22%)<br>-                  | 24 (86%)<br>4 (14%)<br>1                   | 10 (18%)<br>45 (82%)<br>1                  |
| <b>Communication difficulties†</b>                                                                                                        |                                           |                                            |                                            |
| <ul style="list-style-type: none"> <li>▪ No</li> <li>▪ Yes</li> </ul>                                                                     | 18 (67%)<br>9 (33%)                       | 12 (59%)<br>17 (41%)                       | 30 (54%)<br>26 (46%)                       |
| <b>Motricity Index Total Score*</b>                                                                                                       |                                           |                                            |                                            |
| Median (IQR) N                                                                                                                            | 86.3 (27) 12-100, 27                      | 81.0 (29) 1-100, 29                        | 83.6 (27) 56                               |

\*NB for one case one item was missing and was replaced by the mean

† Boston Severity Rating Scale

\*Although the inclusion criterion for the study was ≤ 24 months post stroke we erroneously recruited one participant at 32 months post stroke and this participant's data are included in the analysis.

**Table 2: Descriptives and preliminary estimates of effect size for potential primary outcomes**

| Outcome measure                                                                                                                                | Baseline<br>N=56 | Mean<br>difference<br>(95% CI) | Post<br>N=47    | Standardised<br>Effect Size<br>(Cohen's <i>d</i> ) |
|------------------------------------------------------------------------------------------------------------------------------------------------|------------------|--------------------------------|-----------------|----------------------------------------------------|
| <b>Warwick and Edinburgh Mental Well Being Scale (WEMWBS)</b> (potential range 14-70, higher scores greater wellbeing)                         |                  |                                |                 |                                                    |
| UC mean (SD) N                                                                                                                                 | 48.8 (10.64) 26  |                                | 48.0 (8.40) 21  |                                                    |
| HoS mean (SD) N                                                                                                                                | 46.9 (8.94) 29   |                                | 48.4 (10.28) 25 |                                                    |
| Mean diff [95% CI] in change from baseline (unadjusted)                                                                                        |                  | 2.25 [-2.83, 7.32]             |                 | 0.23                                               |
| Mean diff [95% CI] in change from baseline (adjusted for centre & baseline score)                                                              |                  | 1.14 [-3.42, 5.70]             |                 | 0.12                                               |
| <b>Hospital Anxiety and Depression Scale (HADS) Anxiety subscale</b> (potential range 0-21 each subscale, higher scores greater anxiety)       |                  |                                |                 |                                                    |
| UC mean (SD) N                                                                                                                                 | 7.4 (3.72) 27    |                                | 7.0 (4.13) 22   |                                                    |
| HoS mean (SD) N                                                                                                                                | 7.2 (4.29) 29    |                                | 6.3 (3.74) 25   |                                                    |
| Mean diff [95% CI] in change from baseline (unadjusted)                                                                                        |                  | -0.47 [-2.48, 1.54]            |                 | -0.12                                              |
| Mean diff [95% CI] in change from baseline (adjusted for centre & baseline score)                                                              |                  | -0.55 [-2.39, 1.28]            |                 | -0.14                                              |
| <b>Hospital Anxiety and Depression Scale (HADS) Depression subscale</b> (potential range 0-21 each subscale, higher scores greater depression) |                  |                                |                 |                                                    |
| UC mean (SD) N                                                                                                                                 | 4.8 (2.68) 27    |                                | 6.1 (3.33) 22   |                                                    |
| HoS mean (SD) N                                                                                                                                | 6.6 (3.76) 29    |                                | 6.0 (4.18) 25   |                                                    |
| Mean diff [95% CI] in change from baseline (unadjusted)                                                                                        |                  | -1.82 [-3.42, -0.22]           |                 | -0.56                                              |

|    |                                                                                   |                     |                |
|----|-----------------------------------------------------------------------------------|---------------------|----------------|
| 1  |                                                                                   |                     |                |
| 2  |                                                                                   |                     |                |
| 3  |                                                                                   |                     |                |
| 4  |                                                                                   |                     |                |
| 5  | Mean diff [95% CI] in change from baseline (adjusted for centre & baseline score) | -1.46 [-3.12, 0.21] | -0.45          |
| 6  |                                                                                   |                     |                |
| 7  | <b>ICECAP-A tariff</b> (potential range 0-1, higher scores greater capability)    |                     |                |
| 8  |                                                                                   |                     |                |
| 9  | UC mean (SD) N                                                                    | 0.81 (0.14) 26      | 0.78 (0.15) 21 |
| 10 |                                                                                   |                     |                |
| 11 | HoS mean (SD) N                                                                   | 0.75 (0.16) 29      | 0.76 (0.22) 25 |
| 12 |                                                                                   |                     |                |
| 13 | Mean diff [95% CI] in change from baseline (unadjusted)                           | 0.05 [-0.03, 0.13]  | 0.33           |
| 14 |                                                                                   |                     |                |
| 15 | Mean diff [95% CI] in change from baseline (adjusted for centre & baseline score) | 0.04 [-0.05, 0.12]  | 0.26           |

16 Where high scores indicate better outcomes, positive effect sizes suggest benefit for the HoS arm.  
 17 Where low scores indicate better outcomes, negative effect sizes suggest benefit for the HoS arm.

1  
2  
3  
4  
5  
6  
7  
8  
9  
10  
11  
12  
13  
14  
15  
16  
17  
18  
19  
20  
21  
22  
23  
24  
25  
26  
27  
28  
29  
30  
31  
32  
33  
34  
35  
36  
37  
38  
39  
40  
41  
42  
43  
44  
45  
46  
47

**Table 3: Completeness of resource use data**

|                                       | <b>N<br/>complete<br/>data</b> | <b>% of<br/>questionnaires<br/>filled in<br/>(n=25)</b> | <b>% of<br/>sample<br/>(n=29)</b> | <b>N<br/>complete<br/>data</b> | <b>% of<br/>questionnaires<br/>filled in<br/>(n=25)</b> | <b>% of<br/>sample<br/>(n=27)</b> |
|---------------------------------------|--------------------------------|---------------------------------------------------------|-----------------------------------|--------------------------------|---------------------------------------------------------|-----------------------------------|
|                                       | <b>Intervention</b>            |                                                         |                                   | <b>Usual Care</b>              |                                                         |                                   |
| <b>Health and social care</b>         |                                |                                                         |                                   |                                |                                                         |                                   |
| Outpatient visits                     | 25                             | 100%                                                    | 86%                               | 25                             | 100%                                                    | 93%                               |
| Inpatient visits                      | 25                             | 100%                                                    | 86%                               | 25                             | 100%                                                    | 93%                               |
| Community based services              | 21                             | 84%                                                     | 72%                               | 24                             | 96%                                                     | 89%                               |
| Personal social services              | 25                             | 100%                                                    | 86%                               | 24                             | 96%                                                     | 89%                               |
| Total health and social care          | 21                             | 84%                                                     | 72%                               | 23                             | 92%                                                     | 85%                               |
| <b>Further resource use collected</b> |                                |                                                         |                                   |                                |                                                         |                                   |
| Time off work                         | 25                             | 100%                                                    | 86%                               | 23                             | 92%                                                     | 85%                               |
| Time off normal activities            | 25                             | 100%                                                    | 86%                               | 25                             | 100%                                                    | 93%                               |
| Hours of help per week                | 21                             | 84%                                                     | 72%                               | 24                             | 96%                                                     | 89%                               |
| Private therapies used                | 25                             | 100%                                                    | 86%                               | 25                             | 100%                                                    | 93%                               |

|                                |    |      |     |    |      |     |
|--------------------------------|----|------|-----|----|------|-----|
| Charity/support group contacts | 25 | 100% | 86% | 25 | 100% | 93% |
|--------------------------------|----|------|-----|----|------|-----|

**Table 4: HoS delivery costs**

| <b>Cost of delivering HoS</b>                            | <b>Bournemouth</b> | <b>Cambridgeshire</b> |
|----------------------------------------------------------|--------------------|-----------------------|
| <i>Costs for 10 sessions</i>                             |                    |                       |
| Artist fee                                               | £1,200             | £1,200                |
| Venue cost                                               | £430               | £1,000                |
| Materials cost                                           | £330               | £330                  |
| <b>Total</b>                                             | <b>£1,960</b>      | <b>£2,530</b>         |
| Mean no. of participants per session                     | 6.0                | 3.85                  |
| Cost of HoS per participant (based on mean attendance)   | £327               | £657                  |
| Cost of HoS per participant at capacity (8 attendees)    | £245               | £316                  |
| <b>Reporting micro-level resource use to deliver HoS</b> |                    |                       |
| <i>Artist time (in mean hours):</i>                      |                    |                       |
| Session duration                                         | 20.0               | 20.5                  |
| Preparation time                                         | 20.0               | 10.6                  |
| Travel time                                              | 15.0               | 15.6                  |
| <b>Total intervention time</b>                           | <b>55.0</b>        | <b>46.7</b>           |

Participant travel costs £1,021 £658

**Table 5: Outcomes resource use and cost of delivering care in both arms**

|                                | HoS Intervention |         |          |      |           |      | Usual care |         |          |      |           |      |
|--------------------------------|------------------|---------|----------|------|-----------|------|------------|---------|----------|------|-----------|------|
|                                | N                | N users | Mean use | SD   | Mean cost | SD   | N          | N users | Mean use | SD   | Mean cost | SD   |
| <b>Outcomes</b>                |                  |         |          |      |           |      |            |         |          |      |           |      |
| QALYs gained (SF6D)            | 22               | -       | 0.18     | 0.03 | -         | -    | 21         | -       | 0.17     | 0.02 | -         | -    |
| <b>Inpatient and A &amp; E</b> |                  |         |          |      |           |      |            |         |          |      |           |      |
| Inpatient admissions           | 25               | 3       | 0.9      | 3.0  | £49       | £136 | 25         | 3       | 0.7      | 2.8  | £96       | £308 |
| A & E or hospital admissions   | 25               | 4       | 0.2      | 0.4  | £22       | £53  | 25         | 6       | 0.2      | 0.4  | £34       | £61  |
| <b>Outpatient appointments</b> |                  |         |          |      |           |      |            |         |          |      |           |      |
| Stroke rehabilitation          | 25               | 1       | 0.0      | 0.2  | £10       | £50  | 25         | 2       | 0.1      | 0.3  | £20       | £69  |
| Physiotherapy                  | 25               | 3       | 0.3      | 1.2  | £6        | £23  | 25         | 4       | 1.0      | 2.9  | £20       | £56  |
| Occupational therapy           | 25               | 1       | 0.0      | 0.2  | £1        | £4   | 25         | 3       | 0.2      | 0.5  | £3        | £9   |
| Speech and language therapy    | 25               | 2       | 0.2      | 0.8  | £4        | £16  | 25         | 2       | 0.4      | 1.6  | £7        | £30  |
| Psychologist                   | 25               | 0       | 0.0      | 0.0  | £0        | £0   | 25         | 0       | 0.0      | 0.0  | £0        | £0   |



|                                    |    |    |     |     |      |      |    |    |     |     |      |      |
|------------------------------------|----|----|-----|-----|------|------|----|----|-----|-----|------|------|
| Dietician                          | 25 | 0  | 0.0 | 0.0 | £0   | £0   | 25 | 0  | 0.0 | 0.0 | £0   | £0   |
| Other outpatient appointments      | 25 | 14 | 1.2 | 1.5 | £140 | £210 | 25 | 13 | 2.0 | 3.2 | £196 | £393 |
| <b>Community-based services</b>    |    |    |     |     |      |      |    |    |     |     |      |      |
| GP contacts                        | 24 | 17 | 1.9 | 1.5 | £92  | £79  | 25 | 18 | 1.6 | 2.0 | £72  | £83  |
| GP nurse contacts                  | 25 | 11 | 1.6 | 3.0 | £22  | £44  | 25 | 16 | 2.0 | 3.1 | £26  | £40  |
| Physiotherapy contacts             | 25 | 3  | 0.3 | 1.2 | £6   | £23  | 25 | 2  | 0.9 | 3.7 | £19  | £78  |
| SALT contacts                      | 24 | 3  | 0.4 | 1.3 | £25  | £82  | 25 | 3  | 1.1 | 3.5 | £94  | £308 |
| Occupational therapy at home       | 25 | 1  | 0.2 | 0.8 | £5   | £25  | 25 | 2  | 0.2 | 0.9 | £7   | £27  |
| Repeat prescriptions from GP       | 23 | 16 | 4.0 | 5.6 | £5   | £7   | 24 | 18 | 4.0 | 4.3 | £5   | £5   |
| Other community-based appointments | 21 | 2  | 0.4 | 1.4 | £25  | £77  | 24 | 1  | 0.3 | 1.6 | £28  | £143 |
| <b>Personal social services</b>    |    |    |     |     |      |      |    |    |     |     |      |      |
| Home care worker contacts          | 25 | 0  | 0.0 | 0.0 | £0   | £0   | 24 | 2  | 0.9 | 3.4 | £11  | £41  |
| Social worker contacts (hours)     | 25 | 2  | 0.4 | 1.6 | £28  | £127 | 25 | 3  | 0.3 | 0.9 | £24  | £72  |
| Food at home services (meals)      | 25 | 0  | 0.0 | 0.0 | £0   | £0   | 25 | 1  | 0.6 | 3.2 | £4   | £21  |

## References

1. Townsend N, Wickramasinghe K, Bhatnagar P, et al. Coronary heart disease statistics. A compendium of health statistics. 2012 Edn. London: British Heart Foundation, 2012.
2. Department of Health. National stroke strategy. London: Department of Health, 2007.
3. Salter K, Hellings C, Foley N, et al. The experience of living with stroke: a qualitative meta-synthesis. *J Rehabil Med* 2008;40:595–602.
4. Hole E, Stubbs B, Roskell C, Soundy A. The patient's experience of the psychosocial process that influences identity following stroke rehabilitation: a metaethnography. *Sci World J* 2014;2014:349151
5. Pollock A, St George B, Fenton M, Firkins L. Top ten research priorities relating to life after stroke. *Lancet Neurol* 2012;11:209. doi: 10.1016/S1474-4422(12)70029-7.
6. Ayerbe L, Salma A, Wolfe CD, Rudd AD. Natural history, predictors and outcomes of depression after stroke: Systematic review and meta-analysis. *The Br J Psychiatry* 2013; 202:14-21.
7. Hackett ML, Pickles K. Part I: frequency of depression after stroke: an updated systematic review and meta-analysis of observational studies. *Int J Stroke* 2014 Dec;9(8):1017-25. doi: 10.1111/ijss.12357. Epub 2014 Aug 12.
8. Cant R. Rehabilitation following a stroke: a participant perspective. *Disabil Rehabil* 1997;19:297–304.

- 1  
2  
3 9. Gracey F, Palmer S, Rous B, et al. "Feeling part of things": personal construction of self  
4 after brain injury. *Neuropsychol Rehabil* 2008;18:627–50.  
5  
6  
7
- 8  
9 10. Ellis-Hill C, Horn S. Change in identity and self-concept: a new theoretical approach to  
10 recovery following a stroke. *Clinical Rehabil* 2000;14:299-307.  
11  
12  
13
- 14 11. Haslam C, Holme A, Haslam SA, et al. Maintaining group memberships: social identity  
15 continuity predicts well-being after stroke. *Neuropsychol Rehabil* 2008;18:671–91.  
16  
17  
18
- 19 12. Bulley C, Shiels J, Wilkie K, et al. Carer experiences of life after stroke—a qualitative  
20 analysis. *Disabil Rehabil* 2010;32:1406–13.  
21  
22  
23
- 24 13. Rigby H, Gubitz G, Eskes G, et al. Caring for stroke survivors: baseline and 1-year  
25 determinants of caregiver burden. *Int J Stroke* 2009;4:152–8.  
26  
27  
28
- 29 14. Saka O, MCGuire A, Wolfe C. Cost of stroke in the United Kingdom. *Age Ageing*  
30 2009;38:27–32.  
31  
32  
33
- 34 15. Gainotti, G, Antonucci G, Marra C, Paolucci S. Relation between depression after stroke,  
35 antidepressant therapy, and functional recovery. *J Neurol Neurosurg Psychiatry* 2001; 71:  
36 258-261.  
37  
38  
39
- 40 16. Pohjasvaara T, Vataja R, Leppavuori A, Kaste M. Depression is an  
41 independent predictor of poor long-term functional outcome poststroke. *Eur J Neurol*  
42 2001;8:315–9  
43  
44  
45
- 46 17. Bartoli F, Lillia N, Lax A, et al. Depression after stroke and risk of mortality: a systematic  
47 review and meta-analysis. *Stroke Res Treat* 2013; doi:10.1155/2013/862978.  
48  
49  
50  
51  
52  
53

- 1  
2  
3  
4  
5 18. Hackett ML, Anderson CS, House A, Halteh C. Interventions for preventing depression  
6 after stroke. Cochrane Database of Systematic Reviews 2008, Issue 3. Art. No.: CD003689.  
7  
8 DOI: 10.1002/14651858.CD003689.pub3.  
9  
10  
11  
12 19. Salter KL, Foley NC, Zhu L, Jutai JW, Teasell RW. Prevention of poststroke depression:  
13 does prophylactic pharmacotherapy work? J Stroke Cerebrovasc Dis. 2013 Nov;22(8):1243-  
14  
15 51. doi: 10.1016/j.jstrokecerebrovasdis.2012.03.013. Epub 2012 May 2.  
16  
17  
18  
19  
20 20. Hackett ML, Anderson CS, House A, Xia J. Interventions for treating depression after  
21 stroke. Cochrane Database of Systematic Reviews 2008, Issue 4. Art. No.: CD003437. DOI:  
22  
23 10.1002/14651858.CD003437.pub3.  
24  
25  
26  
27  
28 21. Robinson RG, Jorge RE. Post-Stroke Depression: A Review. Am J Psychiatry 2016;173:  
29  
30 221–231. <http://doi.org/10.1176/appi.ajp.2015.15030363>  
31  
32  
33  
34 22. Villa RF, Ferrari F, Moretti A. Post-stroke depression: Mechanisms and pharmacological  
35 treatment Pharmacol Ther. 2017 Nov 9. pii: S0163-7258(17)30289-9. doi:  
36  
37 10.1016/j.pharmthera.2017.11.005. [Epub ahead of print]  
38  
39  
40  
41  
42 23. Deng L, Sun X, Qiu S, et al. Interventions for management of post-stroke depression: A  
43 Bayesian network meta-analysis of 23 randomized controlled trials. Sci Rep  
44  
45 2017;28;7:16466. doi: 10.1038/s41598-017-16663-0.  
46  
47  
48  
49  
50 24. Watkins CL, Auton MF, Deans CF, et al. Motivational interviewing early after stroke. A  
51 randomized controlled trial. Stroke 2007;38:1004-9.  
52  
53  
54  
55  
56  
57  
58  
59  
60

- 1  
2  
3 25. Watkins CL, Wathan JV, Leathley MJ, et al. The 12-month effects of early motivational  
4 interviewing after acute stroke: a randomized controlled trial. *Stroke* 2011;45:1956–61.  
5  
6  
7  
8  
9 26. Mitchell PH, Veith RC, Becker KJ, et al. Brief psychosocial-behavioral intervention with  
10 antidepressant reduces poststroke depression significantly more than usual care with  
11 antidepressant. *Stroke* 2009;40:3073–8.  
12  
13  
14  
15  
16 27. Thomas SA, Walker MF, Macniven JA, Haworth H, Lincoln NB. Communication  
17 and Low Mood (CALM): a randomized controlled trial of behavioural therapy  
18 for stroke patients with aphasia. *Clin Rehabil* 2013;27:398–408.  
19  
20  
21  
22  
23  
24 28. Thomas SA, Coates E, Das Nair R, et al. Behavioural Activation Therapy for Depression  
25 after Stroke (BEADS): A study protocol for a feasibility randomised controlled pilot trial of a  
26 psychological intervention for post-stroke depression. *Pilot Feasibility Stud* 2016; 2: 45.  
27  
28  
29  
30  
31  
32 29. Lincoln NB, Flannaghan T. Cognitive behavioural psychotherapy for depression following  
33 stroke. *Stroke* 2003;43:111–5.  
34  
35  
36  
37  
38 30. Knapp P, Campbell Burton CA, Holmes J, et al. Interventions for treating anxiety after  
39 stroke. *Cochrane Database of Systematic Reviews* 2017, Issue 5. Art. No.: CD008860. DOI:  
40 10.1002/14651858.CD008860.pub3.  
41  
42  
43  
44  
45  
46 31. Kneebone I. Stepped psychological care after stroke. *Disabil Rehabil* 2016; 38:1836-  
47 1843.  
48  
49  
50  
51  
52 32. Harrison MA, Ryan A, Gardiner C, et al. Psychological and emotional needs,  
53 assessment and support post-stroke: a multi-perspective qualitative study. *Top Stroke*  
54 *Rehabil* 2017; 24:119-125.  
55  
56  
57  
58  
59  
60

- 1  
2  
3  
4  
5 33. Ellis-Hill C, Payne S, Ward C. Using stroke to explore the life thread model: an  
6  
7 alternative approach to rehabilitation. *Disabil Rehabil* 2008;30:150–9.  
8  
9  
10  
11 34. Gracey F, Evans JJ, Malley D. Capturing process and outcome in complex rehabilitation  
12  
13 interventions: a 'Y-shaped' model. *Neuropsychol Rehabil* 2009; 19: 867-890.  
14  
15  
16  
17 35. Wilson BA, Gracey F, Evans JJ, et al. *Neuropsychological rehabilitation. Theory, models,*  
18  
19 *therapy and outcome.* Cambridge: Cambridge University Press, 2009.  
20  
21  
22  
23 36. Todres L. Being with that: the relevance of embodied understanding for practice. *Qual*  
24  
25 *Health Res* 2008;18:1566–73.  
26  
27  
28  
29 37. Eilertsen G, Kirkevold M, Bjork IT. Recovering from a stroke:a longitudinal, qualitative  
30  
31 study of older Norwegian women. *J Clin Nurs* 2010;19:2004–13.  
32  
33  
34  
35 38. Stickley T, Parr H, Atkinson S, et al. Arts, health & wellbeing: reflections on a national  
36  
37 seminar series and building a UK research network *Arts & Health* 2017, 9:1, 14-25, DOI:  
38  
39 10.1080/17533015.2016.1166142.  
40  
41  
42  
43 39. All-Party Parliamentary Group on Arts, Health and Wellbeing. (2017). *Creative Health:*  
44  
45 *The Arts for Health and Wellbeing.* Available at:  
46  
47 <http://www.artshealthandwellbeing.org.uk/appg-inquiry>  
48  
49  
50  
51 40. Murray M, Gray R. Health psychology and the arts: a conversation. *J Health Psychol*  
52  
53 2008;13:147–53.  
54  
55  
56  
57  
58  
59  
60

- 1  
2  
3 41. Roe B. Arts for health initiatives: an emerging international agenda and evidence base  
4 for older populations. *J Adv Nurs* 2014;70: 1–3. doi:10.1111/jan.12216.  
5  
6  
7  
8  
9 42. Crone DM, Sumner RC, James DVB. ‘Artlift’ arts-on-referral intervention in UK primary  
10 care: updated findings from an ongoing observational study *Eur J Public Health* 2018 Feb 16.  
11 doi: 10.1093/eurpub/cky021.  
12  
13  
14  
15  
16 43. Boyce M, Bungay H, Munn-Giddings C, Wilson C. The impact of the arts in healthcare on  
17 patients and service users: A critical review. *Health Soc Care Community* 2017;1–16. doi:  
18 10.1111/hsc.12502.  
19  
20  
21  
22  
23  
24 44. Baumann M, Peck S, Collins C, Eades G. The meaning and value of taking part in a  
25 person-centred arts programme to hospital-based stroke patients: findings from a qualitative  
26 study, *Disabil Rehabil* 2013; 35:3, 244–256, DOI:10.3109/09638288.2012.694574  
27  
28  
29  
30  
31  
32 45. Ali K, Gammidge T, Waller D. Fight like a ferret: a novel approach of using art therapy to  
33 reduce anxiety in stroke patients undergoing hospital rehabilitation. *Med Humanit*  
34 2014;40:56-60.  
35  
36  
37  
38  
39  
40 46. Kongkasauwan R, Voraakhom K, Pisolayabutra P, et al. Creative art therapy to enhance  
41 rehabilitation for stroke patients: a randomized controlled trial. *Clin Rehabil* 2016; 30:1016-  
42 1023. Epub 2015 Sep 22.  
43  
44  
45  
46  
47  
48 47. Morris J, Kelly C, Toma M, et al. Feasibility study of the effects of art as a creative  
49 engagement intervention during stroke rehabilitation on improvement of psychosocial  
50 outcomes: study protocol for a single blind randomized controlled trial: the ACES study.  
51 *Trials* 2014.15:380 DOI: 10.1186/1745-6215-15-380.  
52  
53  
54  
55  
56  
57  
58  
59  
60

1  
2  
3 48. Morris JH, Kelly C, Joice S, et al. Art participation for psychosocial wellbeing during  
4 stroke rehabilitation: a feasibility randomised controlled trial. *Disabil Rehabil* 2017 Aug 30:1-  
5 10. doi: 10.1080/09638288.2017.1370499.  
6  
7

8  
9  
10 49. White J, Magin P, Attia J. et al. Predictors of health-related quality of life in community-  
11 dwelling stroke survivors: a cohort study. *Fam Pract* 2016 33:382-7. doi:  
12 10.1093/fampra/cmw011. Epub 2016 Mar 15.  
13  
14  
15

16  
17  
18 50. Ellis-Hill C, Gracey F, Thomas S, et al. HeART of Stroke (HoS)', a community-based Arts  
19 for Health group intervention to support self-confidence and psychological well-being  
20 following a stroke: protocol for a randomised controlled feasibility study. *BMJ Open* 2015;5:8  
21 e008888 doi:10.1136/bmjopen-2015-008888.  
22  
23  
24  
25

26  
27  
28 51. Eldridge, SM, Chan CL, Campbell MJ, et al. on behalf of the PAFS consensus group.  
29 CONSORT 2010 statement: extension to randomised pilot and feasibility trials. *BMJ*  
30 2016;355:i5239 [http:// dx.doi.org/10.1136/bmj. i5239](http://dx.doi.org/10.1136/bmj.i5239).  
31  
32  
33  
34

35  
36 52. Robinson R, Bolduc P, Price T. Two-year longitudinal study of poststroke mood  
37 disorders: diagnosis and outcome at one and two years. *Stroke* 1987;18:837-  
38 843. doi:10.1080/17533015.2016.1166142.  
39  
40  
41  
42

43  
44 53. Babkair LA. Risk Factors for Poststroke Depression: An Integrative Review. *J Neurosci*  
45 *Nurs.* 2017;49:73-84. doi: 10.1097/JNN.0000000000000271.  
46  
47  
48

49  
50 54. Lincoln N, Leadbitter D. Assessment of motor function in stroke patients. *Physiotherapy*  
51 1979;65:48-51.  
52  
53  
54  
55  
56  
57  
58  
59  
60



- 1  
2  
3 55. Doosje B, Ellemers N, Spears R. Perceived intragroup variability as a function of group  
4 status and identification. *J Exp Soc Psychol* 1995;31:410–36.  
5  
6  
7  
8  
9 56. Demeurisse G, Demol O, Robaye E. Motor evaluation in vascular hemiplegia. *Eur Neurol*  
10 1980;19:382–9.  
11  
12  
13  
14 57. Goodglass H, Kaplan E, Barresi B. The Boston Diagnostic Aphasia Examination (BDAE).  
15 3rd Edn. Baltimore: Lippincott Williams & Wilkins, 2001.  
16  
17  
18  
19  
20 58. Mioshi E, Dawson K, Mitchell J, et al. The Addenbrooke's Cognitive Examination  
21 Revised: a brief cognitive test battery for dementia screening. *Int J Geriatr Psychiatry*  
22 2006;21:1078–85.  
23  
24  
25  
26  
27  
28 59. Tennant R, Hiller L, Fishwick R, et al. The Warwick-Edinburgh Mental Well-being Scale  
29 (WEMWBS): development and UK validation. *Health Qual Life Out* 2007;16:606–13.  
30  
31  
32  
33  
34 60. Zigmond AS, Snaith RP. The Hospital Anxiety and Depression Scale. *Acta Psychiat*  
35 *Scand* 1983;67:361–70.  
36  
37  
38  
39  
40 61. Al-Janabi H, Flynn TN, Coast J. Development of a self-report measure of capability  
41 wellbeing for adults: the ICECAP-A. *Qual Life Res* 2012;21:167–76.  
42  
43  
44  
45  
46 62. Rosenberg M. *Society and the adolescent self-image*. Princeton, NJ: Princeton  
47 University Press, 1965.  
48  
49  
50  
51  
52 63. Ware JE, Sherbourne CD. The MOS 36-item Short-Form health survey (SF-36): I.  
53 Conceptual framework and item selection. *Med Care* 1992;30:473–83.  
54  
55  
56  
57  
58  
59  
60

- 1  
2  
3 64. Tyerman A, Humphrey M. Changes in self-concept following severe head injury. *Int J*  
4 *Rehabil Res* 1984;7:11–23.  
5  
6  
7  
8  
9 65. Marques, EMR, Johnson EC, Gooberman-Hill R, Blom AW & Noble SM. Resource Use  
10 Logs to Reduce the Amount of Missing Data in Economic Evaluations Alongside Trials.  
11 *Value Health* 2013;16:195-201.  
12  
13  
14  
15  
16 66. Curtis L, Burns A. Unit Costs of Health and Social Care 2015, Personal Social Services  
17 Research Unit, University of Kent, Canterbury. 2015.  
18  
19  
20  
21  
22 67. Department of Health. NHS Reference Costs 2014–2015. National Schedule of  
23 Reference Costs. London: Department of Health; 2015.  
24  
25  
26  
27  
28 68. Office for National statistics. Average weekly earnings dataset. 2015.  
29  
30  
31  
32 69. Lancaster GA, Dodd S, Williamson PR. Design and analysis of pilot studies:  
33 recommendations for good practice. *J Eval Clin Pract* 2004;10:307–12.  
34  
35  
36  
37  
38 70. Lee KI, Thompson SG. The use of random effects models to allow for clustering in  
39 individually randomized trials. *Clin Trials* 2005; 2: 163-173.  
40  
41  
42  
43  
44 71. Flynn TN, Huynh E, Peters TJ, Al-Janabi H, Moody A, Clemens S, Coast J. Scoring the  
45 ICECAP-A capability instrument. Estimation of a UK general population tariff. *Health Econ*  
46 2015;24:258-69. doi: 10.1002/hec.3014. Epub 2013 Nov 20.  
47  
48  
49  
50  
51  
52 72. Brazier J, Roberts J, Deverill M. The estimation of a preference-based measure of  
53 health from the SF-36. *J Health Econ* 2002; 21: 271-292.  
54  
55  
56  
57  
58  
59  
60

1  
2  
3 73. Hsieh H-F, Shannon SE. Three Approaches to Qualitative Content Analysis. Qual Health  
4 Res 2005;15:1277-1288.  
5

6  
7  
8 74. Braun V, Clarke V. Using thematic analysis in psychology. Qual Res Psychol 2006; 3:77-  
9 101.  
10  
11

12  
13  
14 75. Demeyere N, Riddoch MJ, Slavkova ED, Bickerton WL, Humphreys GW. The Oxford  
15 Cognitive Screen (OCS): validation of a stroke-specific short cognitive screening tool.  
16 Psychol Assess. 2015;27:883-94. doi: 10.1037/pas0000082. Epub 2015 Mar 2.  
17  
18  
19

20  
21  
22 76. McKenna S, Jones F, Glenfield P, et al. Bridges self-management programme for people  
23 with stroke in the community: a feasibility randomised controlled trial. Int J Stroke  
24 2015;10:697-704.  
25  
26  
27

28  
29  
30 77. Stroke Association New Era for Stroke report. Available: [https://www.stroke.org.uk/take-](https://www.stroke.org.uk/take-action/our-campaigns/new-era-stroke)  
31 [action/our-campaigns/new-era-stroke](https://www.stroke.org.uk/take-action/our-campaigns/new-era-stroke) 2016 Last accessed 9 March 2018.  
32  
33  
34

35  
36  
37 **Figure Legends:**

38  
39 Figure 1: Consolidated Standards of Reporting Trials (CONSORT) diagram

40  
41 Figure 2: Painting by MDBD

42  
43 Figure 3: Drawing by FB  
44  
45  
46  
47  
48  
49  
50  
51  
52  
53  
54  
55  
56  
57  
58  
59  
60



Figure 1: Consolidated Standards of Reporting Trials (CONSORT) diagram

209x297mm (300 x 300 DPI)

1  
2  
3  
4  
5  
6  
7  
8  
9  
10  
11  
12  
13  
14  
15  
16  
17  
18  
19  
20  
21  
22  
23  
24  
25  
26  
27  
28  
29  
30  
31  
32  
33  
34  
35  
36  
37  
38  
39  
40  
41  
42  
43  
44  
45  
46  
47  
48  
49  
50  
51  
52  
53  
54  
55  
56  
57  
58  
59  
60



Drawing by FB

169x127mm (300 x 300 DPI)

For peer review only

1  
2  
3  
4  
5  
6  
7  
8  
9  
10  
11  
12  
13  
14  
15  
16  
17  
18  
19  
20  
21  
22  
23  
24  
25  
26  
27  
28  
29  
30  
31  
32  
33  
34  
35  
36  
37  
38  
39  
40  
41  
42  
43  
44  
45  
46  
47  
48  
49  
50  
51  
52  
53  
54  
55  
56  
57  
58  
59  
60



Painting by MDBD

84x84mm (300 x 300 DPI)



## Supplementary Web tables

Table S1: Attendance at HoS by centre and session

|                                    | Bournemouth |             | Cambridge   |             | Total |
|------------------------------------|-------------|-------------|-------------|-------------|-------|
|                                    | Iteration 1 | Iteration 2 | Iteration 3 | Iteration 4 |       |
| <b>No. randomised to HoS group</b> | 8           | 9           | 6           | 6           | 29    |
| <b>HoS session</b>                 |             |             |             |             |       |
| 1                                  | 6           | 7           | 5           | 4           | 23    |
| 2                                  | 6           | 7           | 5           | 1           | 19    |
| 3                                  | 6           | 6           | 6           | 2           | 20    |
| 4                                  | 6           | 6           | 5           | 2           | 19    |
| 5                                  | 5           | 7           | 5           | 2           | 19    |
| 6                                  | 5           | 6           | 5           | 2           | 18    |
| 7                                  | 6           | 5           | 6           | 3           | 20    |
| 8                                  | 6           | 6           | 4           | 2           | 18    |
| 9                                  | 6           | 6           | 6           | 2           | 20    |
| 10                                 | 6           | 6           | 6           | 3           | 21    |

Table S2: Descriptives for Doojse's et al.'s social identification scale

| Sense of Belonging statement<br><i>(potential score range 1-7, higher scores indicate higher sense of belonging)</i> | Median (IQR) range  |                     |                      |
|----------------------------------------------------------------------------------------------------------------------|---------------------|---------------------|----------------------|
|                                                                                                                      | Session 1<br>(n=24) | Session 5<br>(n=20) | Session 10<br>(n=21) |
| 1. I see myself as a member of the HoS group                                                                         | 6 (2) 1-7           | 7 (1) 4-7           | 7 (0) 6-7            |
| 2. I am pleased to be a member of the HoS group                                                                      | 7 (2) 1-7           | 7 (1) 4-7           | 7 (0) 4-7            |
| 3. I feel strong ties with members of the HoS group                                                                  | 4 (5) 1-7           | 5 (3) 4-7           | 6 (2) 3-7            |
| 4. I identify with other members of the HoS group                                                                    | 5 (3) 1-7           | 6 (2) 4-7           | 7 (1) 4-7            |

**Table S3: Descriptives for potential secondary outcomes**

| Outcome measure                                                                     | Baseline<br>N=56 | Post<br>N=47     |
|-------------------------------------------------------------------------------------|------------------|------------------|
| <b>Rosenberg Self-Esteem Scale (RSES)</b>                                           |                  |                  |
| <i>(potential score range 0-30 , higher scores indicate higher self-esteem)</i>     |                  |                  |
| UC mean (SD) N                                                                      | 20.8 (6.23) 27   | 20.1 (5.21) 22   |
| HoS mean (SD) N                                                                     | 20.4 (5.81) 29   | 21.1 (5.67) 25   |
| <b>Medical Outcomes Short Form-36 (SF-36) - Physical functioning subscale</b>       |                  |                  |
| <i>(potential range 0-100, higher scores more favourable health)</i>                |                  |                  |
| UC mean (SD) N                                                                      | 43.4 (24.51) 27  | 42.7 (23.94) 22  |
| HoS mean (SD) N                                                                     | 48.3 (25.16) 27  | 55.3 (23.23) 23  |
| <b>SF-36 Role limitations - Physical subscale</b>                                   |                  |                  |
| <i>(potential range 0-100, higher scores more favourable health)</i>                |                  |                  |
| UC mean, SD (95% CI)                                                                | 23.9 (29.36) 27  | 17.0 (26.03) 22  |
| HoS mean (SD) N                                                                     | 35.0 (34.61) 28  | 27.0 (38.13) 25  |
| <b>SF-36 Role limitations - Emotional</b>                                           |                  |                  |
| <i>(potential range 0-100, higher scores more favourable health state)</i>          |                  |                  |
| UC mean (SD) N                                                                      | 42.4 (45.05) 27  | 50.0 (42.10) 22  |
| HoS mean (SD) N                                                                     | 45.3 (41.81) 28  | 49.3 (45.26) 25  |
| <b>SF-36 Energy/Fatigue subscale</b>                                                |                  |                  |
| <i>(potential range 0-100, higher scores more favourable health)</i>                |                  |                  |
| UC mean (SD) N                                                                      | 48.6 (18.01) 27  | 42.05 (20.45) 22 |
| HoS mean (SD) N                                                                     | 45.2 (25.5) 27   | 43.3 (25.40) 24  |
| <b>SF-36 Emotional wellbeing subscale</b>                                           |                  |                  |
| <i>(potential range 0-100, higher scores more favourable health)</i>                |                  |                  |
| UC mean SD (N)                                                                      | 68.91 (17.19) 27 | 69.81 (19.51) 22 |
| HoS mean SD (N)                                                                     | 67.33 (17.16) 27 | 68.83 (20.43) 24 |
| <b>SF-36 Social functioning subscale</b>                                            |                  |                  |
| <i>(potential range 0-100, higher scores more favourable health)</i>                |                  |                  |
| UC mean (SD) N                                                                      | 69.3 (26.65) 27  | 64.2 (29.70) 22  |
| HoS mean (SD) N                                                                     | 66.5 (26.45) 28  | 72.00 (28.25) 25 |
| <b>SF-36 Pain subscale</b>                                                          |                  |                  |
| <i>(potential range 0-100, higher scores more favourable health)</i>                |                  |                  |
| UC mean (SD) N                                                                      | 66.8 (24.45) 27  | 71.2 (28.32) 22  |
| HoS mean (SD) N                                                                     | 61.9 (24.97) 27  | 69.5 (27.63) 25  |
| <b>SF-36 General Health subscale</b>                                                |                  |                  |
| <i>(potential range 0-100, higher scores more favourable health)</i>                |                  |                  |
| UC mean SD N                                                                        | 55.2 (23.68) 27  | 55.5 (21.49) 22  |
| HoS mean (SD) N                                                                     | 51.4 (20.09) 27  | 57.3 (19.67) 24  |
| <b>SF-6D Derived health state value</b>                                             |                  |                  |
| <i>(potential range -0.296 to 1.00 with higher scores indicating better health)</i> |                  |                  |
| UC mean (SD) N                                                                      | 0.63 (0.09) 27   | 0.64 (0.08) 21   |
| HoS mean, SD N                                                                      | 0.64 (0.12) 26   | 0.68 (0.12) 24   |

UC = Usual Care

HoS = HeART of Stroke





## CONSORT 2010 checklist of information to include when reporting a pilot or feasibility trial\*

| Section/Topic                    | Item No | Checklist item                                                                                                                                                                              | Reported on page No |
|----------------------------------|---------|---------------------------------------------------------------------------------------------------------------------------------------------------------------------------------------------|---------------------|
| <b>Title and abstract</b>        |         |                                                                                                                                                                                             |                     |
|                                  | 1a      | Identification as a pilot or feasibility randomised trial in the title                                                                                                                      | 2                   |
|                                  | 1b      | Structured summary of pilot trial design, methods, results, and conclusions (for specific guidance see CONSORT abstract extension for pilot trials)                                         | 4-5                 |
| <b>Introduction</b>              |         |                                                                                                                                                                                             |                     |
| Background and objectives        | 2a      | Scientific background and explanation of rationale for future definitive trial, and reasons for randomised pilot trial                                                                      | 6-10                |
|                                  | 2b      | Specific objectives or research questions for pilot trial                                                                                                                                   | 13                  |
| <b>Methods</b>                   |         |                                                                                                                                                                                             |                     |
| Trial design                     | 3a      | Description of pilot trial design (such as parallel, factorial) including allocation ratio                                                                                                  | 13                  |
|                                  | 3b      | Important changes to methods after pilot trial commencement (such as eligibility criteria), with reasons                                                                                    | 16, 27              |
| Participants                     | 4a      | Eligibility criteria for participants                                                                                                                                                       | 15                  |
|                                  | 4b      | Settings and locations where the data were collected                                                                                                                                        | 16, 19-20           |
|                                  | 4c      | How participants were identified and consented                                                                                                                                              | 15-17               |
| Interventions                    | 5       | The interventions for each group with sufficient details to allow replication, including how and when they were actually administered                                                       | 17-20               |
| Outcomes                         | 6a      | Completely defined prespecified assessments or measurements to address each pilot trial objective specified in 2b, including how and when they were assessed                                | 20-23               |
|                                  | 6b      | Any changes to pilot trial assessments or measurements after the pilot trial commenced, with reasons                                                                                        | -                   |
|                                  | 6c      | If applicable, prespecified criteria used to judge whether, or how, to proceed with future definitive trial                                                                                 | -                   |
| Sample size                      | 7a      | Rationale for numbers in the pilot trial                                                                                                                                                    | 15                  |
|                                  | 7b      | When applicable, explanation of any interim analyses and stopping guidelines                                                                                                                | -                   |
| Randomisation:                   |         |                                                                                                                                                                                             |                     |
| Sequence generation              | 8a      | Method used to generate the random allocation sequence                                                                                                                                      | 17                  |
|                                  | 8b      | Type of randomisation(s); details of any restriction (such as blocking and block size)                                                                                                      | 17                  |
| Allocation concealment mechanism | 9       | Mechanism used to implement the random allocation sequence (such as sequentially numbered containers), describing any steps taken to conceal the sequence until interventions were assigned | 17                  |
| Implementation                   | 10      | Who generated the random allocation sequence, who enrolled participants, and who assigned participants to                                                                                   | 17                  |

|                                                      |     |                                                                                                                                                                                       |               |
|------------------------------------------------------|-----|---------------------------------------------------------------------------------------------------------------------------------------------------------------------------------------|---------------|
|                                                      |     | interventions                                                                                                                                                                         |               |
| Blinding                                             | 11a | If done, who was blinded after assignment to interventions (for example, participants, care providers, those assessing outcomes) and how                                              | 17,21,24      |
|                                                      | 11b | If relevant, description of the similarity of interventions                                                                                                                           | -             |
| Statistical methods                                  | 12  | Methods used to address each pilot trial objective whether qualitative or quantitative                                                                                                | 24-25         |
| <b>Results</b>                                       |     |                                                                                                                                                                                       |               |
| Participant flow (a diagram is strongly recommended) | 13a | For each group, the numbers of participants who were approached and/or assessed for eligibility, randomly assigned, received intended treatment, and were assessed for each objective | 25 + Figure 1 |
|                                                      | 13b | For each group, losses and exclusions after randomisation, together with reasons                                                                                                      | Figure 1      |
| Recruitment                                          | 14a | Dates defining the periods of recruitment and follow-up                                                                                                                               | 26            |
|                                                      | 14b | Why the pilot trial ended or was stopped                                                                                                                                              | -             |
| Baseline data                                        | 15  | A table showing baseline demographic and clinical characteristics for each group                                                                                                      | 39            |
| Numbers analysed                                     | 16  | For each objective, number of participants (denominator) included in each analysis. If relevant, these numbers should be by randomised group                                          | 41            |
| Outcomes and estimation                              | 17  | For each objective, results including expressions of uncertainty (such as 95% confidence interval) for any estimates. If relevant, these results should be by randomised group        | 41            |
| Ancillary analyses                                   | 18  | Results of any other analyses performed that could be used to inform the future definitive trial                                                                                      | 42-44;72-73   |
| Harms                                                | 19  | All important harms or unintended effects in each group (for specific guidance see CONSORT for harms)                                                                                 | 30            |
|                                                      | 19a | If relevant, other important unintended consequences                                                                                                                                  | -             |
| <b>Discussion</b>                                    |     |                                                                                                                                                                                       |               |
| Limitations                                          | 20  | Pilot trial limitations, addressing sources of potential bias and remaining uncertainty about feasibility                                                                             | 33-35         |
| Generalisability                                     | 21  | Generalisability (applicability) of pilot trial methods and findings to future definitive trial and other studies                                                                     | 33-35         |
| Interpretation                                       | 22  | Interpretation consistent with pilot trial objectives and findings, balancing potential benefits and harms, and considering other relevant evidence                                   | 32-36         |
|                                                      | 22a | Implications for progression from pilot to future definitive trial, including any proposed amendments                                                                                 | 34-35         |
| <b>Other information</b>                             |     |                                                                                                                                                                                       |               |
| Registration                                         | 23  | Registration number for pilot trial and name of trial registry                                                                                                                        | 5             |
| Protocol                                             | 24  | Where the pilot trial protocol can be accessed, if available                                                                                                                          | Referenced    |
| Funding                                              | 25  | Sources of funding and other support (such as supply of drugs), role of funders                                                                                                       | 37            |
|                                                      | 26  | Ethical approval or approval by research review committee, confirmed with reference number                                                                                            | 38            |

Citation: Eldridge SM, Chan CL, Campbell MJ, Bond CM, Hopewell S, Thabane L, et al. CONSORT 2010 statement: extension to randomised pilot and feasibility trials. *BMJ*. 2016;355.\*
