# Supplementary material for: HeART of Stroke: randomised controlled, parallel-arm, feasibility study of a community-based arts and health intervention plus usual care compared with usual care to increase psychological well-being in people following a stroke
Source: PubMed Central journal article supplement — BMJ Open. 2019 Mar 8;9(3):e021098. doi: 10.1136/bmjopen-2017-021098 (PMC6429750; doi:10.1136/bmjopen-2017-021098), 2019-03-08
Supplement: bmjopen-2017-021098supp001.pdf [file bmjopen-2017-021098supp001.pdf]

## Supplementary Web Tables

**Table S1: Attendance at HeART of Stroke (HoS) group by centre and session**

|                                    | Bournemouth |             | Cambridge   |             | Total |
|------------------------------------|-------------|-------------|-------------|-------------|-------|
|                                    | Iteration 1 | Iteration 2 | Iteration 3 | Iteration 4 |       |
| <b>No. randomised to HoS group</b> | 8           | 9           | 6           | 6           | 29    |
| <b>HoS session</b>                 |             |             |             |             |       |
| 1                                  | 6           | 7           | 5           | 4           | 22    |
| 2                                  | 6           | 7           | 5           | 1           | 19    |
| 3                                  | 6           | 6           | 6           | 2           | 20    |
| 4                                  | 6           | 6           | 6           | 2           | 20    |
| 5                                  | 5           | 7           | 5           | 2           | 19    |
| 6                                  | 5           | 6           | 5           | 2           | 18    |
| 7                                  | 6           | 5           | 6           | 3           | 20    |
| 8                                  | 6           | 6           | 4           | 2           | 18    |
| 9                                  | 6           | 6           | 6           | 2           | 20    |
| 10                                 | 6           | 6           | 6           | 3           | 21    |

**Table S2: Descriptives for Doojse's et al.'s Social Identification self-report scale**

| 'Sense of Belonging' statement                      | Median (IQR) range  |                     |                      |
|-----------------------------------------------------|---------------------|---------------------|----------------------|
|                                                     | Session 1<br>(n=24) | Session 5<br>(n=20) | Session 10<br>(n=21) |
| 1. I see myself as a member of the HoS group        | 7 (2) 1-7           | 7 (1) 4-7           | 7 (0) 6-7            |
| 2. I am pleased to be a member of the HoS group     | 7 (2) 1-7           | 7 (1) 4-7           | 7 (0) 4-7            |
| 3. I feel strong ties with members of the HoS group | 5 (3) 1-7           | 5 (3) 4-7           | 6 (2) 3-7            |
| 4. I identify with other members of the HoS group   | 6 (3) 1-7           | 6 (3) 4-7           | 7 (1) 4-7            |

*Please note - the total numbers of respondents for Sessions 1 and 5 differ slightly from the attendance data numbers reported in Table S1. This is because in 3 instances when participants were not present in the respective session they completed the Social Identification scale at the end of the subsequent week's session.*

**Table S3: Descriptives for potential secondary outcomes**

| <b>Outcome measure</b>                                                              | <b>Baseline<br/>n=56</b> | <b>Post<br/>n=47</b> |
|-------------------------------------------------------------------------------------|--------------------------|----------------------|
| <b>Rosenberg Self-Esteem Scale (RSES)</b>                                           |                          |                      |
| <i>(potential score range 0-30 , higher scores indicate higher self-esteem)</i>     |                          |                      |
| UC mean (SD) n                                                                      | 20.7 (5.82) 27           | 20.1 (5.21) 22       |
| HoS mean (SD) n                                                                     | 21.8 (4.98) 28           | 21.6 (5.18) 24       |
| <b>Medical Outcomes Short Form-36 (SF-36) - Physical functioning subscale</b>       |                          |                      |
| <i>(potential range 0-100, higher scores more favourable health)</i>                |                          |                      |
| UC mean (SD) n                                                                      | 44.1 (25.57) 27          | 42.7 (23.94) 22      |
| HoS mean (SD) n                                                                     | 50.4 (27.38) 27          | 53.8 (23.84) 24      |
| <b>SF-36 Role limitations - Physical subscale</b>                                   |                          |                      |
| <i>(potential range 0-100, higher scores more favourable health)</i>                |                          |                      |
| UC mean (SD) n                                                                      | 23.1 (29.36) 27          | 17.0 (26.03) 22      |
| HoS mean (SD) n                                                                     | 34.8 (36.22) 28          | 27.0 (38.13) 25      |
| <b>SF-36 Role limitations - Emotional subscale</b>                                  |                          |                      |
| <i>(potential range 0-100, higher scores more favourable health)</i>                |                          |                      |
| UC mean (SD) n                                                                      | 45.7 (44.48) 27          | 50.0 (42.10) 22      |
| HoS mean (SD) n                                                                     | 51.2 (43.02) 28          | 49.3 (45.26) 25      |
| <b>SF-36 Vitality subscale</b>                                                      |                          |                      |
| <i>(potential range 0-100, higher scores more favourable health)</i>                |                          |                      |
| UC mean (SD) n                                                                      | 46.3 (19.19) 27          | 42.0 (20.45) 22      |
| HoS mean (SD) n                                                                     | 46.9 (25.27) 27          | 44.6 (25.65) 25      |
| <b>SF-36 Emotional well-being subscale</b>                                          |                          |                      |
| <i>(potential range 0-100, higher scores more favourable health)</i>                |                          |                      |
| UC mean (SD) n                                                                      | 69.5 (17.86) 27          | 69.8 (19.51) 22      |
| HoS mean (SD) n                                                                     | 68.6 (16.78) 27          | 69.3 (20.12) 25      |
| <b>SF-36 Social functioning subscale</b>                                            |                          |                      |
| <i>(potential range 0-100, higher scores more favourable health)</i>                |                          |                      |
| UC mean (SD) n                                                                      | 65.7 (27.65) 27          | 64.2 (29.70) 22      |
| HoS mean (SD) n                                                                     | 65.6 (27.77) 28          | 72.0 (28.25) 25      |
| <b>SF-36 Pain subscale</b>                                                          |                          |                      |
| <i>(potential range 0-100, higher scores more favourable health)</i>                |                          |                      |
| UC mean (SD) n                                                                      | 67.1 (23.57) 27          | 71.2 (28.32) 22      |
| HoS mean (SD) n                                                                     | 62.6 (25.23) 28          | 69.5 (27.63) 25      |
| <b>SF-36 General Health subscale</b>                                                |                          |                      |
| <i>(potential range 0-100, higher scores more favourable health)</i>                |                          |                      |
| UC mean (SD) n                                                                      | 55.2 (21.82) 27          | 55.5 (21.49) 22      |
| HoS mean (SD) n                                                                     | 53.1 (20.22) 27          | 57.6 (19.32) 25      |
| <b>SF-6D Derived health state value</b>                                             |                          |                      |
| <i>(potential range -0.296 to 1.00 with higher scores indicating better health)</i> |                          |                      |
| UC mean (SD) n                                                                      | 0.63 (0.09) 27           | 0.64 (0.08) 21       |
| HoS mean (SD) n                                                                     | 0.64 (0.12) 26           | 0.68 (0.12) 24       |

UC = Usual Care

HoS = HeART of Stroke
